1  
2  
3  
4  
5  
6  
7  
8  
9  
10  
11  
12  
13  
14  
15  
16

**Hingepoints and neural folds reveal conserved  
features of primary neurulation in the zebrafish forebrain**

Jonathan M. Werner<sup>1\*</sup>, Maraki Y. Negesse<sup>1\*</sup>, Dominique L. Brooks<sup>1</sup>, Allyson R. Caldwell<sup>1</sup>,  
Jafira M. Johnson<sup>1</sup> and Rachel M. Brewster<sup>1</sup>

1. Department of Biological Sciences, University of Maryland Baltimore County,  
Baltimore, MD 21250

\* These authors contributed equally to the manuscript

17 **ABSTRACT**

18

19 Primary neurulation is the process by which the neural tube, the central nervous system  
20 precursor, is formed from the neural plate. Incomplete neural tube closure occurs frequently,  
21 yet underlying causes remain poorly understood. Developmental studies in amniotes and  
22 amphibians have identified hinge point and neural fold formation as key morphogenetic events  
23 and hallmarks of primary neurulation, the disruption of which causes neural tube defects. In  
24 contrast, the mode of neurulation in teleosts such as zebrafish has remained highly debated.  
25 Teleosts are thought to have evolved a unique pattern of neurulation, whereby the neural  
26 plate infolds in absence of hinge points and neural folds (NFs), at least in the hindbrain/trunk  
27 where it has been studied. We report here on zebrafish forebrain morphogenesis where we  
28 identify these morphological landmarks. Our findings reveal a deeper level of conservation of  
29 neurulation than previously recognized and establish the zebrafish as a model to understand  
30 human neural tube development.

31

32

33

34

35

36

## 37 INTRODUCTION

38 Primary neurulation is the process by which the neural tube, the precursor of the brain and  
39 spinal cord, is shaped from the neural plate. These morphogenetic events have mostly been  
40 studied in amniotes (mouse and chick) and amphibians (frogs), where conserved  
41 mechanisms were identified. Following neural induction, the neural plate (Supplemental  
42 Figure S1A) narrows and elongates by convergent extension movements<sup>1,2</sup>. The morphology  
43 of the neural plate is further changed in a biphasic manner<sup>3</sup>. The first morphological event is  
44 the formation of the medial hinge point (MHP), which bends the flat neural plate into a V  
45 shape, forming the neural groove (Supplemental Figure S1B). Neural Folds (NFs) at the  
46 edges of the neural plate subsequently elevate, a process that is further driven by head  
47 mesenchyme expansion<sup>4</sup>. In the second phase, the neural plate folds at paired dorso-lateral  
48 hinge points (DLHPs), bringing the NFs closer together (Supplemental Figure S1C). The NFs  
49 eventually meet and fuse at the midline, completing neural tube formation. The dorsal midline  
50 is subsequently remodeled to separate the inner neuroectoderm from the outer non-neural  
51 ectoderm fated to become the epidermis (Supplemental Figure S1D). In the cranial region of  
52 amniotes, neural tube closure is initiated at several sites and extends via a zippering process  
53 from these closure points to seal the neural tube. Incomplete cranial neural tube closure  
54 occurs frequently, resulting in anencephaly and exencephaly<sup>3</sup>.

55 Several cellular mechanisms have been identified that contribute to the bending of the  
56 neural plate, among which apical constriction is the most studied<sup>5-8</sup>. A meshwork of F-actin  
57 accumulates at the apical cortex of neuroectodermal cells and contracts, thereby reducing  
58 the cell apex (Supplemental Figure S1b1). The contraction is driven by myosin that co-  
59 localizes with F-actin at the apical pole. Disruption of F-actin using drug inhibitors or genetic

60 tools causes severe cranial neural tube defects<sup>5,9–14</sup>. Similarly, treatment with blebbistatin, an  
61 inhibitor of non-muscle myosin II activity, impairs apical constriction in the superficial layer of  
62 the *Xenopus* neural plate<sup>15</sup>.

63 In contrast to hinge point formation, the cell intrinsic mechanisms that shape NF cells  
64 are less understood. The NFs are bilaminar, consisting of a layer of neuroectoderm capped  
65 by a layer of non-neural ectoderm<sup>16</sup>, a topology that is acquired via epithelial ridging, kinking,  
66 delamination and apposition<sup>16,17</sup>. NF fusion involves the formation of cellular protrusions that  
67 span the midline gap and establish the first contact and attachment points with NF cells from  
68 the contralateral side<sup>18–20</sup> (Supplemental Figure S1c1). There is little consensus on the cell  
69 type (neuroectoderm or non-neural ectoderm) that generates the cellular protrusions as it  
70 varies depending on the species and the axial level. In the mouse forebrain, the initial contact  
71 is made by neuroectodermal cells<sup>18,21–24</sup>. Disruption of F-actin blocks the formation of  
72 protrusions and prevents NF fusion<sup>20</sup>, revealing the central role of these cellular processes.

73 While more anterior regions of the neural tube undergo primary neurulation as  
74 described above, most vertebrates also exhibit a distinct type of neural tube formation in  
75 more posterior regions, termed secondary neurulation. During this process, a mesenchymal  
76 cell population condenses into a solid neural rod that subsequently epithelializes and forms a  
77 central lumen<sup>25,26</sup>. In zebrafish, the neural tube in the hindbrain and trunk region initially forms  
78 a solid rod that later develops a lumen, a process seemingly analogous to secondary  
79 neurulation<sup>27</sup>. However, examination of the tissue architecture in zebrafish<sup>28–30</sup> and other  
80 teleosts<sup>31,32</sup> revealed that the neural rod is shaped by infolding of a neural plate (albeit  
81 incompletely epithelialized), which best fits the description of primary neurulation<sup>33</sup>. Despite  
82 this evidence, differences in tissue architecture, the multi-layered architecture of the neural



83 plate and the apparent lack of hinge points, neural groove and NFs are difficult to reconcile  
84 with a mode of primary neurulation and have contributed to the persistent view that neural  
85 tube formation in teleosts is different than in other vertebrates<sup>34-36</sup>.

86 We show here that, in contrast to the zebrafish hindbrain and trunk region, the process  
87 of neural tube formation in the forebrain exhibits many of the hallmarks of primary  
88 neurulation. We observe the presence of hinge points and NFs in the epithelialized anterior  
89 neural plate (ANP), demonstrate that formation of the MHP involves oscillatory apical  
90 contractions that progressively reduce the apical surface, and show that disruption of myosin  
91 function impairs apical constriction of these cells and NF convergence. We further show that  
92 neural tube closure is initiated at two separate sites in the forebrain and that fusion of the NFs  
93 is mediated by filopodial-like extensions of neuroectodermal cells that bridge the midline.  
94 These findings identify conserved mechanisms of primary neurulation that were previously  
95 overlooked in teleosts and support the suitability of zebrafish for understanding the etiology of  
96 human neural tube defects.

97 **RESULTS**

98 **Precocious epithelialization of the anterior neural plate is associated with bending**

99 The zebrafish ANP is quite distinct from the neural plate in more posterior regions, as it  
100 undergoes precocious epithelialization<sup>37</sup>. To assess whether epithelialization correlates with a  
101 change in the mode of neurulation, we examined the morphology of the neuroectoderm in  
102 optical cross sections at developmental stages ranging from 2 to 10 somites (som). We  
103 observed that at 2-5 som the ANP has a V shape marked by a medial neural groove (black  
104 arrowhead) flanked by the elevated lateral edges of the ANP (white arrowhead), which are  
105 reminiscent of NFs (Figure 1A-B). By 7 som the groove is no longer visible and the elevated  
106 edges of the ANP have fused medially (Figure 1C, white arrowhead) and form a dorsal bulge  
107 (Figure 1C-D, white arrowhead). These observations suggest that the ANP bends at the  
108 midline, which correlates with elevation of the lateral edges of the ANP.

109

110 **The anterior neural plate is multi-layered and gives rise to the eyes and forebrain**

111 The central part of the ANP is fated to become the eyes, while its lateral edges produce the  
112 dorsally-located telencephalon and the ventral-most ANP region gives rise to the  
113 hypothalamus/ventral diencephalon<sup>37,38</sup>. To gain a better understanding of the morphogenetic  
114 events that shape the ANP, we examined transverse views of transgenic Tg[*emx3:YFP*]  
115 embryos at developmental stages 2, 5, 7 and 10 som, in which telencephalon precursors are  
116 labeled<sup>39</sup>. We observed, as previously described<sup>37</sup>, that the ANP is a multi-layered tissue,  
117 with a mesenchymal superficial core and a marginal or deep layer. These layers will  
118 henceforth be referred to as the superficial and deep layers, respectively (s and d in Figure  
119 1E-F). The YFP-positive lateral edges of the ANP elevate, migrate over the eye field and fuse

120 medially at 7 som to form the telencephalon (Figure 1G-H). By 7 som the multilayered ANP  
121 resolves into a single-cell layered neuroectoderm (Figure 1G). While the morphological  
122 changes and cellular dynamics that form the eyes are quite well understood<sup>37,38</sup>, the  
123 accompanying events that shape the forebrain are for the most part unknown and the focus  
124 of the current study.

125

### 126 **Presence of hinge points and neural folds in the anterior neural plate**

127 To investigate whether the ANP bends and folds around hinge points to bring NFs in close  
128 apposition, we examined the cytoarchitecture of this tissue in embryos at stages 2-10 som,  
129 labeled with phalloidin (filamentous (F) actin), anti-Sox3 (neural cells) and anti-p63  
130 (epidermal cells, nuclear label) (Figure 1I-L).

131 We found that at 2 som, neural cells appear mesenchymal with no visible polarized  
132 enrichment of F-actin (Figure 1I), consistent with previous observations<sup>37</sup>. The epidermis at  
133 this stage is in a far lateral position (white arrowhead in Figure 1I).

134 Between 2 and 5 som, clusters of cells in the superficial and deep layers of the eye  
135 field have been reported to undergo early epithelialization<sup>37</sup>, which we confirm here with foci  
136 of F-actin enrichment in the medial/superficial region (M in Figure 1J, M) and in two dorso-  
137 lateral clusters in the deep marginal layer (DL in Figure 1J, M). The apical surfaces of the  
138 superficial cells appear to constrict and orient towards the midline, resulting in the formation  
139 of a medial neural groove (asterisk in Figure 1M). Similarly, the paired dorso-lateral clusters  
140 of cells in the deep layer are also apically constricted and the neuroectoderm folds sharply at  
141 this level (red arrows in Figure 1M). These data suggest that the medial and dorso-lateral  
142 cells enriched for apical F-actin may function as hinge points. Similarly to amphibians whose

143 neural plate is bilayered<sup>40</sup>, the putative medial hinge point in the zebrafish ANP forms in the  
144 superficial layer and is therefore more dorsally positioned than its chick and mouse  
145 counterpart. However, these cells eventually sink inwards, as revealed by fate mapping using  
146 photoconvertible membrane-targeted Kaede (mKaede) to label this cell population  
147 (Supplemental Movie 1). These findings are consistent with a previous study showing that  
148 superficial cells radially intercalate between deep marginal cells<sup>37</sup>, which contributes to the  
149 expansion of the optic vesicles (Figure 1G-H). Zebrafish dorso-lateral hinge points do not  
150 undergo these cellular rearrangements as they form in the deep layer.

151 The lateral edges of the ANP are bilaminar at 5 som, consisting of a layer of  
152 neuroectoderm cells capped by a layer of p63-positive non-neural ectoderm (and Sox3/p63-  
153 negative olfactory placodal cells bridging the two layers), indicative of a NF structure (Figure  
154 1J, M). The YFP-positive ANP cells in Tg[*emx3:YFP*] embryos correspond to the  
155 neuroectoderm component of the NF (Figure 1F), revealing that the tip of the NF gives rise to  
156 the telencephalon. At 4 som, the YFP-positive region of Tg[*emx3:YFP*] embryos extends the  
157 length of the forebrain (Figure 1O), delineating the anterior-posterior range of the NFs.

158 The NF and putative hinge points are transient as they are no longer observed in 7  
159 som embryos. By this stage, the tips of the NFs have converged medially and fused, forming  
160 the telencephalon (Figure 1K). These cells are enriched in apical F-actin at 10 som,  
161 suggesting that they epithelialize (Figure 1L). The non-neural ectoderm still occupies a lateral  
162 position at 7 som (Figure 1K, arrowheads), however by 10 som these cells migrate and fuse  
163 dorsally (single arrowhead in Figure 1L), indicating that, as observed in mice, the  
164 neuroectodermal component of the NFs meet first (Supplemental Figure S1)<sup>21,22</sup>.  
165 Measurements of the distance between the medial-most p63-positive domain and the dorsal

166 midline at stages 2-7 som indicate that the non-neural ectoderm portion of the NFs converges  
167 steadily towards the midline and may provide a lateral force that contributes to the  
168 displacement of NFs (Figure 1N).

169 These observations reveal that transient medial and dorso-lateral epithelialized cell  
170 clusters may be the functional equivalents of the MHP and paired DLHPs of amniotes (and  
171 will be referred to henceforth as such), as they form at the right time and place to contribute  
172 to the formation of the neural groove (MHP), bending of the neuroectoderm and medial  
173 convergence of the NFs.

174

### 175 **Cell shape changes underlying dorso-lateral hinge point and neural fold formation**

176 To capture the dynamics of NF formation and image cells at higher resolution, we mosaically  
177 expressed membrane-targeted GFP (mGFP) and imaged embryos at the 2-10 som stages in  
178 transverse sections (Figure 2). 3D reconstructions of some of these images were generated  
179 to visualize the spatial relation between labeled cells (Supplemental Movie 2, 3).

180 At 2 som, cells in the deep layer have a columnar shape with one end in contact with  
181 the basal lamina and a future apical surface oriented towards the midline (Figure 2A). These  
182 cells extend membrane protrusions into the superficial layer, which may promote radial  
183 intercalation (inset in Figure 2A).

184 At 5 som, cells in the dorso-lateral deep layer have undergone apical constriction and  
185 basal expansion, forming DLHPs (yellow dotted circles and double arrowheads in Figure  
186 2B,b1; Supplemental Movie 2). These cell shape changes may initiate the outpocketing of the  
187 optic vesicles (ov in Figure 2B,b1). The bilaminar organization of the NFs is clearly visible at  
188 this stage. Neuroectodermal cells within the NFs (arrows in Figure 2b1 and c1) are elongated

189 and their basal poles are constricted, giving them the appearance of fanning out from a focal  
190 point (red circles in Figure 2b1 and c1). Furthermore, their plasma membrane is ruffled,  
191 indicative of protrusive activity (Supplemental Movie 2).

192 By 7 som (Figure 2D, Supplemental Movie 3), neuroectodermal cells of the NFs have  
193 reached the dorsal midline. They maintain their organization with basal poles constricted and  
194 clustered at a focal point on the basement membrane (red circle in Figure 2d1). 3D  
195 reconstructions reveal that these cells are finger-shaped as they extend across the dorsal  
196 midline. DLHP cells maintain their apical constriction/basal expansion and further elongate,  
197 contributing to the expansion of the optic vesicles (dotted double arrowhead in Figure 2d1).

198 At 10 som (Figure 2E, e1) deep cells in the eye field and NFs have a columnar,  
199 epithelial organization. Consistent with previous findings, eye field cells shorten along their  
200 apico-basal axis by contracting their apical processes and coincidentally transition to a more  
201 dorso-ventral orientation<sup>37</sup> (dotted double arrow in Figure 2e1). Cuboidal non-neural  
202 ectoderm cells cover the dorsal surface of the newly formed telencephalon (arrowheads in  
203 Figure 2e1).

204 The dynamic cell shape changes in the deep layer of the neuroectoderm were  
205 quantified by measuring cell length and the apico:basal ratio of mGFP-labeled cells located at  
206 different positions along the medio-lateral axis of the ANP at 2, 5 and 7 som (Figure 3).  
207 These data reveal that the average length of DLHP cells increases while their apical:basal  
208 ratio decreases between 2 and 7 som, coincident with optic vesicle evagination. They also  
209 confirm that neuroectodermal cells of the NFs adopt the opposite configuration (reverse  
210 hinge-points), with basally constricted poles.

211 To capture the dynamics of NF formation, we performed transverse view time-lapse  
212 imaging of WT embryos expressing mKaede or Tg[*emx3:YFP*] transgenic embryos  
213 expressing membrane-targeted RFP (mRFP) (n=2 embryos, Figure 4; Supplemental Movies  
214 1 and 4. We observed that as the NFs elevate (blue dotted line in Figure 4A-C), NF cells  
215 basally constrict (red outline and arrow in Figure 4a1-c1). Interestingly, this cell behavior  
216 appears restricted to cells within the *emx3* expression domain (Figure 4D-f1).

217 These findings indicate that zebrafish DLHP cells adopt a wedge shape similar to their  
218 counterparts in amphibians and amniotes, which enables epithelial folding. They further  
219 identify basal constriction of NF cells as a cell shape change that contributes to NF formation.

220

### 221 **Medial hinge point cells constrict apically and elongate**

222 While mosaic expression of mGFP enabled high resolution imaging of DLHPs and NFs, it  
223 resulted in fewer cells labeled in the medial superficial layer, where the MHP forms.  
224 Phalloidin labeling was therefore used to image these cells in 2 and 5 som embryos.

225 At the 2 som stage, some medial/superficial cells immediately below the enveloping  
226 layer (EVL) are apically constricted, forming the MHP (Figure 5A-a2). By 5 som, MHP cells  
227 appear more densely packed, the majority of them are apically constricted and oriented  
228 towards the midline. Concomitant with these cell shape changes and the medial convergence  
229 of NFs, MHP cells shift to a more ventral position (Figure 5B-b2). A small opening, the neural  
230 groove, is observed immediately above the MHP at this stage (NG in Figure 5b1).

231 Measurements of the apico:basal surface ratio of MHP cells in 5 som embryos  
232 confirmed that they are wedge-shaped (Figure 5c1). Similar to amphibians<sup>41</sup>, apical  
233 constriction appears tightly coupled to cell elongation, as the length-to-width ratio (LWR) of

234 MHP cells increases significantly between 2 and 5 som (Figure 5c2). Thus, both apical  
235 constriction and cell elongation appear to shape the MHP and contribute to tissue-level  
236 morphogenesis.

237 Another contributing factor to hinge point formation in amniotes is the basal location of  
238 nuclei in both the medial and lateral hinge points<sup>42,43</sup>. However, in zebrafish embryos, the  
239 relative position of the nucleus in medial superficial cells at 2 and 5 som does not change  
240 significantly and is therefore unlikely to contribute to wedging of these cells.

241

### 242 **Oscillatory constrictions reduce the apical surface of medial hinge point cells**

243 To gain a better understanding of the dynamics of apical constriction and cell internalization,  
244 the ANP of embryos ubiquitously expressing mGFP was imaged from a dorsal view using  
245 time-lapse microscopy between 2 som to 4 som (n = 2 embryos, Figure 5D and Supplemental  
246 Movie 5). The focal plane was set immediately below the EVL, at the level of the MHP. These  
247 movies revealed clusters of medially-located cells that undergo progressive cell surface  
248 reduction (color-coded in Figure 5d1-d7), while the surface area of adjacent, more lateral  
249 cells remained unchanged for the duration of imaging (yellow asterisks in Figure 5d1-d6).  
250 EVL cells came into focus immediately posterior to the cells with reducing apices. Since the  
251 EVL is drawn inward as a result of its close contact with apically constricting MHP cells  
252 (Figure 5B-b2), we surmise that apical constriction proceeds in a posterior-to-anterior  
253 direction. In later movie frames, EVL cells are no longer observed within the field of view,  
254 coinciding with the proximity of the NFs to the midline (Supplemental Movie 5). This indicates  
255 that medial EVL cells eventually lose contact with the MHP and return to their original  
256 position, allowing the NFs to fuse at the dorsal midline (Figure 1J-K).



257 To further examine the dynamics of apical constriction, the surface area of superficial  
258 ANP cells was measured at shorter intervals. Midline cells presumed to be part of the MHP  
259 (20  $\mu\text{m}$  on either side of the midline, Figure 6A, E) or cells immediately adjacent to the MHP  
260 (greater than 20  $\mu\text{m}$  on either side of the midline, Figure 6B) were scored. This analysis  
261 revealed that individual cells in both populations undergo oscillatory constrictions. Between  
262 constrictions, the surface areas of cells re-expand with gradually decreasing amplitude  
263 (Figure 6A, E), which is most pronounced in MHP cells. The time of oscillation between two  
264 expanded states revealed no significant difference between both groups (Figure 6C, median  
265 oscillation time of 45 seconds). Likewise, there was no significant difference in the timing of  
266 individual constrictions. However, it appears that MHP cells spent less time expanding than  
267 MHP-adjacent cells (15 seconds median time for MHP vs 30 second for MHP-adjacent,  
268 Figure 6D).

269 Together these data indicate that MHP cells and their neighbors undergo progressive  
270 narrowing of their apical pole via oscillatory constrictions and that these cellular dynamics  
271 proceed in a posterior-to-anterior direction.

272

### 273 **Neural fold fusion is initiated at closure points and mediated by protrusive activity**

274 In mice, neurulation proceeds unevenly along the anterior-posterior axis with multiple closure  
275 initiation sites<sup>3</sup>, raising the question of whether NF fusion also occurs asynchronously in  
276 zebrafish. To address this, we performed time-lapse imaging of embryos mosaically  
277 expressing mGFP from a dorsal view around the time when opposing NFs approach the  
278 midline (n= 2 embryos, Figure 7A and Supplemental Movie 6). Neuroectodermal cells of the  
279 NF were identified based on their elongated shape and dorsal location.

280           These movies revealed that the NFs have an arc shape with the apex positioned  
281 anteriorly (red asterisks in Figure 7A), similar to the expression domain of the telencephalon  
282 marker *emx3* at the onset of NF convergence (inset in Figure 7A). NF fusion is initiated near  
283 the apex of the arch and proceeds in an anterior-to-posterior direction for a distance of  
284 approximately 35  $\mu\text{m}$  (red dotted line in Figure 7a3). At this level, defined as closure point  
285 one (C1 in Figure 7a3), NF fusion proceeds asynchronously as a second closure initiation  
286 site is formed more posteriorly (C2 in Figure 7A5). These closure points define an eye-  
287 shaped opening (white dotted oval in Figure 7a4, a5) and a zippering process begins at the  
288 anterior and posterior corners of this structure, progressing from both ends toward the middle  
289 (Figure 7a6,a7; Supplemental Movie 6).

290           The events that complete NF fusion in amniotes involve the extension of dynamic  
291 cellular projections towards the midline<sup>18–20</sup>. Likewise, we observed that zebrafish  
292 neuroectodermal cells extend filopodia to establish contact with cells from the contralateral  
293 side. Furthermore, the cell bodies appear to hyper-extend beyond the midline (Figure 7b3, b4  
294 and Supplemental Movie 7), suggesting that they interdigitate between cells of the opposing  
295 NF. These cellular extensions are eventually retracted, as the midline becomes well defined  
296 after epithelialization (Figure 1L).

297           The presence of closure points and the usage of filopodia to establish contact with NF  
298 cells across the midline reveal additional aspects of forebrain neurulation that are conserved  
299 in zebrafish.

300

301   **Temporal overlap in the timing of key cell shape changes in the anterior neural plate**

302 In amniotes, MHP formation precedes the shaping of paired DLHPs and initiates NF  
303 elevation. To reveal the relative timing of cell shape changes in zebrafish and their  
304 contributions to ANP morphogenesis, we plotted tissue dynamics using measurements from  
305 transverse time-lapse movies (n= 2 embryos, data shown for 1 embryo, Supplemental Movie  
306 1). We observed that changes in the neural groove angle (indirect measurement of MHP  
307 apical constriction), the optic vesicle angle (which reflects DLHP apical constriction) and the  
308 basal NF angle (a proxy for basal constriction) occur concurrently and temporally correlate  
309 with NF elevation and convergence (Figure 8). This analysis revealed that, in contrast to  
310 amniotes, key cell shape changes in the ANP do not occur in a clear chronological manner  
311 and that one or more of these events are likely to contribute to ANP morphogenesis.

312

### 313 **Molecular characteristics of medial and lateral hinge points**

314 Key features of cells that form hinge points include apico-basal polarization as well as an  
315 accumulation of an apical contractile machinery composed of actin filaments (F-actin) and  
316 non-muscle myosin II<sup>44</sup>. To test whether the MHP and DLHPs in the zebrafish forebrain have  
317 some or all of these characteristics, the localization of apical markers Pard3-GFP (transiently  
318 expressed following mRNA injection), ZO-1 (anti-ZO-1) and N-cadherin (anti-N-cad) was  
319 examined along with F-actin (phalloidin) and phospho-Myosin Light Chain II (anti-P-MLC) in 5  
320 som embryos (Figure 9).

321 Apical co-localization of F-actin with Pard3-GFP (Figure 9A-c2), ZO-1 (Figure 9D-f2),  
322 and N-cad (Figure 9G-i2) was confirmed in both the MHP and DLHPs at 5 som. Thus, while  
323 the establishment of apico-basal polarity is generally delayed in the zebrafish neural plate  
324 relative to amniotes, the cell clusters that undergo apical constriction in the ANP epithelialize

325 precociously. P-MLC accumulation at the apical pole is also apparent by the 5 som stage in  
326 MHP cells where it overlaps with F-actin (Figure 9J-I2). In contrast, P-MLC apical enrichment  
327 is not observed in the DLHPs (arrowhead in Figure 9K,I2). P-MLC does however accumulate  
328 in the cell cortex of all neuroectodermal cells where it overlaps with F-actin, in addition to the  
329 basal surface of EVL cells (arrow in Figure 9K, I1) and at the interface between the  
330 neuroectoderm and non-neural ectoderm (dotted line in Figure 9K-L).

331 These findings confirm that both the MHP and DLHP undergo early epithelialization  
332 and accumulate apical markers. However, the MHP and DLHPs are molecularly distinct  
333 structures given that the latter is not enriched for P-MLC.

334

### 335 **Myosin contractility is required for medial hingepoint formation and neural fold** 336 **convergence**

337 During neural tube closure, the actomyosin cytoskeleton is thought to be a driving force for  
338 apical constriction<sup>41</sup>. To address whether this molecular motor mediates apical constriction in  
339 zebrafish, non-muscle myosin II (NMII) was blocked using blebbistatin and a translation-  
340 blocking morpholino (MO) targeting NMIIb<sup>45</sup> and the effect was analyzed in 5 som embryos  
341 that were labeled to reveal the localization of F-actin (phalloidin) and P-MLC (anti-P-MLC).  
342 Both treatments resulted in the absence of a clearly defined MHP (Figure 10a1,a1' vs 10b1,  
343 b1', c1 and c1'). LWR scores for these cells were close to 1 (Figure 10D), indicative of cell  
344 rounding, which prevented measurement of their apical:basal surface ratio. In contrast, while  
345 the length of DLHPs in treated embryos was reduced (Figure 10D), these cells retained their  
346 wedge shape (Figure 10a2,a2' vs b2, b2', c2, c2), with apical:basal surface ratios of less than  
347 1 (Figure 10E). These observations are consistent with the lack of apical P-MLC enrichment

348 in DLHP cells and support a conserved function for actomyosin in driving apical constriction  
349 of MHP cells.

350 At a morphological level, disruption of the actomyosin network causes neural tube  
351 defects that trace back to impaired apical constriction and convergent extension in *Xenopus*  
352 embryos<sup>15</sup>. To test whether myosin is similarly required for forebrain neural tube closure in  
353 zebrafish, control (untreated and DMSO-treated) and blebbistatin-treated embryos were  
354 labeled at the 2, 5 and 7 som stage via *in situ* hybridization using the telencephalon marker  
355 *emx3* (Figure 10F) and the width of the posterior-most *emx3* domain was measured (Figure  
356 10G). In contrast to control embryos, NF convergence was impaired in blebbistatin-treated  
357 embryos, beginning at the 5 som stage. It is possible that earlier convergent extension  
358 defects in the ANP contribute to this phenotype. However, failure of MHP cells to undergo  
359 apical constriction is likely to be a contributing cause given that disruption of several other  
360 proteins implicated in this process, including Shroom3<sup>13</sup> and GEF-H1, a RhoA-specific GEF<sup>14</sup>  
361 results in severe neural tube closure defects.

362

## 363 **DISCUSSION**

364 We report here on mechanisms of forebrain morphogenesis in the zebrafish embryo and  
365 reveal that this region of the brain is formed by primary neurulation, involving the use of  
366 hinge points and NFs.

367 The zebrafish MHP and paired DLHPs form in the superficial and deep layers of the  
368 eye field, respectively. The timing of MHP and DLHP formation overlap in zebrafish, in  
369 contrast to the biphasic nature of these events in mouse<sup>3</sup>. The zebrafish MHP is cup-shaped  
370 and more transient than its mammalian counterpart since these cells eventually intercalate

371 between deep layer cells, contributing to the expansion of the eye vesicle<sup>37</sup>. Hinge points are  
372 restricted to the ANP in zebrafish, however they are also present in more posterior regions in  
373 amniotes. Despite this difference, individual cells in the medial zone of the hindbrain neural  
374 plate were recently shown to internalize via a myosin-dependent mechanism<sup>46</sup>. Such  
375 variation from the organized cell clusters forming hinge points in the zebrafish forebrain could  
376 be explained by precocious epithelialization of the ANP<sup>37</sup>. It thus appears that there is a  
377 transition from clustered internalization in the forebrain to individual cell internalization in the  
378 hindbrain region.

379 A key feature of hinge point cells is their reduced apical surface, which is in part due to  
380 actomyosin contractility<sup>13,41,47,48</sup>. Apical constriction is thought to function as a purse string to  
381 generate the force required to bring the NFs together during cranial neurulation<sup>49</sup>. We provide  
382 evidence that the zebrafish MHP also utilizes an actomyosin-based contractile system.  
383 Assembly of this actomyosin network occurs via oscillatory constrictions with gradually  
384 decreasing amplitude, akin to the ratchet model initially proposed in invertebrates<sup>50-52</sup> and  
385 later reported during neural tube closure in *Xenopus*<sup>53</sup>. We further show that disruption of  
386 myosin impairs NF convergence, possibly by contributing a “pulling force” on the NFs or by  
387 clearing the dorsal midline of eye field cells. These observations suggest that the actomyosin  
388 machinery is used across vertebrate to drive cranial neural tube closure and it will be  
389 interesting in the future to test whether upstream regulators of apical constriction such as  
390 Shroom3<sup>13</sup> are also conserved.

391 In contrast to the MHP, the paired DLHPs do not require myosin to apically constrict,  
392 suggesting that DLHP formation is regulated by a distinct mechanism. Consistent with this  
393 observation, cell packing at a dorso-ventral boundary in the mouse neural tube causes

394 buckling of the neuroectoderm at the DLHPs<sup>54</sup>. It is possible that such a mechanism also  
395 operates during zebrafish neurulation. Actomyosin may however generate cortical tension<sup>15</sup>,  
396 enabling both MHP and DLHP cells to maintain their elongated shape.

397       NFs in chick embryos form via epithelial ridging, kinking, delamination and  
398 apposition<sup>16</sup>, although the cellular basis of these morphogenetic events is not well  
399 understood. Elevation of the NFs in the mouse cranial neural plate is dependent on MHP  
400 constriction and expansion of the head mesenchyme<sup>55</sup>. NFs in the zebrafish are restricted to  
401 the ANP and head mesenchyme is unlikely to play a significant mechanical role in NF  
402 elevation, as the mesoderm layer underlying the ANP is thin. We instead identify basal  
403 constriction as a NF-intrinsic cell behavior that functions as a “reverse hinge point”. Basal  
404 constriction may contribute to the early stages of NF elevation or ridging/kinking (implicated in  
405 the acquisition of the bilaminar topology of the NFs). Based on scanning EM images of chick  
406 embryos, it appears that this cell behavior may also be conserved in amniotes<sup>16,17</sup>.

407       The final step of primary neurulation involves the convergence and fusion of the NFs  
408 at the dorsal midline. NF convergence in zebrafish is likely to be mediated by cell intrinsic  
409 forces, including MHP and DLHP formation, although it is difficult to parse out their relative  
410 contribution, in addition to extrinsic forces derived from the non-neural ectoderm<sup>17</sup>. NF fusion  
411 is initiated at closure points in mammals and birds<sup>56</sup>. We observe two closure points in the  
412 zebrafish forebrain that form an eye-shaped opening that narrows from the corners in a  
413 bidirectional manner. Fusion of the NFs is mediated by the formation of cell protrusions that  
414 span the midline and establish the first points of contact with NF cells from the contralateral  
415 side. Akin to mice<sup>21,22</sup>, the cells that initiate contact between apposing NFs in zebrafish derive  
416 from the neuroectodermal portion of the NFs. However, rather than establishing contact and

417 adhering via their lateral surfaces, the protrusive ends of zebrafish neuroectoderm cells  
418 appear to transiently interdigitate between their contralateral counterparts, forming a rod-like  
419 structure, the precursor of the telencephalon. These hyperextensions are later retracted as  
420 the telencephalon eventually epithelializes, forming a clearly defined midline. Once the  
421 neuroectoderm cells have met and fused, non-neural ectoderm cells complete their migration  
422 and fuse at the dorsal midline, forming a continuous epidermal layer.

423         In addition to the epidermis, frog and fish embryos are surrounded by an outer  
424 protective epithelial monolayer, called EVL in zebrafish. Given that the EVL is in direct  
425 contact with the NFs, it is possible that this epithelial layer contributes to forebrain  
426 morphogenesis by providing a stable substrate for NF convergence. Conversely, the EVL is  
427 transiently tugged inward as the MHP cells undergo apical constriction. It is therefore likely  
428 that the interactions between the neural ectoderm and the EVL are reciprocal.

429         Taken together, these findings reveal striking similarities and some unique features of  
430 forebrain neurulation in fish that have significant implications for our understanding of the  
431 evolution of neurulation and the relevance of zebrafish to understand human neural tube  
432 development.

433



434 **METHODS**

435 **Zebrafish strains/husbandry**

436 Studies were performed using wildtype (AB) strains or *Tg(emx3:YFP)<sup>b1200</sup>*<sup>39</sup> and embryos  
437 were raised at 28.5°C. All experiments were approved by the University of Maryland,  
438 Baltimore County's Institutional Animal Care and Use Committee (IACUC) and were  
439 performed according to national regulatory standards.

440

441 **Nucleic acid and morpholino injections**

442 Plasmids encoding membrane-targeted Green Fluorescent Protein (mGFP) (Richard  
443 Harland, University of California, Berkeley, CA, USA), membrane-targeted Red Fluorescent  
444 Protein (mRFP), membrane-targeted Kaede (mKaede) (a gift from Ajay Chitnis, National  
445 Institute of Health, Bethesda, MD) and *pard3:egfp<sup>57</sup>* were linearized with NotI and transcribed  
446 using the SP6 mMACHINE kit (Ambion, AM1340). For ubiquitous expression of  
447 *mGFP*, *mRFP*, *mkaede* or *par3d:eGFP*, 50 pg of RNA was injected into 1-cell stage embryos.  
448 For mosaic expression of mGFP, 50 pg of RNA was injected into 1 or 2 of the four central  
449 blastomeres at the 16-cell stage. These blastomeres have a high probability for neural fate<sup>58</sup>  
450 and are easy to identify for reproducible injections.

451 MOs were designed and synthesized by GeneTools (Philomath, Oregon, USA) and injected  
452 into 1-cell stage embryos. *mhy10*(Non-muscle Myosin IIB, EXON2-intron2) was delivered at  
453 3ng per injection.

454 *mhy10*: 5'-CTTCACAAATGTGGTCTTACCTTGA-3'<sup>45</sup>

455

456 Microinjections were performed using a PCI-100 microinjector (Harvard Apparatus, Holliston,  
457 MA, USA).

458

459 **Blebbistatin treatment**

460 90% epiboly embryos were manually dechorionated in an agarose-covered petri dish with E3  
461 medium. Once embryos reached the tailbud stage, they were placed into 50 $\mu$ M blebbistatin  
462 (B0560 Sigma-Aldrich) diluted with E3 and then incubated at 28.5°C. Stock solution of  
463 blebbistatin was prepared with DMSO as per manufacturer's instructions. Accordingly, a  
464 control group of embryos were treated with 1% DMSO diluted with E3 alongside every  
465 blebbistatin trial. Once the desired developmental stage was reached (2-, 5-, or 7-som),  
466 embryos were immediately fixed with 4% paraformaldehyde (PFA). As blebbistatin is light  
467 sensitive, embryos were kept in the dark as much as possible until fixation.

468

469 **Fixed tissue preparations and immunolabeling**

470 Embryos were fixed in 4% PFA for 16 hours at 4°C overnight. Immunolabeling was performed  
471 on whole mount embryos, which were then sectioned with a Vibratome (Vibratome 1500  
472 sectioning system), with the exception of N-cadherin, which was done on sections. Primary  
473 antibody incubation was performed for 24-48 hours at 4°C and secondary antibody incubation  
474 for 2.5 hours at room temperature.

475 Antibodies used: Rabbit anti-GFP at 1:1000 (Invitrogen, A11122), Rabbit anti-Sox3c at  
476 1:2000 (Gift from Michael Klymkowsky), Rabbit anti-P-myosin light chain at 1:50 (Cell  
477 Signaling Technology, #3671S), Mouse anti-p63 at 1:200 ( Santa Cruz BioTechnology, SC-  
478 8431 no longer in production), Rabbit anti-N-cadherin at 1:50 (Abcam, ab211116) and Mouse  
479 anti-ZO-1 antibody at 1:100 (Invitrogen, 33-9100). Alexa Fluorophore secondary antibodies  
480 were all used at a 1:1000 concentration: Goat anti-Rabbit -488, -568, -594 and Goat anti-  
481 Mouse -488, -594. Alexa Fluor 488-conjugated or 594-conjugated Phalloidin (Invitrogen,

482 A12379 and A12381 ) at 1:250 and DAPI (Invitrogen, D1306) were used according to  
483 manufacturer's instructions. Sections were mounted on glass slides using ProLong Diamond  
484 Antifade Mountant (Invitrogen, P36961). *Tg(emx3:YFP)<sup>b1200</sup>* embryos were immunolabeled  
485 with anti-GFP to amplify the signal. mGFP and *pard3:eGFP*-injected embryos were not  
486 immunolabeled with anti-GFP.

487

#### 488 **Whole-mount *in situ* hybridization and imaging**

489 *In situ* hybridization was performed as described<sup>59</sup>. *emx3* riboprobe template was generated  
490 by PCR amplification using cDNA from 24hpf embryos.

491 T7 promoter: **TAATACGACTCACTATAGGG**

492

493 *emx3* antisense:

494 FWD: TCCATCCATCCTTCCCCCTT

495 RVS: **TAATACGACTCACTATAGGG**GTGCTGACTGCCTTTCCTCT

496

497 DIG-labeled riboprobes were generated using 2ul of PCR template with the Roche DIG RNA

498 Labeling Kit (T7) (Sigma aldrich, SKU 11277073910)

499 Whole-mount imaging was carried out using a Zeiss Axioscope2 microscope. Embryos were  
500 imaged in a 2.5% glycerol solution.

501

#### 502 **Confocal microscopy**

503 Dorsal view time-lapse microscopy: performed as previously described<sup>60</sup>. Embryos were

504 imaged using a Leica confocal microscope (Leica SP5 TCS 4D) at 15 sec/frame capturing

505 <.5µm of tissue. All fluorescently labeled sections were imaged using a Leica confocal

506 microscope (Leica SP5 TCS 4D).

507 Transverse view time-lapse microscopy: performed as described previously<sup>60</sup>, with the  
508 exception that the embryos were oriented anterior side against the glass. Embryos were  
509 imaged using a Zeiss confocal microscope (Zeiss 900 LSM with Airyscan 2), at 20X.

510

### 511 **Data Quantification**

512 Medial-most-p63-positive-domain migration, Figure 1N: For each hemisphere of a tissue  
513 section, the distance between the medial-most p63 positive nucleus and the midline was  
514 manually scored. For each embryo, measurements were taken from tissue sections ranging  
515 along the anterior-posterior axis of the forebrain.

516

517 Deep layer cell morphology measurements, Figure 3: Cells were manually scored from non-  
518 projected z-stack images, where cellular outlines were visually determined from the mGFP  
519 signal. Cells were labeled as neuroectoderm NF cells based on the fan-like pattern of their  
520 basal projections in contact with the non-neural ectoderm. All other cells scored were within  
521 the morphologically distinct eye vesicle and were labeled as eye field cells. Neural ectoderm  
522 NF cells and eye field cells are not morphologically distinguishable at the 2 somitic stage and  
523 thus were not given cell type identities at that developmental stage.

524

525 Medial hinge cell morphology measurements, Figure 5C: Cells were manually scored from  
526 non-projected z-stack images of the overlay between the labeled actin cytoskeleton  
527 (phalloidin) and nucleus (DAPI, not shown in Figure 5) channels. Cellular outlines were  
528 visually determined from the phalloidin signal. For the nuclear position measurement (Figure  
529 5c3), the distance from the dorsal edge of the nucleus to the basal membrane of the cell was  
530 scored and divided by the total cell length.

531 Cell ratcheting, Figure 6 a1,a2,b1,b2: Live movie z-stacks for the first 35 minutes (~2-4  
532 somites, n=2) of each movie were max projected and cropped so the midline of the tissue  
533 horizontally bisected the image frame. The mGFP signal was then inverted and thresholded  
534 to produce a binary image. Measurements for individual cell surface areas were captured  
535 using the magic wand tool in ImageJ for every frame (15 seconds) until the cell left the field of  
536 view. Plotted on the x-axis is the order of frame measurements (frame 0, frame 1, frame 2,...)  
537 divided by the total number of frames for which that cell was scored to standardize between 0  
538 and 1. Plotted on the y-axis, the initial value of each cell's surface area was subtracted from  
539 all measurements for that cell to initialize surface area's to zero. The data was binned  
540 (bins=50) to obtain median measurements and confidence intervals. Cells that underwent  
541 mitosis anytime during the movie were excluded. Cells were labeled as MHP if their surface  
542 area centroid from the first frame (t=0) was +/- 20  $\mu\text{m}$  from the midline with MHP-adjacent  
543 cells being labeled as such if their centroid was > +/-20  $\mu\text{m}$  from the midline.

544

545 Dorsal view movies of apical surface area oscillations: An oscillation was defined as a cycle  
546 of constriction and then expansion or vice versa. For a given cell, constriction or expansion  
547 was determined by the difference between surface areas for two sequential time frames,  
548 where  $\text{frame\_1\_surface\_area} - \text{frame\_2\_surface\_area} > 0$  was scored as constricting and  $< 0$   
549 was scored as expanding.

550

551 Transverse view movies of cell shape changes: Movies were manually scored at each time  
552 frame to measure the following parameters (n=2, data shown for Supplemental movie 1 only).  
553 Neural groove formation was calculated as the angle formed by the dorsal-most medial tissue

554 (Figure 8G); optic vesicle angle was measured as the angle formed by the outline of the optic  
555 vesicle as it forms (Figure 8H); NF basal angle was calculated as the angle formed by the  
556 basal surface of NF cells (Figure 8I); NF elevation was measured as the distance between  
557 the basal side of NF cells and the apical side of MHP cells (Figure 8J). As the NFs elevate,  
558 that distance decreases and eventually becomes negative as the NFs elevate above the  
559 MHP. Finally, the distance between the NFs was measured as the distance between the  
560 basal side of NF cells, as they migrate towards the midline (Figure 8K).

561

562 *emx3 in situ* hybridization measurements, Figure 10C: The distance between the lateral  
563 edges of the posterior-most extent of the *emx3* domain was manually scored for each  
564 embryo.

565

## 566 **Statistical Analysis**

567 The Mann-Whitney U test was used for all significance testing. The python function  
568 `scipy.stats.mannwhitneyu(alternative='two-sided')` was used to calculate the test statistic and  
569 P-value for each significance test. Graphs were generated using the python Seaborn  
570 package with the following functions: `seaborn.boxplot()`, `seaborn.lmplot()`, `seaborn.violinplot()`,  
571 `seaborn.lineplot()`.

572

## 573 **Data availability**

574 The authors declare that all data supporting the findings of this study are available within the  
575 article and its supplementary information files or from the corresponding author upon  
576 reasonable request.

577 REFERENCES

- 578 1. Copp, A. J., Greene, N. D. E. & Murdoch, J. N. Dishevelled: linking convergent extension  
579 with neural tube closure. *Trends Neurosci.* **26**, 453–455 (2003).
- 580 2. Keller, R. Shaping the vertebrate body plan by polarized embryonic cell movements.  
581 *Science* **298**, 1950–1954 (2002).
- 582 3. Copp, A. J., Greene, N. D. E. & Murdoch, J. N. The genetic basis of mammalian  
583 neurulation. *Nat. Rev. Genet.* **4**, 784–793 (2003).
- 584 4. Morriss-Kay, G. M. Growth and development of pattern in the cranial neural epithelium of  
585 rat embryos during neurulation. *J Embryol Exp Morphol* **65 Suppl**, 225–241 (1981).
- 586 5. Baker, P. C. & Schroeder, T. E. Cytoplasmic filaments and morphogenetic movement in  
587 the amphibian neural tube. *Dev. Biol.* **15**, 432–450 (1967).
- 588 6. Sadler, T. W., Greenberg, D., Coughlin, P. & Lessard, J. L. Actin distribution patterns in  
589 the mouse neural tube during neurulation. *Science* **215**, 172–174 (1982).
- 590 7. Morriss-Kay, G. & Tuckett, F. The role of microfilaments in cranial neurulation in rat  
591 embryos: effects of short-term exposure to cytochalasin D. *J Embryol Exp Morphol* **88**,  
592 333–348 (1985).
- 593 8. Schoenwolf, G. C., Folsom, D. & Moe, A. A reexamination of the role of microfilaments in  
594 neurulation in the chick embryo. *The Anatomical Record* **220**, 87–102 (1988).
- 595 9. Ybot-Gonzalez, P. & Copp, A. J. Bending of the neural plate during mouse spinal  
596 neurulation is independent of actin microfilaments. *Dev. Dyn.* **215**, 273–283 (1999).
- 597 10. Kinoshita, N., Sasai, N., Misaki, K. & Yonemura, S. Apical accumulation of Rho in the  
598 neural plate is important for neural plate cell shape change and neural tube formation.  
599 *Mol. Biol. Cell* **19**, 2289–2299 (2008).
- 600 11. Hildebrand, J. D. & Soriano, P. Shroom, a PDZ domain-containing actin-binding protein, is  
601 required for neural tube morphogenesis in mice. *Cell* **99**, 485–497 (1999).
- 602 12. Xu, W., Baribault, H. & Adamson, E. D. Vinculin knockout results in heart and brain  
603 defects during embryonic development. *Development* **125**, 327–337 (1998).
- 604 13. Haigo, S. L., Hildebrand, J. D., Harland, R. M. & Wallingford, J. B. Shroom induces apical  
605 constriction and is required for hingepoint formation during neural tube closure. *Curr. Biol.*  
606 **13**, 2125–2137 (2003).
- 607 14. Itoh, K., Ossipova, O. & Sokol, S. Y. GEF-H1 functions in apical constriction and cell  
608 intercalations and is essential for vertebrate neural tube closure. *J. Cell. Sci.* **127**, 2542–  
609 2553 (2014).
- 610 15. Rolo, A., Skoglund, P. & Keller, R. Morphogenetic movements driving neural tube closure  
611 in *Xenopus* require myosin IIB. *Developmental Biology* **327**, 327–338 (2009).
- 612 16. Lawson, A., Anderson, H. & Schoenwolf, G. C. Cellular mechanisms of neural fold  
613 formation and morphogenesis in the chick embryo. *Anat. Rec.* **262**, 153–168 (2001).
- 614 17. Colas, J. F. & Schoenwolf, G. C. Towards a cellular and molecular understanding of  
615 neurulation. *Dev. Dyn.* **221**, 117–145 (2001).
- 616 18. Pyrgaki, C., Trainor, P., Hadjantonakis, A.-K. & Niswander, L. Dynamic imaging of  
617 mammalian neural tube closure. *Dev. Biol.* **344**, 941–947 (2010).
- 618 19. Ray, H. J. & Niswander, L. A. Dynamic behaviors of the non-neural ectoderm during  
619 mammalian cranial neural tube closure. *Dev. Biol.* **416**, 279–285 (2016).
- 620 20. Rolo, A. *et al.* Regulation of cell protrusions by small GTPases during fusion of the neural  
621 folds. *Elife* **5**, e13273 (2016).



- 622 21. Geelen, J. A. & Langman, J. Closure of the neural tube in the cephalic region of the  
623 mouse embryo. *Anat. Rec.* **189**, 625–640 (1977).
- 624 22. Geelen, J. A. & Langman, J. Ultrastructural observations on closure of the neural tube in  
625 the mouse. *Anat. Embryol.* **156**, 73–88 (1979).
- 626 23. Massarwa, R., Ray, H. J. & Niswander, L. Morphogenetic movements in the neural plate  
627 and neural tube: mouse. *Wiley Interdiscip Rev Dev Biol* **3**, 59–68 (2014).
- 628 24. Waterman, R. E. Topographical changes along the neural fold associated with neurulation  
629 in the hamster and mouse. *Am. J. Anat.* **146**, 151–171 (1976).
- 630 25. Criley, B. B. Analysis of embryonic sources and mechanisms of development of posterior  
631 levels of chick neural tubes. *J. Morphol.* **128**, 465–501 (1969).
- 632 26. Griffith, C. M., Wiley, M. J. & Sanders, E. J. The vertebrate tail bud: three germ layers  
633 from one tissue. *Anat. Embryol.* **185**, 101–113 (1992).
- 634 27. Kimmel, C. B., Ballard, W. W., Kimmel, S. R., Ullmann, B. & Schilling, T. F. Stages of  
635 embryonic development of the zebrafish. *Dev. Dyn.* **203**, 253–310 (1995).
- 636 28. Papan, C. & Campos-Ortega, J. A. On the formation of the neural keel and neural tube in  
637 the zebrafish *Danio (Brachydanio) rerio*. *Roux's Arch. Dev. Biol.* **203**, 178–186 (1994).
- 638 29. Hong, E. & Brewster, R. N-cadherin is required for the polarized cell behaviors that drive  
639 neurulation in the zebrafish. *Development* **133**, 3895–3905 (2006).
- 640 30. Strähle, U. & Blader, P. Early neurogenesis in the zebrafish embryo. *FASEB J.* **8**, 692–  
641 698 (1994).
- 642 31. Reichenbach, A., Schaaf, P. & Schneider, H. Primary neurulation in teleosts--evidence for  
643 epithelial genesis of central nervous tissue as in other vertebrates. *J Hirnforsch* **31**, 153–  
644 158 (1990).
- 645 32. Miyayama, Y. & Fujimoto, T. Fine morphological study of neural tube formation in the  
646 teleost, *Oryzias latipes*. *Okajimas Folia Anat Jpn* **54**, 97–120 (1977).
- 647 33. Lowery, L. A. & Sive, H. Strategies of vertebrate neurulation and a re-evaluation of teleost  
648 neural tube formation. *Mech. Dev.* **121**, 1189–1197 (2004).
- 649 34. Schmidt, R., Strähle, U. & Scholpp, S. Neurogenesis in zebrafish - from embryo to adult.  
650 *Neural Dev* **8**, 3 (2013).
- 651 35. Cearns, M. D., Escuin, S., Alexandre, P., Greene, N. D. E. & Copp, A. J. Microtubules,  
652 polarity and vertebrate neural tube morphogenesis. *J. Anat.* **229**, 63–74 (2016).
- 653 36. Yamaguchi, Y. & Miura, M. How to form and close the brain: insight into the mechanism of  
654 cranial neural tube closure in mammals. *Cell. Mol. Life Sci.* **70**, 3171–3186 (2013).
- 655 37. Ivanovitch, K., Cavodeassi, F. & Wilson, S. W. Precocious acquisition of neuroepithelial  
656 character in the eye field underlies the onset of eye morphogenesis. *Dev. Cell* **27**, 293–  
657 305 (2013).
- 658 38. England, S. J., Blanchard, G. B., Mahadevan, L. & Adams, R. J. A dynamic fate map of  
659 the forebrain shows how vertebrate eyes form and explains two causes of cyclopia.  
660 *Development* **133**, 4613–4617 (2006).
- 661 39. Viktorin, G., Chiuchitu, C., Rissler, M., Varga, Z. M. & Westerfield, M. *Emx3* is required for  
662 the differentiation of dorsal telencephalic neurons. *Dev. Dyn.* **238**, 1984–1998 (2009).
- 663 40. Schroeder, T. E. Neurulation in *Xenopus laevis*. An analysis and model based upon light  
664 and electron microscopy. *J Embryol Exp Morphol* **23**, 427–462 (1970).
- 665 41. Suzuki, M., Morita, H. & Ueno, N. Molecular mechanisms of cell shape changes that  
666 contribute to vertebrate neural tube closure. *Dev. Growth Differ.* **54**, 266–276 (2012).



- 667 42. Smith, J. L. & Schoenwolf, G. C. Cell cycle and neuroepithelial cell shape during bending  
668 of the chick neural plate. *Anat. Rec.* **218**, 196–206 (1987).
- 669 43. Smith, J. L. & Schoenwolf, G. C. Role of cell-cycle in regulating neuroepithelial cell shape  
670 during bending of the chick neural plate. *Cell Tissue Res.* **252**, 491–500 (1988).
- 671 44. Lee, J.-Y. & Harland, R. M. Endocytosis is required for efficient apical constriction during  
672 *Xenopus* gastrulation. *Curr. Biol.* **20**, 253–258 (2010).
- 673 45. Gutzman, J. H., Sahu, S. U. & Kwas, C. Non-muscle myosin IIA and IIB differentially  
674 regulate cell shape changes during zebrafish brain morphogenesis. *Dev. Biol.* **397**, 103–  
675 115 (2015).
- 676 46. Araya, C. *et al.* Cdh2 coordinates Myosin-II dependent internalisation of the zebrafish  
677 neural plate. *Sci Rep* **9**, 1835 (2019).
- 678 47. Karfunkel, P. The activity of microtubules and microfilaments in neurulation in the chick. *J.*  
679 *Exp. Zool.* **181**, 289–301 (1972).
- 680 48. Lee, C., Scherr, H. M. & Wallingford, J. B. Shroom family proteins regulate gamma-tubulin  
681 distribution and microtubule architecture during epithelial cell shape change.  
682 *Development* **134**, 1431–1441 (2007).
- 683 49. Sawyer, J. M. *et al.* Apical constriction: a cell shape change that can drive  
684 morphogenesis. *Dev. Biol.* **341**, 5–19 (2010).
- 685 50. Martin, A. C., Kaschube, M. & Wieschaus, E. F. Pulsed contractions of an actin-myosin  
686 network drive apical constriction. *Nature* **457**, 495–499 (2009).
- 687 51. Martin, A. C. & Goldstein, B. Apical constriction: themes and variations on a cellular  
688 mechanism driving morphogenesis. *Development* **141**, 1987–1998 (2014).
- 689 52. Solon, J., Kaya-Copur, A., Colombelli, J. & Brunner, D. Pulsed forces timed by a ratchet-  
690 like mechanism drive directed tissue movement during dorsal closure. *Cell* **137**, 1331–  
691 1342 (2009).
- 692 53. Suzuki, M. *et al.* Distinct intracellular Ca<sup>2+</sup> dynamics regulate apical constriction and  
693 differentially contribute to neural tube closure. *Development* **144**, 1307–1316 (2017).
- 694 54. McShane, S. G. *et al.* Cellular basis of neuroepithelial bending during mouse spinal  
695 neural tube closure. *Dev. Biol.* **404**, 113–124 (2015).
- 696 55. Zohn, I. E., Anderson, K. V. & Niswander, L. The Hectd1 ubiquitin ligase is required for  
697 development of the head mesenchyme and neural tube closure. *Dev. Biol.* **306**, 208–221  
698 (2007).
- 699 56. Nikolopoulou, E., Galea, G. L., Rolo, A., Greene, N. D. E. & Copp, A. J. Neural tube  
700 closure: cellular, molecular and biomechanical mechanisms. *Development* **144**, 552–566  
701 (2017).
- 702 57. von Trotha, J. W., Campos-Ortega, J. A. & Reugels, A. M. Apical localization of  
703 ASIP/PAR-3:EGFP in zebrafish neuroepithelial cells involves the oligomerization domain  
704 CR1, the PDZ domains, and the C-terminal portion of the protein. *Dev. Dyn.* **235**, 967–  
705 977 (2006).
- 706 58. Strehlow, D., Heinrich, G. & Gilbert, W. The fates of the blastomeres of the 16-cell  
707 zebrafish embryo. *Development* **120**, 1791–1798 (1994).
- 708 59. Thisse, C., Thisse, B., Schilling, T. F. & Postlethwait, J. H. Structure of the zebrafish  
709 snail1 gene and its expression in wild-type, spadetail and no tail mutant embryos.  
710 *Development* **119**, 1203–1215 (1993).
- 711 60. Jayachandran, P., Hong, E. & Brewster, R. Labeling and imaging cells in the zebrafish  
712 hindbrain. *J Vis Exp* (2010) doi:10.3791/1976.

713 **ACKNOWLEDGEMENTS**

714 Funds from Howard Hughes Medical Institute through the UMBC Precollege and  
715 Undergraduate Science Education Program supported J. Werner and D. Brooks. Funds from  
716 NIH/NIGMS grants # T32-GM055036 and # R25-GM066706 and NSF LSAMP BD grant #  
717 1500511 to UMBC supported M. Negesse. Funds from NSF LSAMP grant # 1619676 to  
718 UMBC supported J. Johnson. Funds from NIH/NIGMS MARCU\*STAR T34 grant # HHS  
719 00026 to UMBC supported D. Brooks and A. Caldwell. We thank the following people for their  
720 contributions: Tagide deCarvalho for her help with confocal imaging and image processing;  
721 Corinne Houart for the *Tg(emx3:YFP)<sup>b1200</sup>* transgenic line; Jennifer Gutzman for the gift of  
722 *myh10* morpholino and Mark Van Doren for his comments on the manuscript.

723 **AUTHOR CONTRIBUTIONS**

724 J.W. and M.N. contributed equally to this study.  
725 J.W. designed and performed experiments and carried out data analysis. M.N. carried out  
726 experiments and data analysis, annotated movie files and generated illustrations. D.B. and  
727 A.C. contributed to the experiments and analysis of cell polarity and myosin function. J.J.  
728 contributed to the analysis of myosin function. R.B. oversaw experimental design and  
729 analysis and wrote the manuscript.

730 **COMPETING INTERESTS**

731 The authors declare no competing interests

732 **MATERIALS AND CORRESPONDENCE**

733 Rachel Brewster

734  
735  
736

## FIGURES

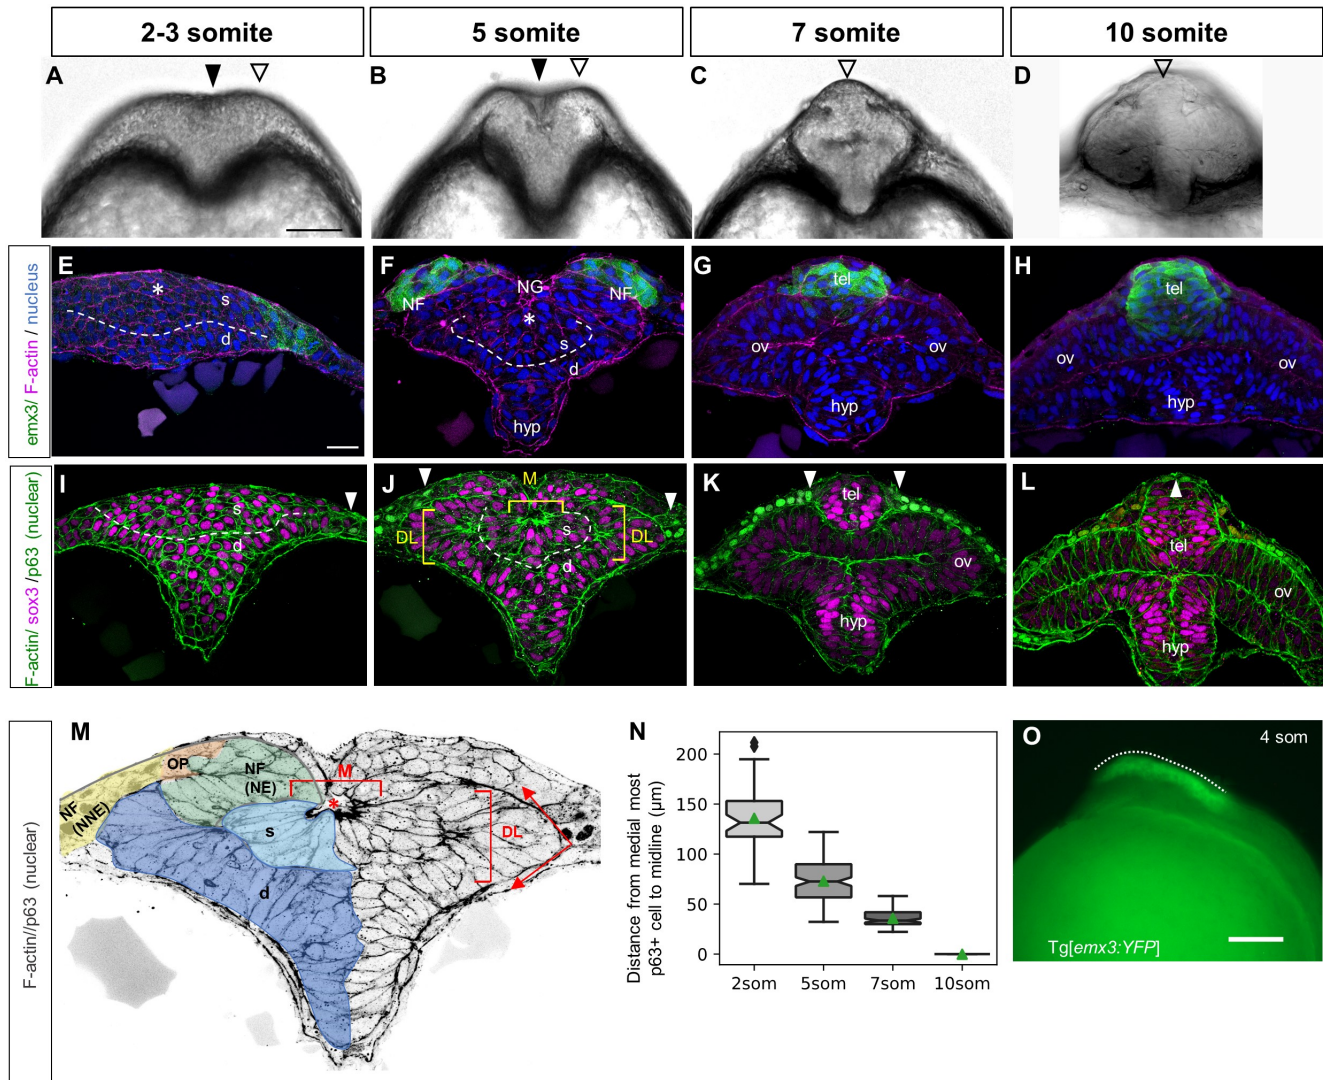

737  
738  
739  
740  
741  
742  
743  
744  
745  
746  
747  
748  
749  
750  
751  
752  
753

**Figure 1. Hingepoints and neural folds contribute to forebrain morphogenesis.** (A-D) Optical sections at the level of the forebrain of WT embryos at the 2-3 som (A), 5 som (B), 7 som (C) and 10 som (D) stages. (E-L) Transverse sections through the ANP of 2-3 som (E, I), 5 som (F, J), 7 som (G, K) and 10 som (H, L) embryos. (E-H) Tg[emx3:YFP] embryos labeled with anti-GFP (green), phalloidin (F-actin, magenta) and DAPI (nuclei, blue). (I-L) WT embryos labeled with phalloidin (F-actin, green), anti-Sox3 (magenta) and anti-p63 (nuclear, green). (M) Higher magnification image of panel J, grey scaled to reveal F-actin and p63 and pseudo-colored - color code: light blue: superficial eye field cells, dark blue: deep layer cells that apically constrict to form the optic vesicles, green: neural component of the neural fold, orange: olfactory placode (Sox3/p63-negative cells), yellow: non-neural component of the neural fold. (N) Measurements of neural fold convergence, scored as the distance between the medial-most p63-positive cells on either side of the midline at different developmental stages. Notches depict the 95% confidence interval around the median and the green triangle depicts the distribution mean. 2 som: 48 measurements from 14 embryos, mean= 136; 5 som: 144 measurements from 16 embryos, mean=73.0; 7 som: 87 measurements from 10 embryos, mean=36.0; 10 som: p63 domain is fused, no measurements. Statistical analysis: Mann-Whitney U tests, two-sided; 2 som vs 5 som :  $P = 1.18e^{-21}$ ; 2 som vs 7 som :  $P = 8.35e^{-22}$ ; 5 som vs 7 som :  $P = 2.14e^{-31}$ . (O) Side view of a 4 som

754 Tg[*emx3:YFP*] embryo. Abbreviations: s = superficial layer; d = deep layer; NF = neural fold; NG = neural  
755 groove; hyp = hypothalamus; tel = telencephalon; ov = optic vesicle; DL = Dorso-lateral hingepoints; M = Medial  
756 hingepoint; OP = olfactory placode; NE = neural ectoderm; NNE = non-neural ectoderm. Annotations: black  
757 arrowhead = median groove, white open arrowhead = elevated neural fold-like structure, dashed line =  
758 separation of the deep and superficial layers; brackets = hingepoints; dotted line = A-P range of the neural folds;  
759 white arrowhead = medial-most epidermis; red asterisk = neuropore. Scale bars: A and O= 100  $\mu$ m, E= 25  $\mu$ m.



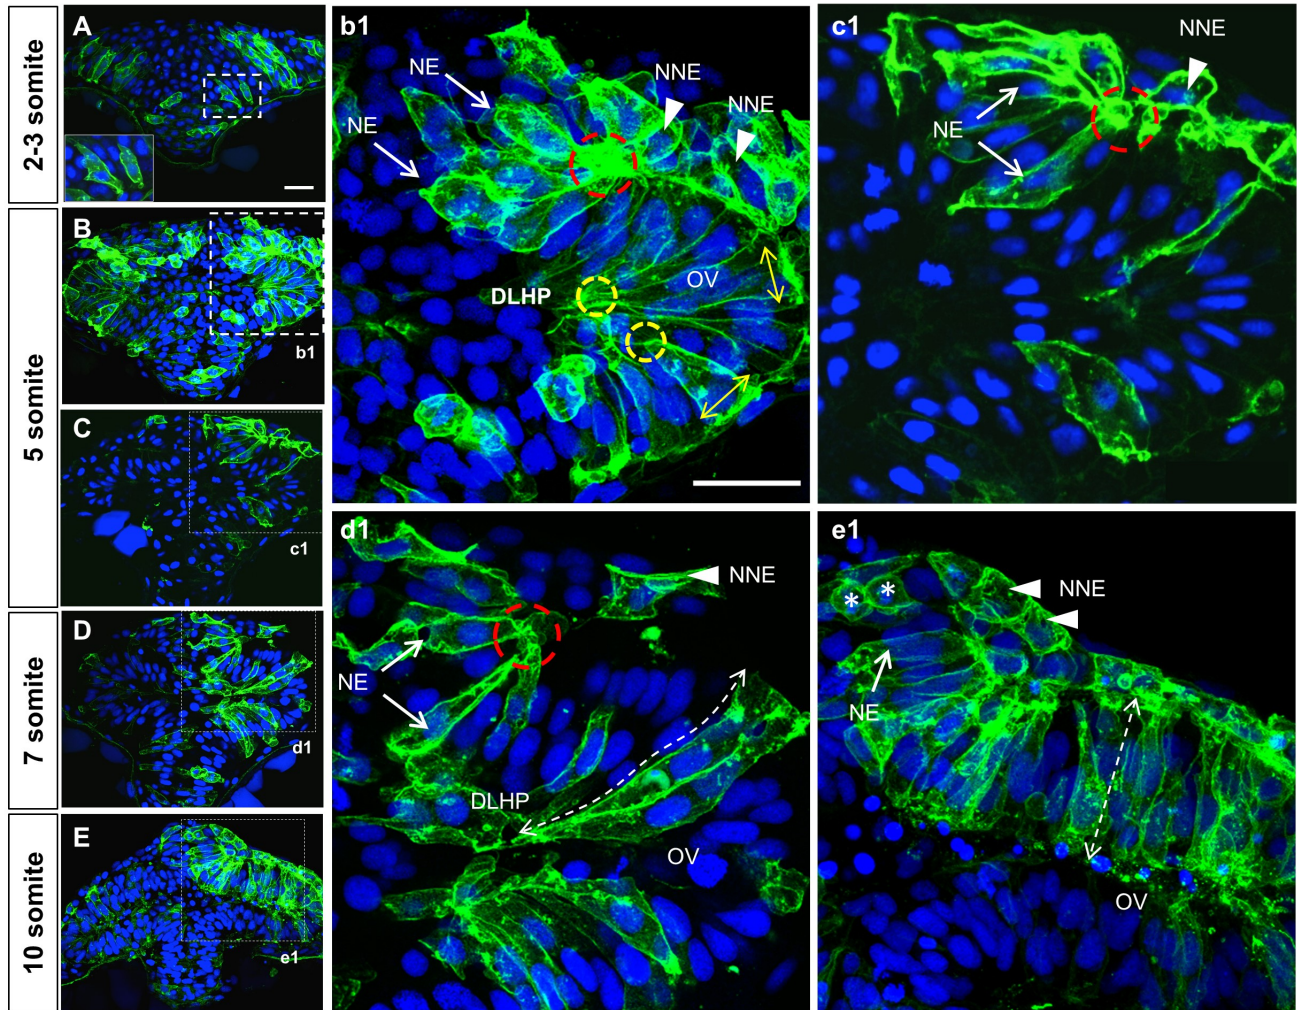

760  
 761 **Figure 2. Cell shape changes in the deep layer of the ANP that contribute to DLHP and neural fold**  
 762 **formation.** (A-E) Transverse section, at the level of the forebrain, of embryos at the 2-3 (A), 5 (B, b1, C, c1), 7  
 763 (D, d1) and 10 (E, e1) somite stages mosaically-expressing mGFP (green) and labeled with the nuclear marker  
 764 DAPI (blue). The inset in A is a higher magnification of dashed area in A. (b1-e1) Higher magnifications of  
 765 regions delineated by dotted lines in (A-E). Annotations: red dashed circle = basal constriction of NE component  
 766 of neural fold; yellow circle = apical constriction of DLHP cells; arrows = NE component of neural fold;  
 767 arrowheads = NNE component of neural folds; double dashed arrow = elongated deep cells of the optic vesicle,  
 768 asterisks = dividing cells in the prospective telencephalon. Scale bars: 25  $\mu$ m in A and b1.

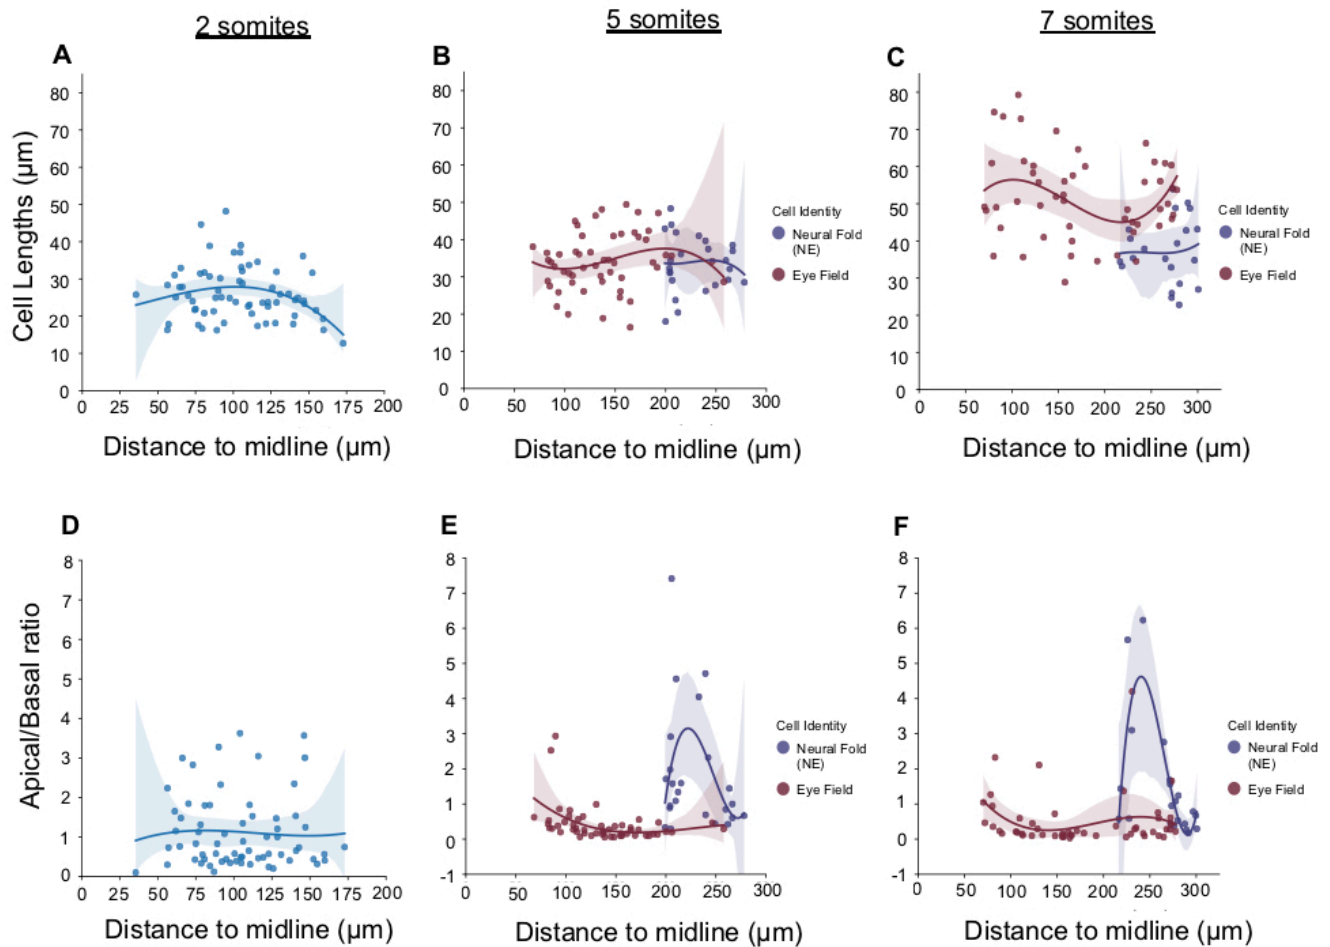

769  
770  
771  
772  
773  
774  
775  
776  
777  
778  
779

**Figure 3. Measurements of cell shape changes in the deep neuroectodermal layer and neural folds.** (A-C) Measurements of cell lengths (μm, Y axis) of m-GFP-labeled cells at different positions relative to the ANP midline (μm, X axis). Measurements begin in the region fated to become the optic vesicles. (D-F) Measurements of the apico:basal surface ratio of m-GFP-labeled cells at different positions relative to the ANP midline (μm, X axis). Measurements begin in the region fated to form the optic vesicles. The original scatter plot was fitted to a 3<sup>rd</sup> degree polynomial. Confidence intervals for the polynomial are 95% and were calculated with bootstrap sampling (n=1000). Color code: blue = neuroectodermal cells of the deep layer of 2 somite stage embryos that are not yet identifiable based on cellular morphology; red = cells that form the optic vesicles; blue = cells that form the neuroectodermal component of the neural folds.

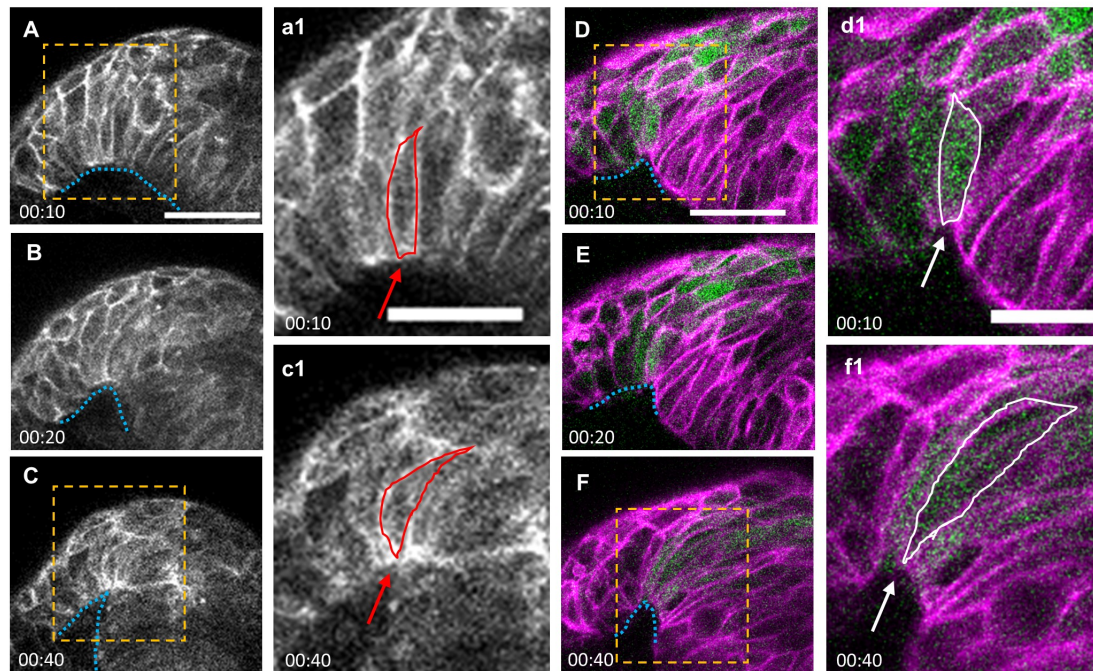

780  
781  
782  
783  
784  
785  
786  
787

**Figure 4. Dynamics of neural fold formation.** A-F. Time lapse movie frames of the ANP, from a transverse view. A-C. Still frames of an embryo expressing membrane Kaede (mKaede). D-F. Still frames of a *Tg[emx3:YFP]* embryo expressing membrane RFP (mRFP, pseudo labeled magenta) and YFP (green). Yellow boxes in A, C, D and F identify magnified areas in a1, c1, d1 and f1. Annotations: blue dotted line: outlines the basal side of the neural folds; red and white lines identify individual neural fold cells; arrows: indicate narrowing surface in neural folds cells. Scale bars: 50  $\mu\text{m}$  in A and D; 25  $\mu\text{m}$  in a1 and d1.



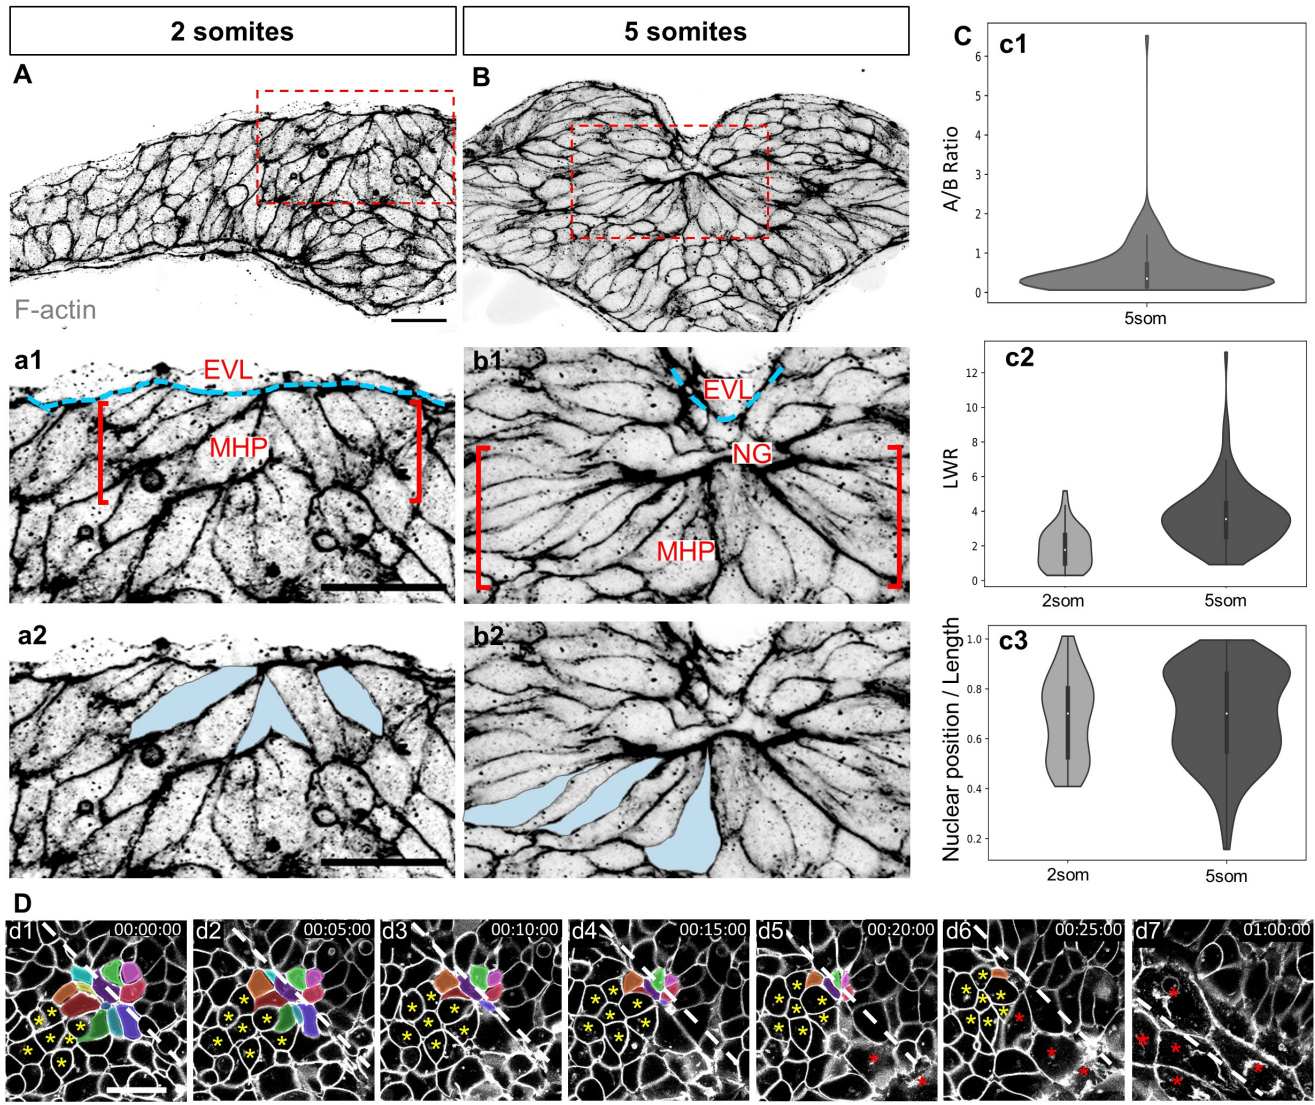

788  
789  
790  
791  
792  
793  
794  
795  
796  
797  
798  
799  
800  
801  
802  
803  
804  
805

**Figure 5. Apical constriction of MHP cells.** (A-b2) Transverse sections through the ANP at the 2 (A, a1, a2) and 5 (B, b1, b2) som stages labeled with phalloidin (shown in greyscale). (a1-b2) are higher magnifications of the boxed areas in A and B, revealing the organization of the medial ANP (a1, b1) and the shape of individual MHP cells pseudo-colored in blue (a2, b2). (C) Quantitation of cell shape changes. Boxplot elements depict quartiles with the centerline depicting the median. (c1) Measurements of apical:basal surface ratio at 5 som (n= 115 cells from 4 embryos, mean=0.548). (c2) Measurement of length-to-width (LWR) ratio at 2 som (n= 47 cells from 5 embryos, mean=1.88) and 5 som (same cells as in c1, mean=3.70). A Mann-Whitney two-sided U Test revealed that the LWR increase between 2 som and 5 som is statistically significant ( $P = 7.80e^{-11}$ ). (c3) Relative position of nucleus at 2 and 5 som measured in the same cell populations (c2). Mean nuclear position/cell length (0.682 at 2 som vs 0.696 at 5 som) is not statistically significant using a Mann Whitney U test ( $P=0.419$ ). (D) Still frames of time lapse movie of m-GFP labeled embryo imaged from a dorsal view. Individual MHP cells are pseudo-colored, A cluster of cells adjacent to the MHP is indicated with yellow asterisks and EVL cells are labeled with red asterisks. Abbreviations: EVL = enveloping layer; MHP = medial hinge point; NG = neural groove. Annotations: white dashed line= midline, red brackets = MHP region, blue dashed lines = outlines EVL, yellow asterisks: cells adjacent to MHP, red asterisks: EVL cells. Scale bars: 25  $\mu$ m in A, a1 and a2; 10  $\mu$ m in d1.



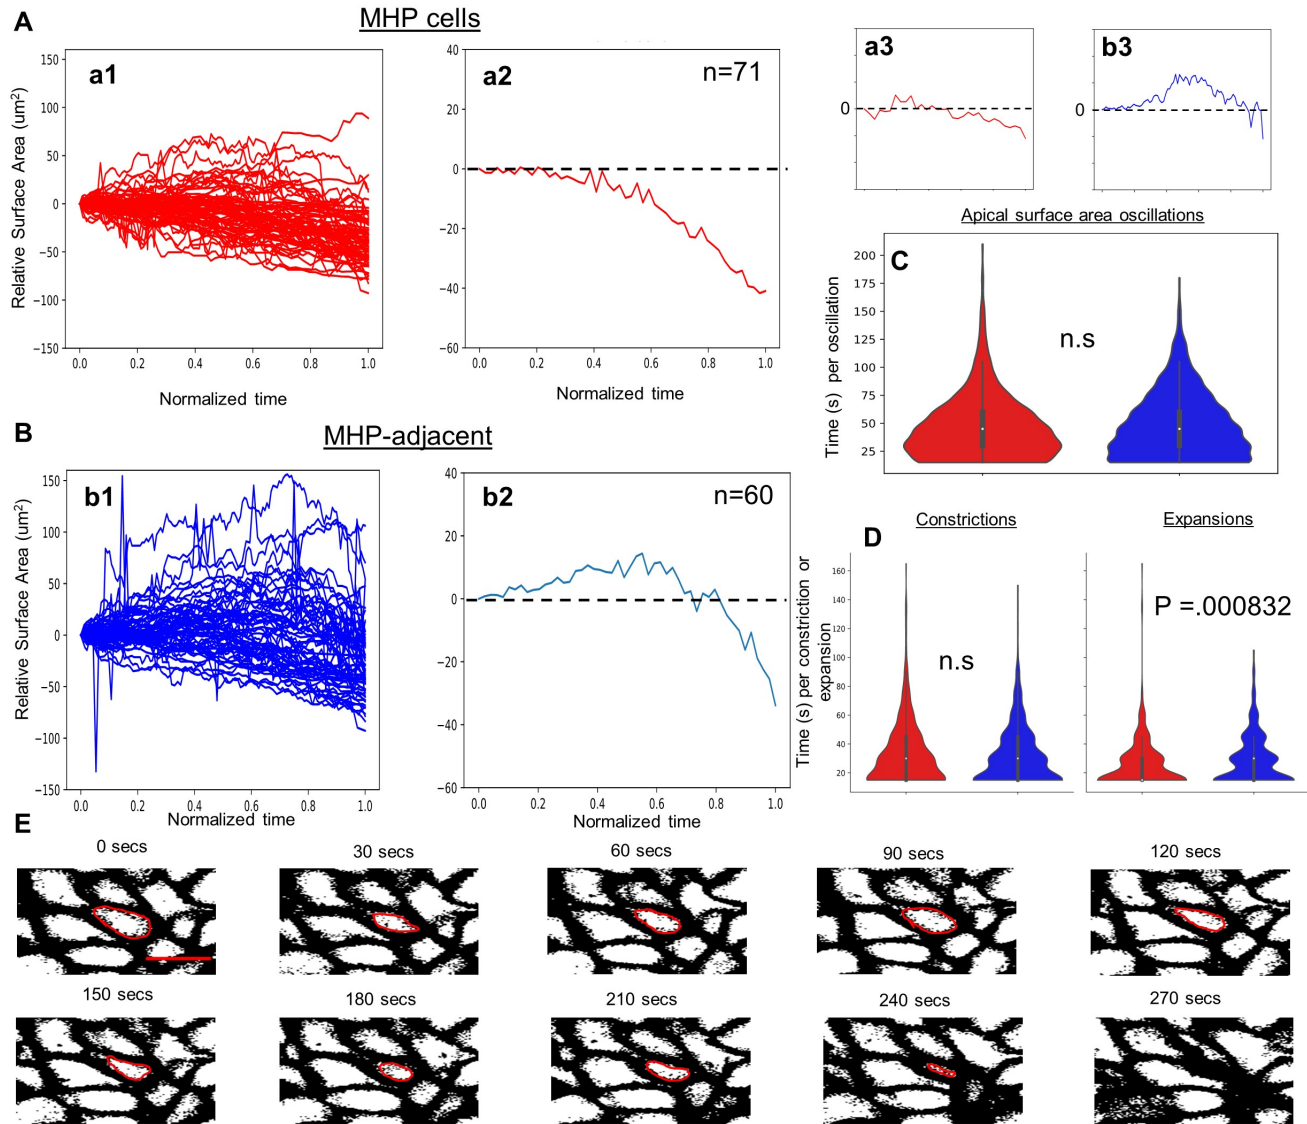

806  
807

808 **Figure 6. Oscillatory constriction with decreasing amplitude reduces the apical surface of MHP cells.** (A)  
809 Measurements of medial, MHP cells. (a1) Relative apical surface areas over time for individual MHP cells. (a2)  
810 Median values of MHP relative apical surface areas over time, 95% confidence interval, n=71. (a3)  
811 Representative trace of relative apical surface area over time for an individual MHP cell. (B) Measurements of  
812 MHP-adjacent cells. (b1) Relative apical surface areas over time for individual MHP-adjacent cells. (b2) Median  
813 values of MHP-adjacent relative apical surface areas over time, 95% confidence interval. (b3) Representative  
814 trace of relative apical surface area over time for an individual MHP-adjacent cell. (C) Distributions of the  
815 duration of oscillation between two expanded states for MHP cells (red, median of 45 seconds per oscillation)  
816 and MHP-adjacent cells (blue, median of 45 seconds per oscillation). No significant difference (two-sided Mann  
817 Whitney U test,  $P=0.293$ ,  $n=758$  MHP cell oscillations,  $n=1,113$  MHP-adjacent oscillations). (D) Distributions of  
818 the timing of apical constrictions or expansions for MHP cells (red) and MHP-adjacent cells (blue). There is no  
819 significant difference between the two groups for constriction time (two-sided Mann Whitney U test:  
820 constrictions,  $P=0.541$ ,  $n=458$  MHP cell constrictions,  $n=640$  MHP-adjacent constrictions) but there is a  
821 statistically significant difference for expansion time ( $P = 0.000832$ ,  $n=367$  MHP-cell expansions,  $n=596$  MHP-  
822 adjacent expansions). The median time for individual expansions of MHP and MHP-adjacent cells is 15 and 30  
823 seconds respectively. All boxplot elements depict quartiles with the centerline depicting the median. (E) Still  
824 frames of time-lapse movie of m-GFP labeled cells shown in grey-scale. The oscillatory behavior of one cell,  
825 outlined in red, is shown over time. Scale bar: 10  $\mu\text{m}$  in c1.

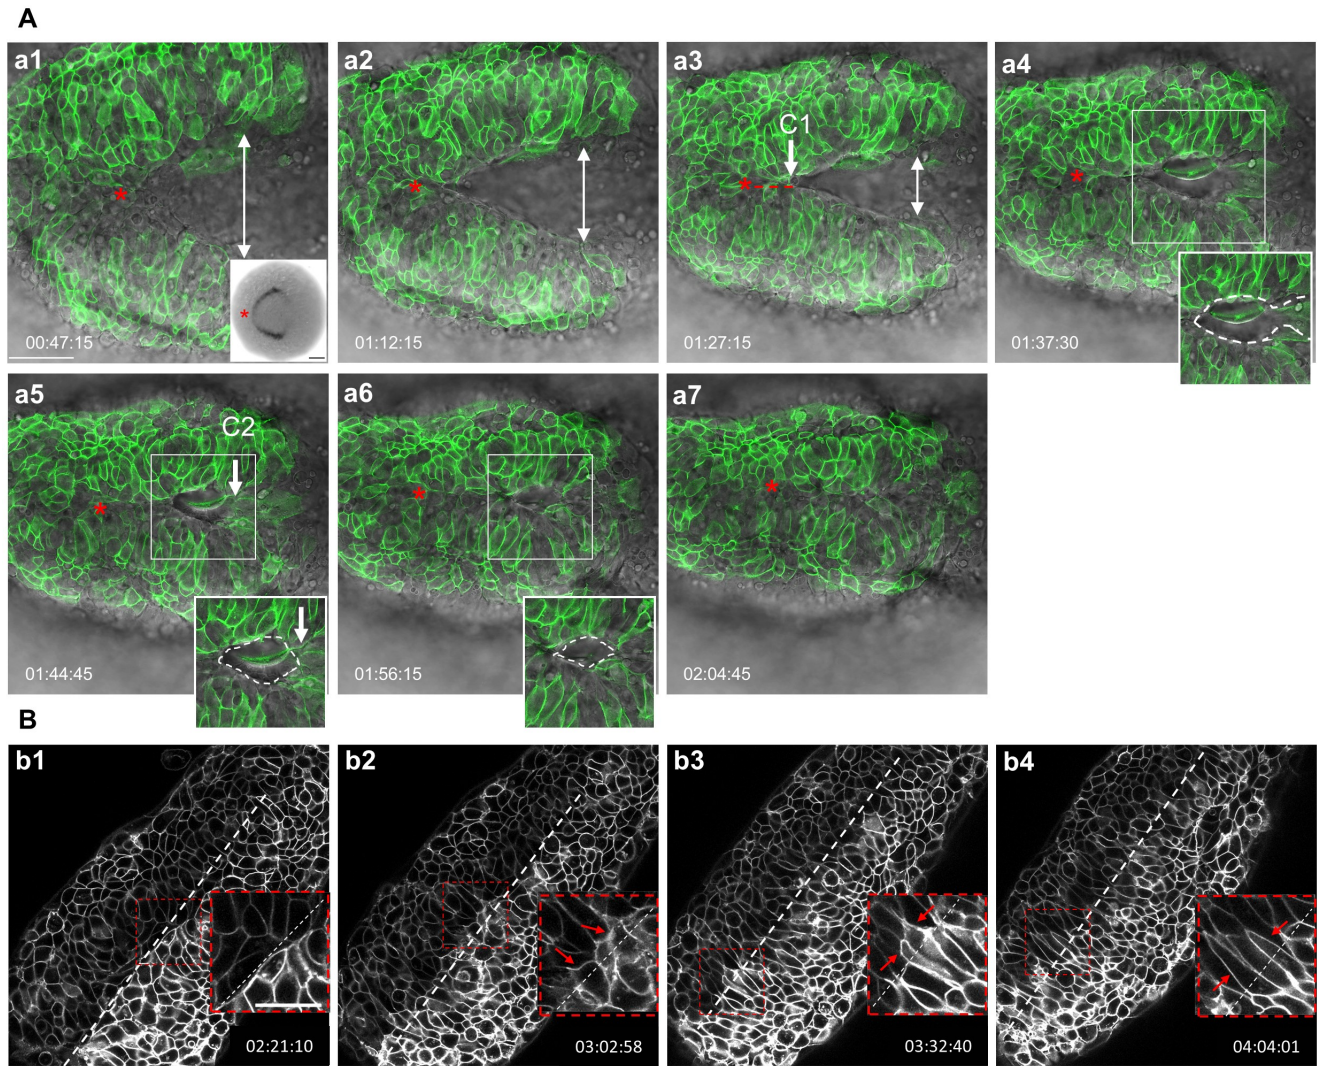

826  
827  
828  
829  
830  
831  
832  
833  
834  
835  
836  
837  
838  
839  
840  
841

**Figure 7. Dynamics of neural fold fusion.** (A, a1-a7) Time lapse movie frames of an embryo expressing mosaic GFP, imaged from a dorsal view, showing the initiation of neural tube closure. Images are overlays of the green and brightfield channels. Inset in a1 shows a dorsal view of an *emx3*-labeled embryo. Insets in a4-a6 outline the eye-shaped opening that forms between closure sites one (CP1) and two (CP2) (B) Grey-scale time-lapse movie frames of an mGFP-labeled embryo imaged from a dorsal view, revealing the final stages of neural fold fusion. Insets in the lower right corner of panels b1-b4 are higher magnification views of boxed areas. Abbreviations: C1, C2: closure sites one and two. Annotations: red asterisk: apex of the neural fold arc; red dotted line: synchronous and posteriorly-directed neural fold fusion anterior to closure point one; white double arrows: distance between the neural folds; white dotted oval: eye shaped opening, the corners of which are defined by closure points one and two; white dotted line: embryonic midline; red arrows: filopodia extending across the midline; time-elapse is shown at the bottom of each panel. Scale bars: 50  $\mu$ m in a1, 100  $\mu$ m in a1 inset, and 25  $\mu$ m in b1.



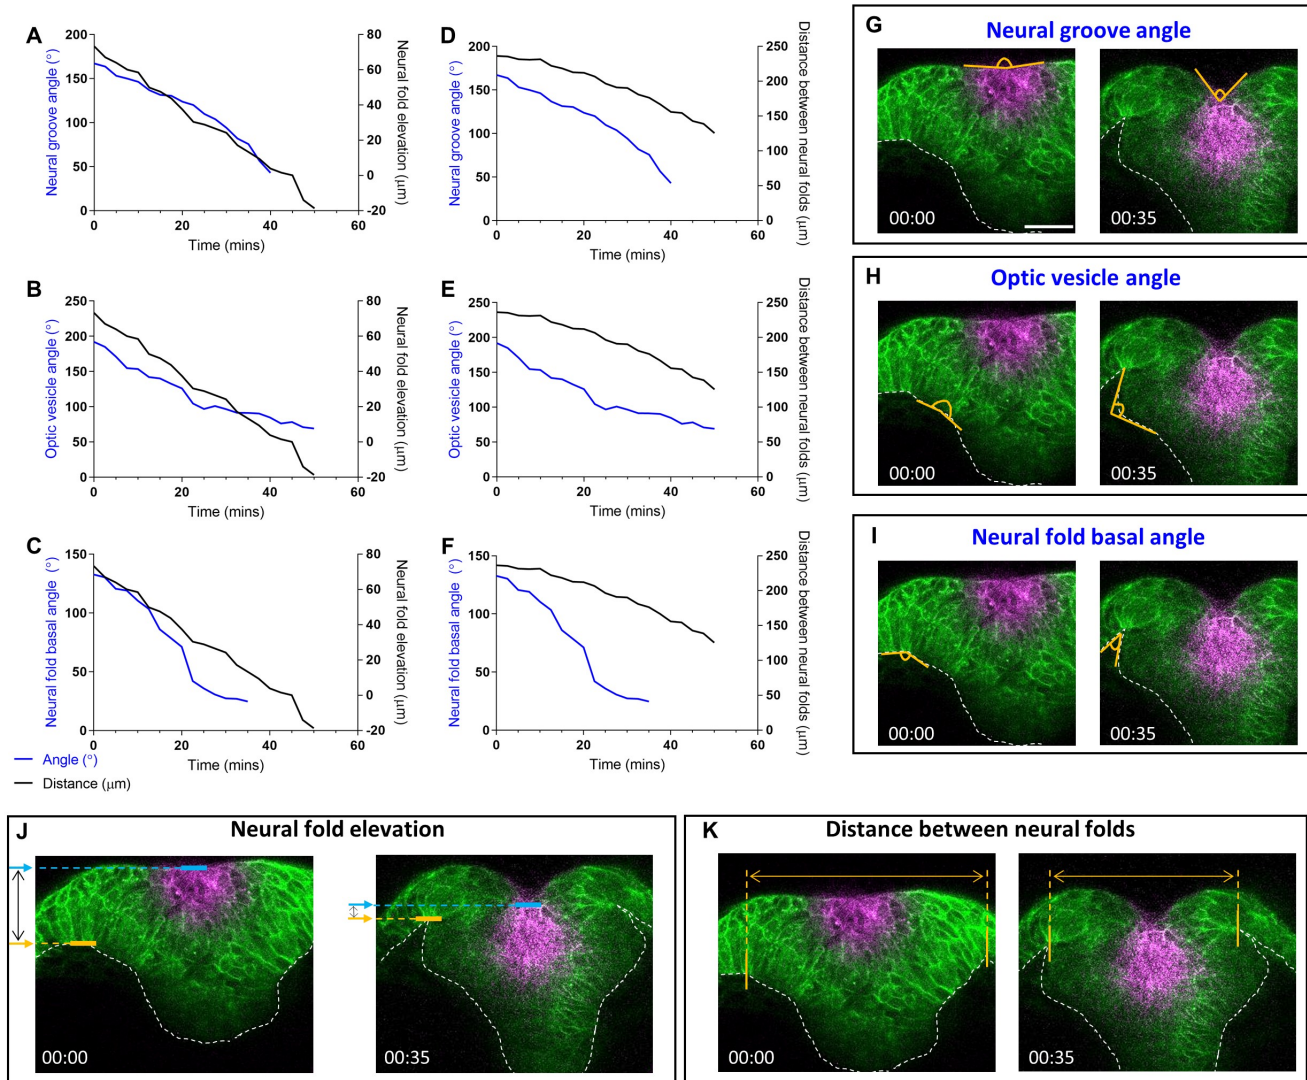

842  
843  
844  
845  
846  
847  
848  
849  
850  
851  
852  
853  
854  
855  
856

**Figure 8. Dynamics of anterior neurulation.** A-F. Graphs illustrating the dynamics of neural groove formation (left Y axis, blue line in A and D), optic vesicle angle (left Y axis, blue line in B and E) and neural fold basal angle (left Y axis, blue line in C and F) as compared to neural fold elevation (right Y axis, black line in A-C) and distance between the neural folds (right Y axis, black line in D-F) over time (X axis). G-K. Still frames of an embryo expressing mKaede (green), in which the MHP cells were photoconverted (magenta), showing how the measurements in graphs A-F were acquired, at two discrete time points. G. The neural groove was measured as the angle formed by the dorsal most tissue. H. The optic vesicle angle was measured as the angle formed by the outline of the optic vesicle as it forms. I. The neural fold basal angle was calculated as the angle formed by the basal side of neural fold cells. J. Neural fold elevation was measured as the distance between the basal side of neural fold cells and the apical side of MHP cells. As the neural folds elevate, that distance decreases and eventually becomes negative as the neural folds elevate above the MHP. K. Distance between the neural folds was measured as the distance between the basal side of neural fold cells. Scale bar: 50 μm.

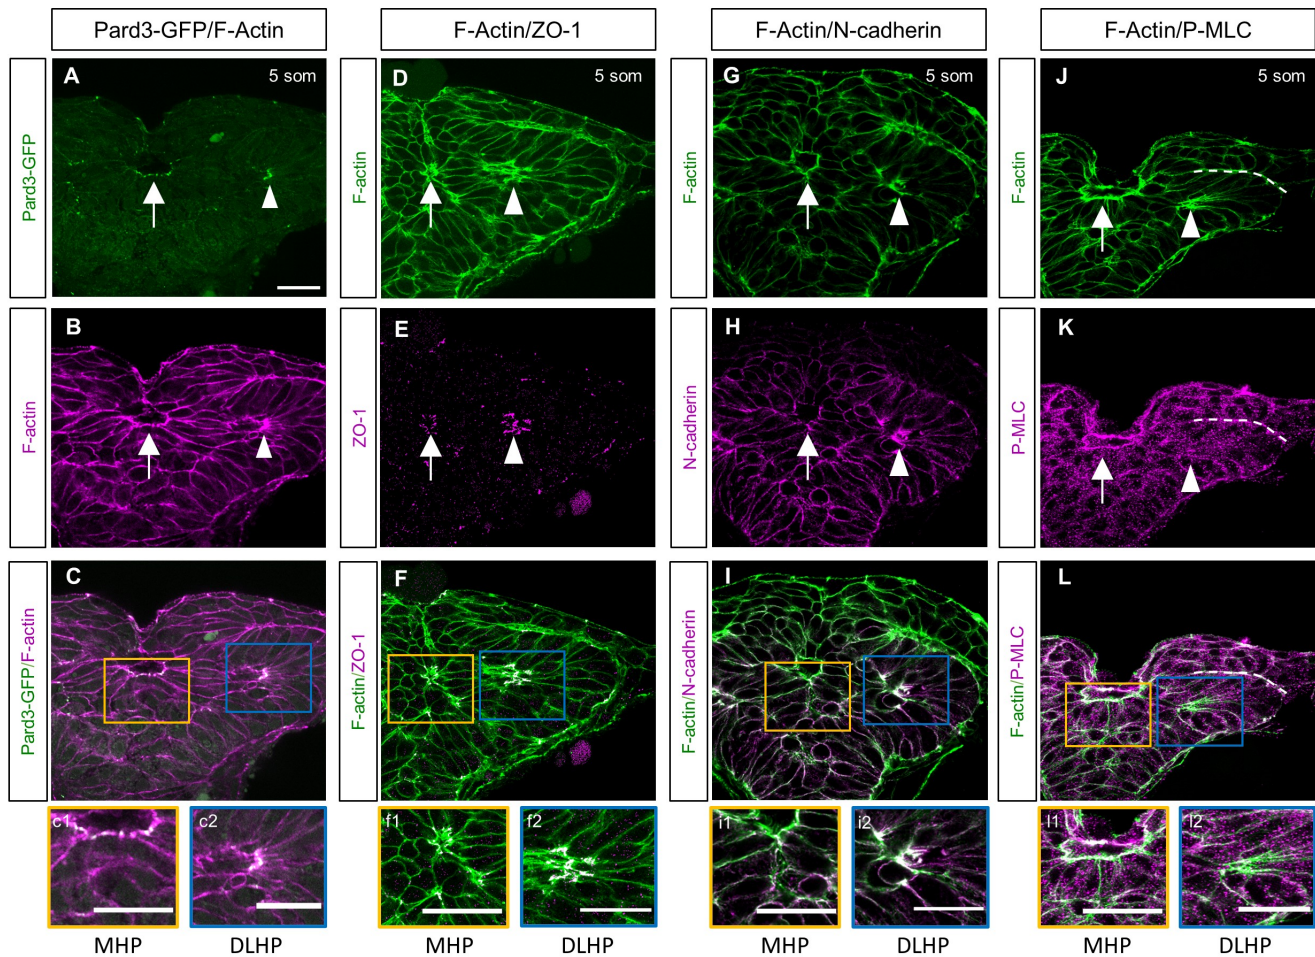

857  
858  
859  
860  
861  
862  
863  
864

**Figure 9. Molecular characterization of the MHP.** (A-L). Transverse sections through the ANP at the 5som stage. Embryos double-labeled with Pard3-GFP (green) and phalloidin (F-actin, magenta) (A-c2); ZO-1 (magenta) and F-actin (green) (D-f2); N-cadherin (magenta) and F-actin (green) (G-i2); and with anti-P-MLC (magenta) and F-actin (green) (J-l2). (C, F, I, L) Magenta and green channel overlay. Insets show higher magnification images of the MHP (yellow box) and DLHP (blue box). Annotations: arrow = MHP; arrowhead = DLHP; dotted line (in J-L) = interface between the NE and NNE layers of the neural folds. Scale bars: 25 μm.



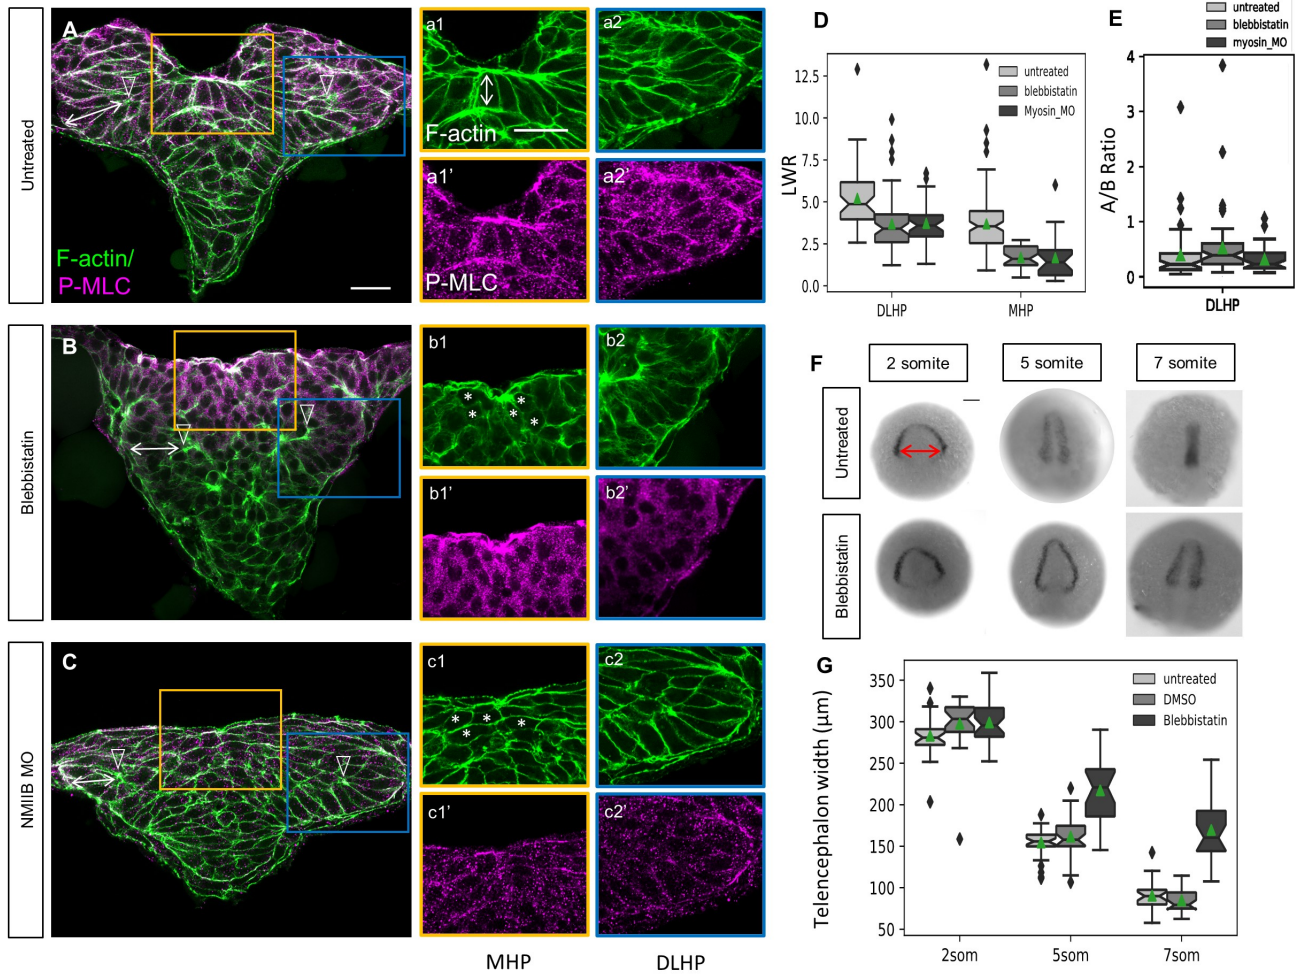

865  
866  
867  
868  
869  
870  
871  
872  
873  
874  
875  
876  
877  
878  
879  
880  
881  
882  
883  
884

885 n=23, mean=217.472. Two-sided Mann Whitney U test: 5 som - untreated vs DMSO: P=0.332; untreated  
886 vs blebbistatin-treated: P=1.30e<sup>-7</sup>; DMSO-treated vs blebbistatin-treated: P = 3.50e<sup>-6</sup>. 7 som: untreated:  
887 n=28, mean=90.444; DMSO-treated: n=27, mean 84.855; blebbistatin-treated: n=24, mean= 169.779. Two-  
888 sided Mann Whitney U test: 7 som - untreated vs DMSO: P=0.170; untreated vs blebbistatin-treated: P=2.06e<sup>-</sup>  
889 9; DMSO-treated vs blebbistatin-treated: P = 1.46e<sup>-9</sup>. Annotations: double white arrows = cell length in deep  
890 layer; open arrowhead = DLHP; asterisks = rounded neuroectodermal cells; red double arrow = posterior-most  
891 telencephalon width. Scale bars: 25 μm in A and a1; 100 μm in B.



892 **SUPPLEMENTARY MOVIE LEGENDS**

893 **Supplemental Movie 1. MHP cells sink inwards as neural folds elevate.** Time lapse  
894 imaging of embryo ubiquitously expressing m Kaede (green) that was photo-converted in  
895 medial superficial cells that form the MHP (magenta). Annotations: Cyan arrowhead: basal  
896 surface of neural fold cells; white arrows: sinking of MHP cells.

897  
898 **Supplemental Movie 2. 3-Dimensional rotation revealing organization of neural fold**  
899 **cells in a 5 som embryo.** Transverse section, at the level of the forebrain of a 5 somite  
900 embryo mosaically-expressing mGFP.

901  
902 **Supplemental Movie 3. 3-Dimensional rotation revealing organization of neural fold**  
903 **cells in a 7 som embryo.** Transverse section, at the level of the forebrain of a 7 somite  
904 embryo mosaically-expressing mGFP.

905  
906 **Supplemental Movie 4. Neural fold cells constrict basally as neural folds elevate.** Time  
907 lapse imaging of Tg[*emx3:YFP*] transgenic embryo ubiquitously expressing mRFP. YFP-  
908 positive neural fold cells (green) constrict basally as neural folds elevate. Annotations: Cyan  
909 arrow: basal surface of neural fold cells; white lines: telencephalon cells expressing YFP.

910  
911 **Supplemental Movie 5. MHP cells undergo oscillatory constriction with decreasing**  
912 **amplitude.** Time lapse imaging of embryo ubiquitously expressing mGFP. Clusters of medial  
913 (MHP) constrict apically in an oscillatory manner, in contrast to their lateral neighbors that do  
914 not. Annotations: cyan dots = MHP cells; yellow asterisks = MHP-adjacent cells that do not  
915 undergo apical constriction, yellow dashed line: midline, red asterisks = EVL cells.

916  
917 **Supplemental Movie 6. Neural tube closure is initiated at two closure points in the**  
918 **forebrain.** Time lapse imaging of embryo mosaically-expressing mGFP. The Green and  
919 brightfield channels are overlaid to reveal the shape of the neural folds and neural groove.  
920 Annotations: red asterisk: apex of the arch shaped neural folds; white dotted line: contour of  
921 the eye-shaped opening whose corners are defined by closure points 1 and 2, double headed  
922 arrow: width of the neural plate, which decreases over time, white arrows: closure points 1  
923 and 2, respectively.

924  
925 **Supplemental Movie 7. Neural fold cells extend filopodial protrusions across the**  
926 **midline.** Time lapse imaging of embryo ubiquitously expressing mGFP. Cells (cyan and  
927 magenta) originating from contralateral sides of the ANP extend medially oriented filopodia  
928 and transiently interdigitate across the midline (yellow dashed line).

929 **SUPPLEMENTAL FIGURE**

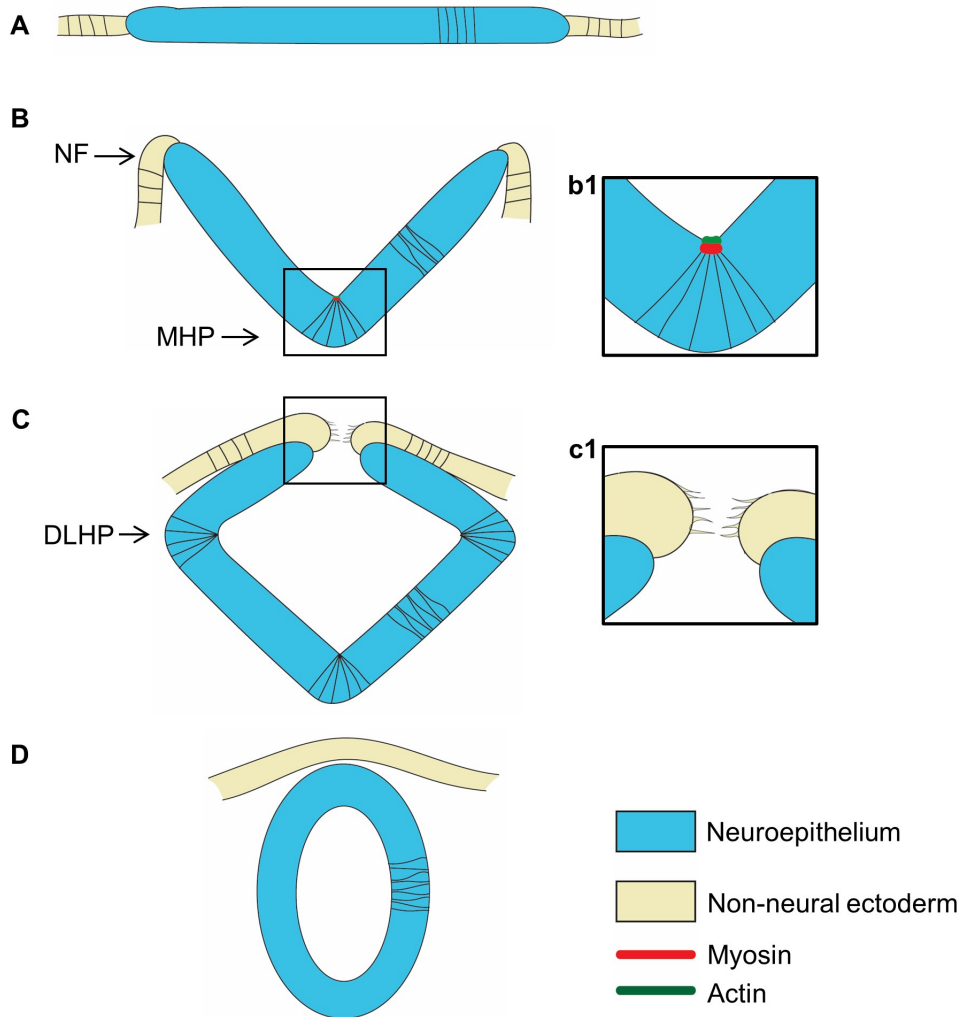

930  
931  
932  
933  
934  
935  
936  
937  
938  
939

**Supplemental Figure S1. Neurulation in amniotes. Cross sectional illustration of stages of neurulation in amniotes.** (A) The neural plate and adjacent non neural ectoderm. (B) Medial hinge point formation shapes the neural groove and elevates the neural folds. (b1) Illustration of medial hinge point cells that are apically constricted and enriched for actomyosin at their apex. (C) Dorso-lateral hinge point formation brings the neural folds in close apposition. (c1) Filopodial extensions establish contact between neural fold cells across the midline. In the mouse forebrain the first contact is established between neuroectodermal cells. (D) The neural folds fuse medially, separating the epidermis from the neural tube. Abbreviations: DLHP = dorso-lateral hinge point; MHP = medial hinge point; NF = neural fold.

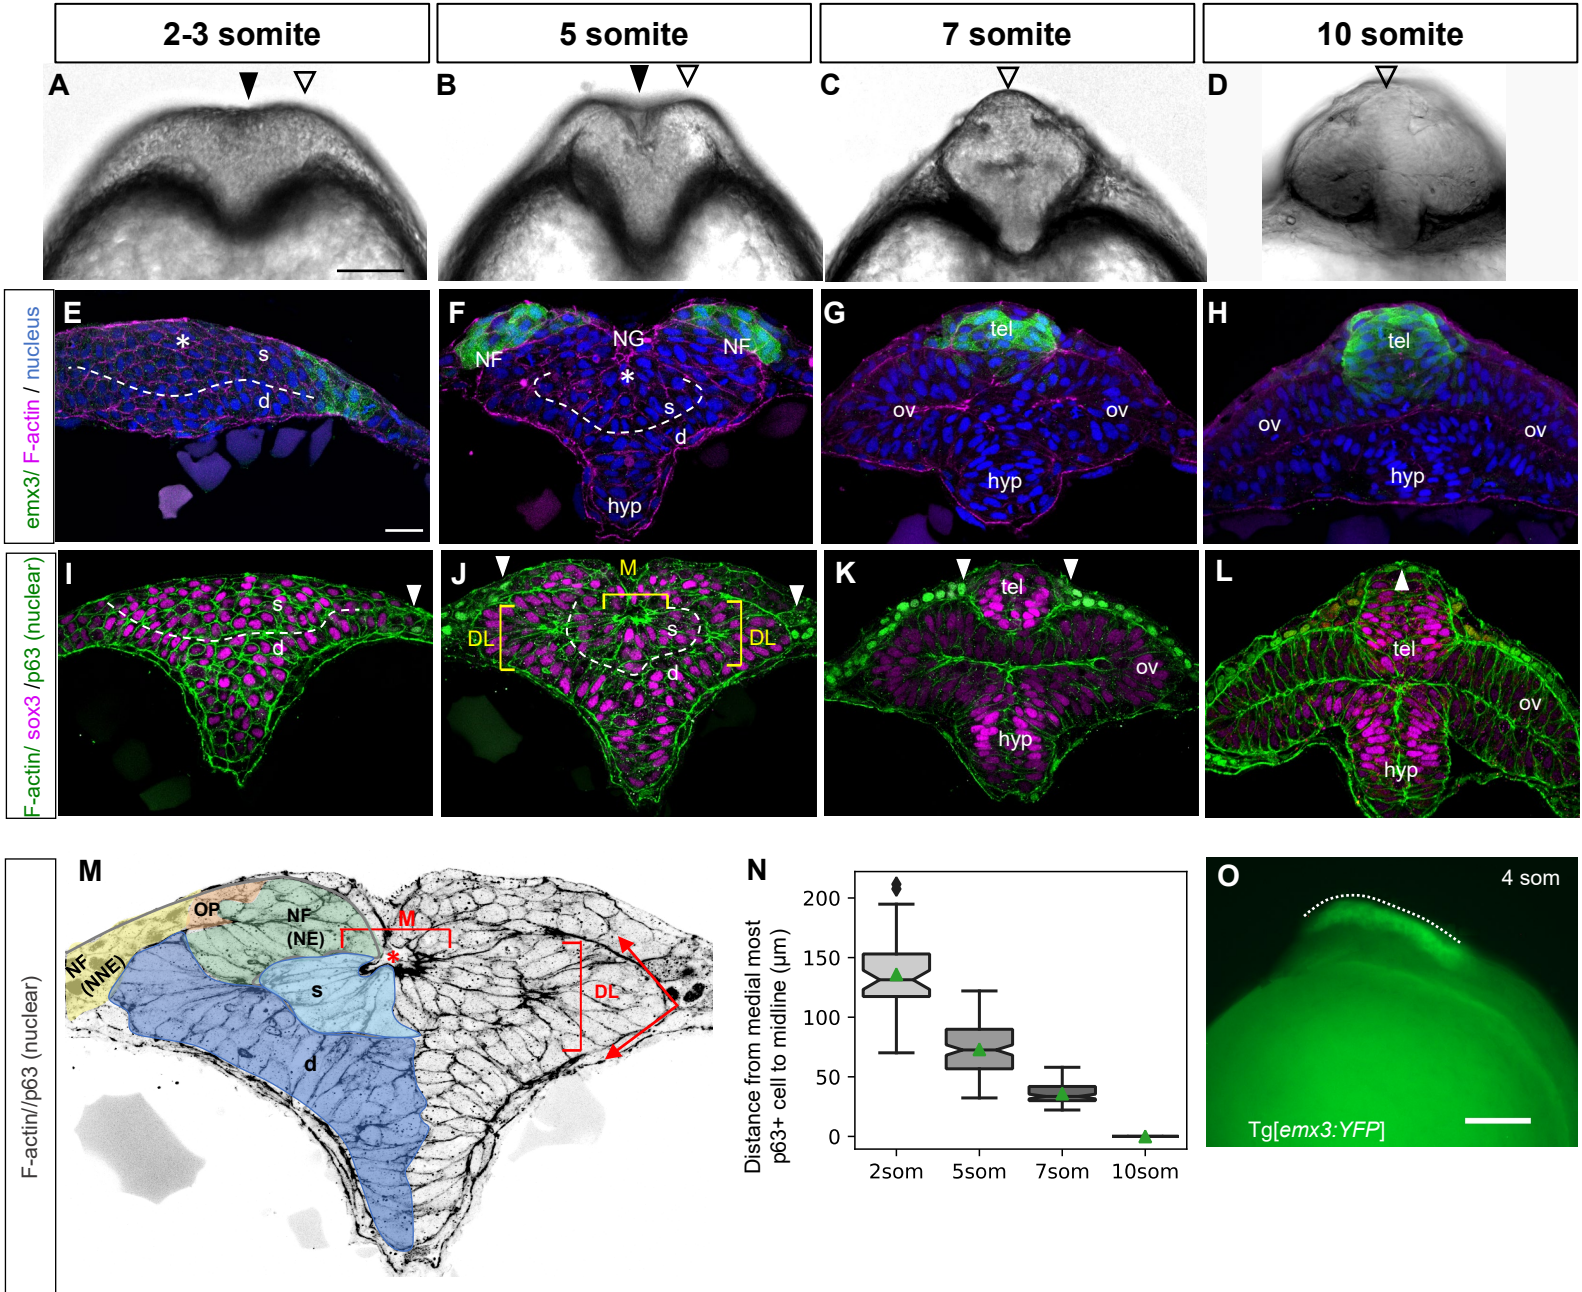



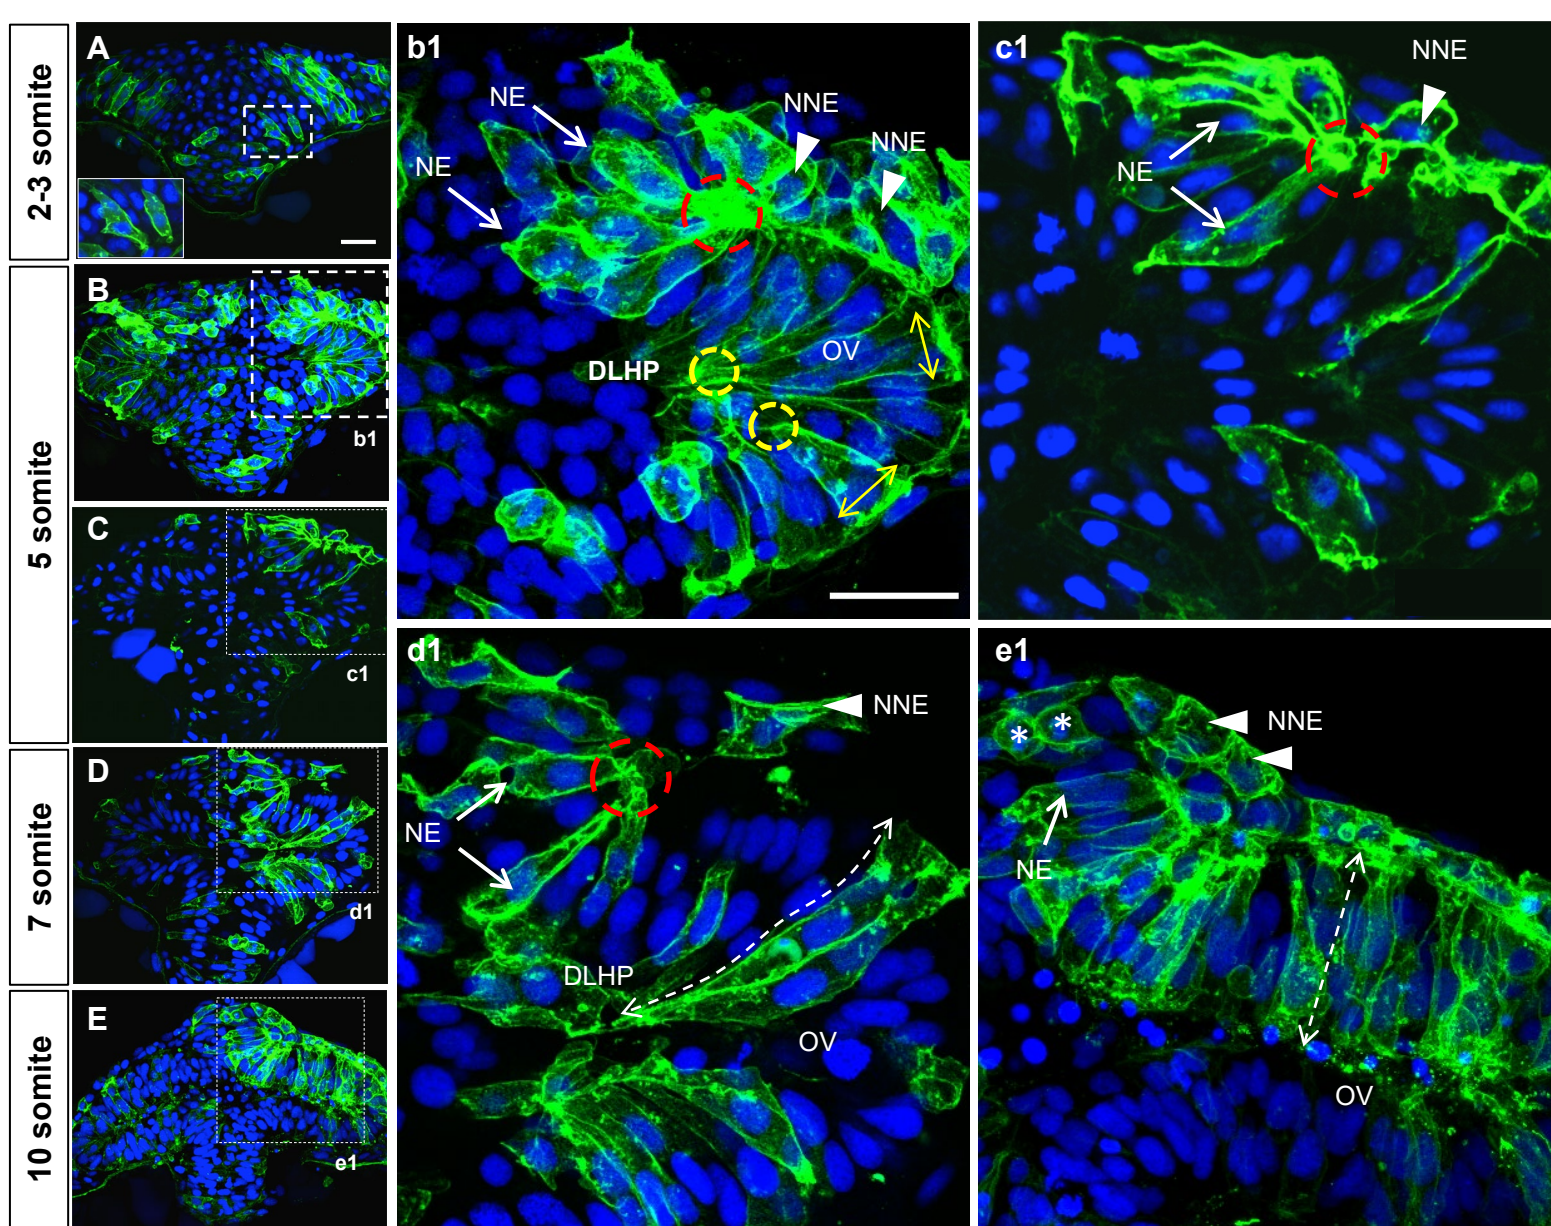

2 somites

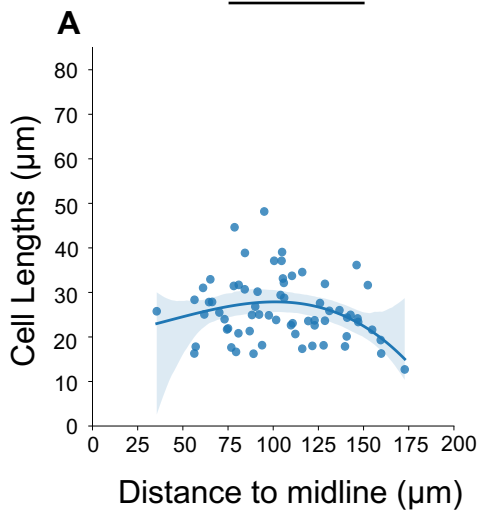

5 somites

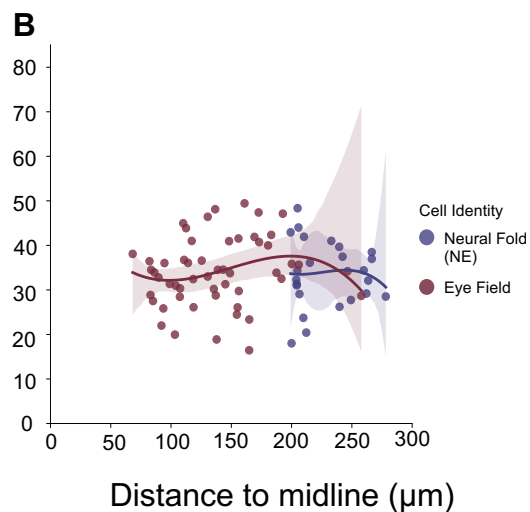

7 somites

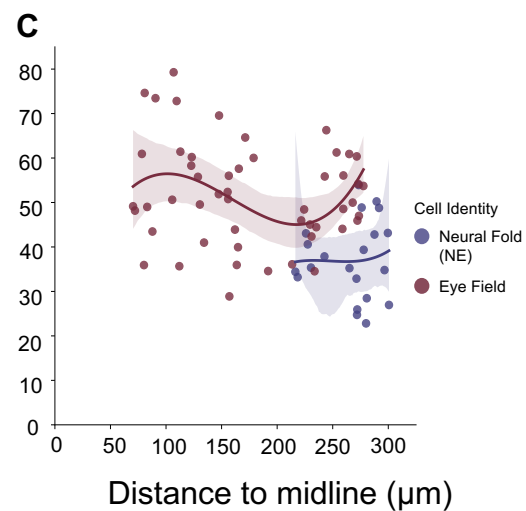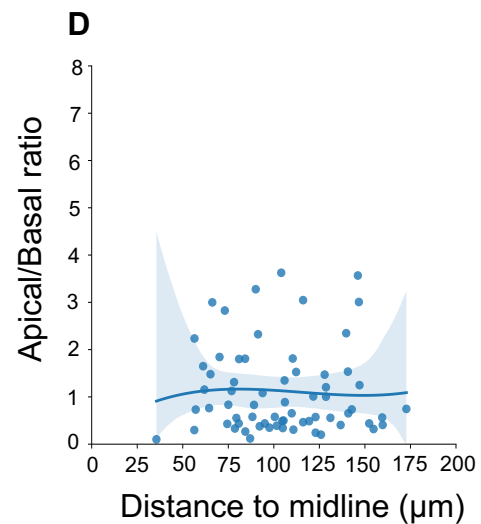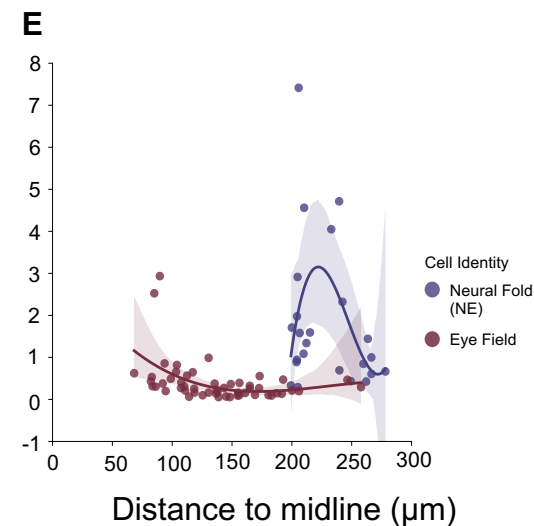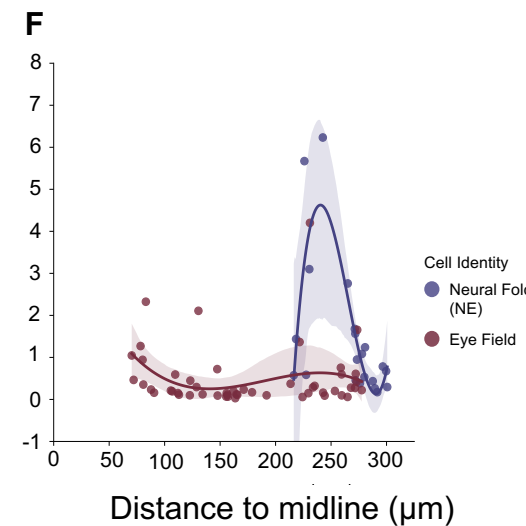

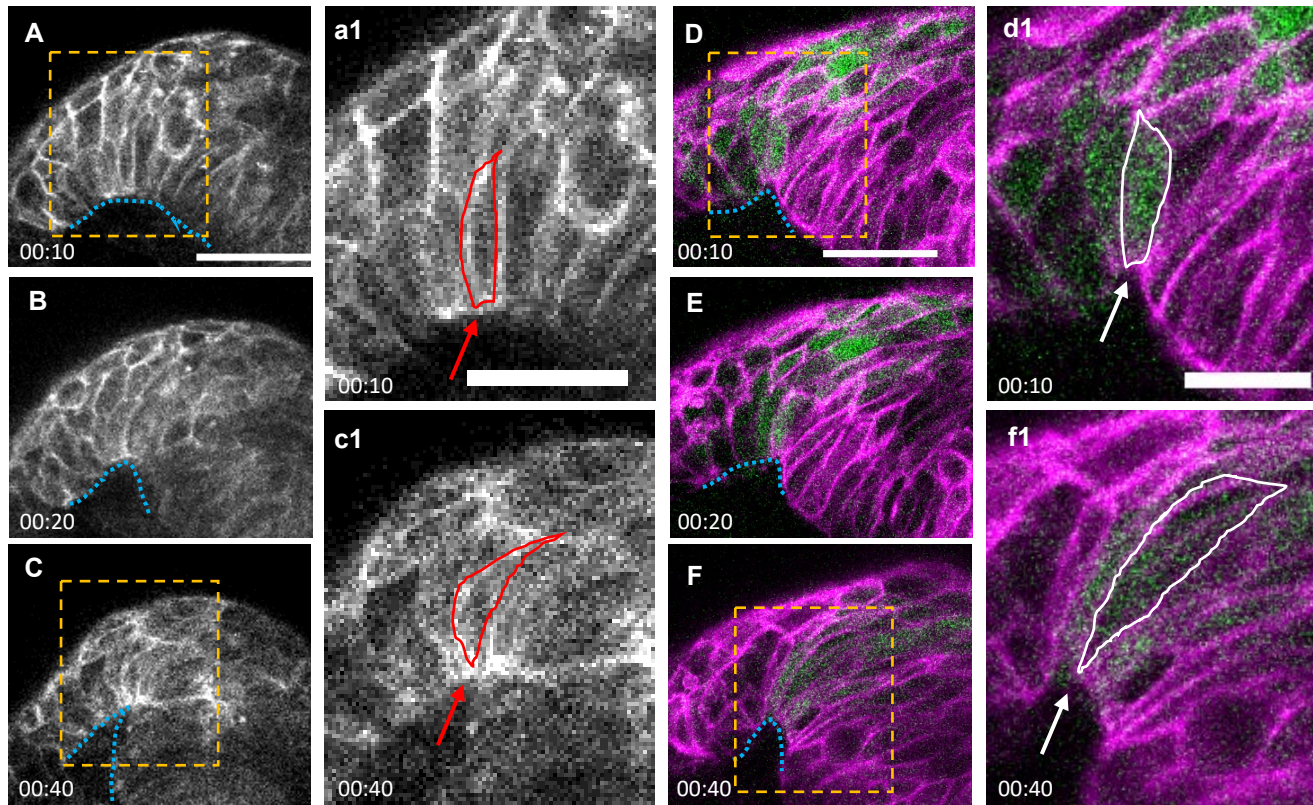



2 somites

5 somites

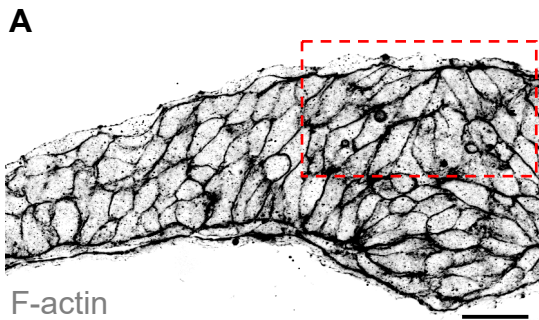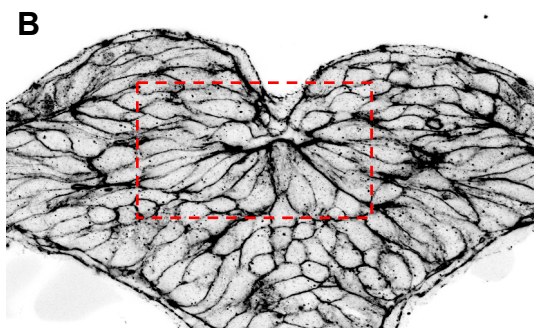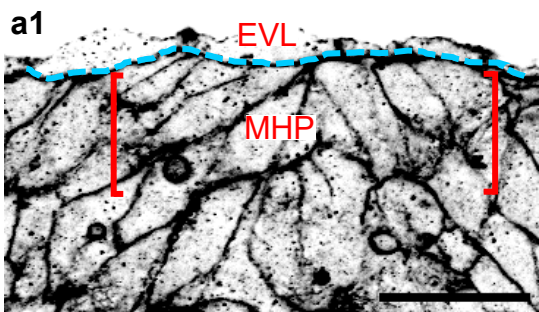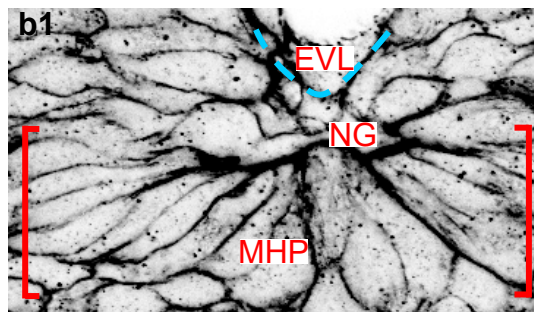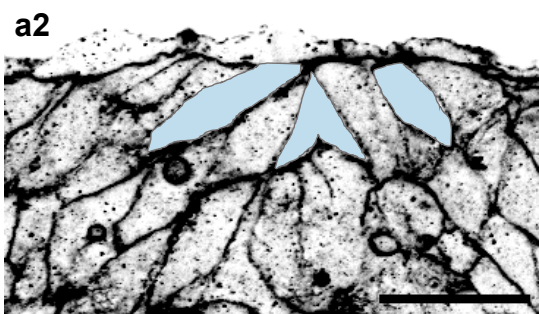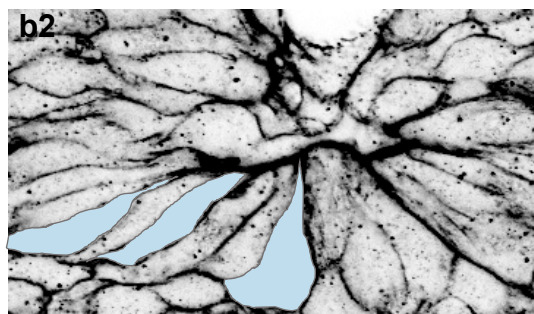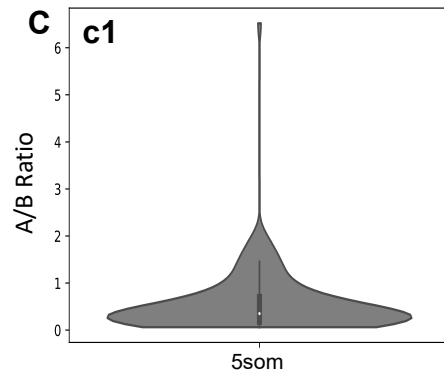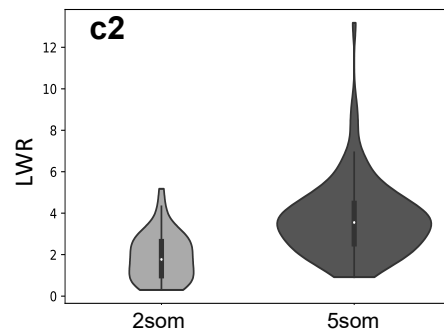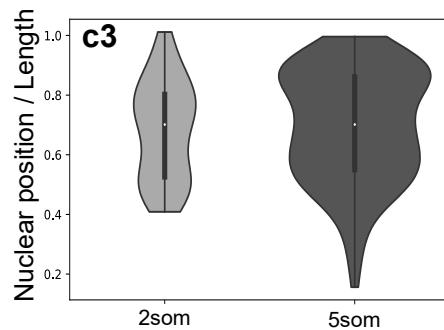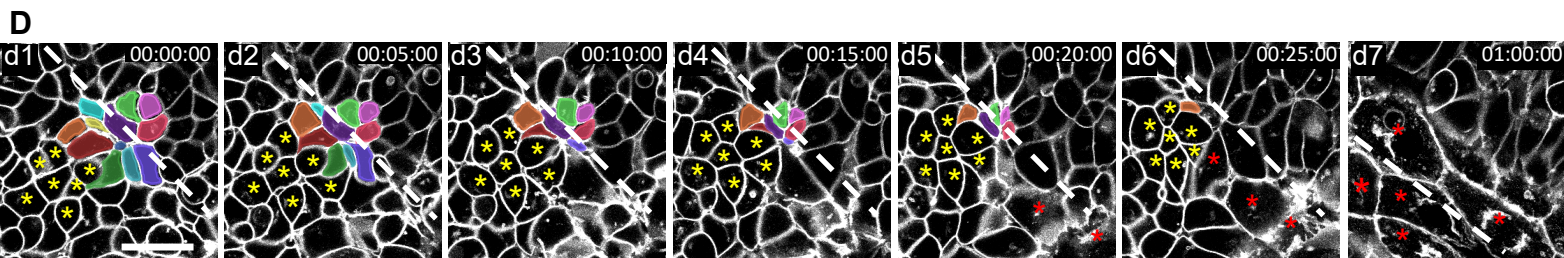

## MHP cells

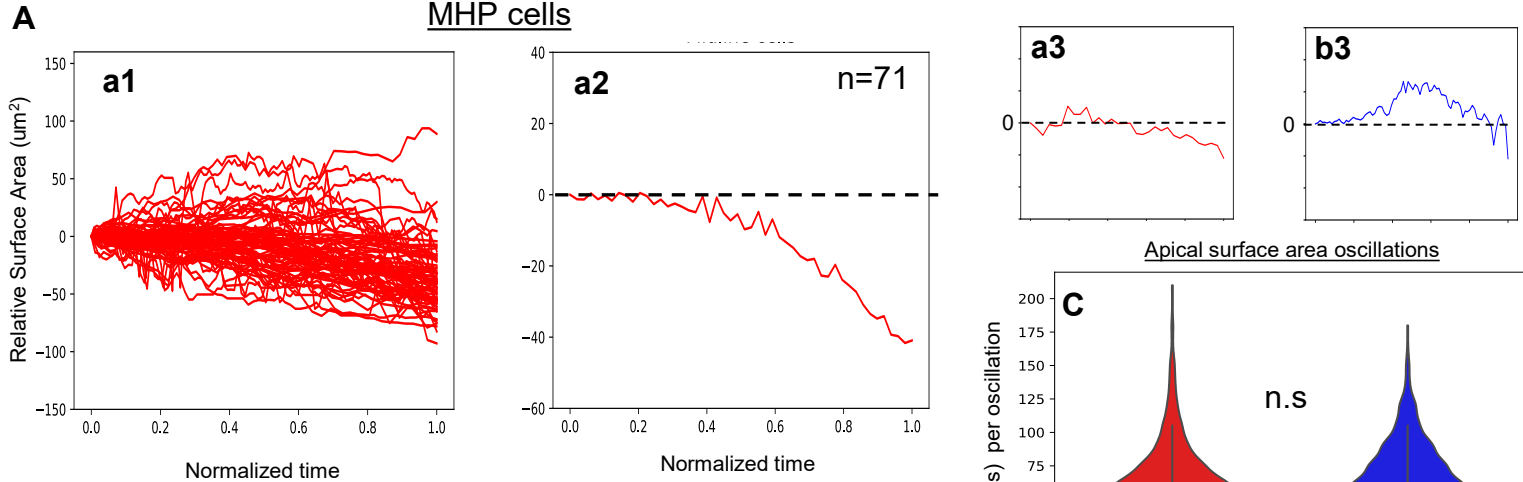

## MHP-adjacent

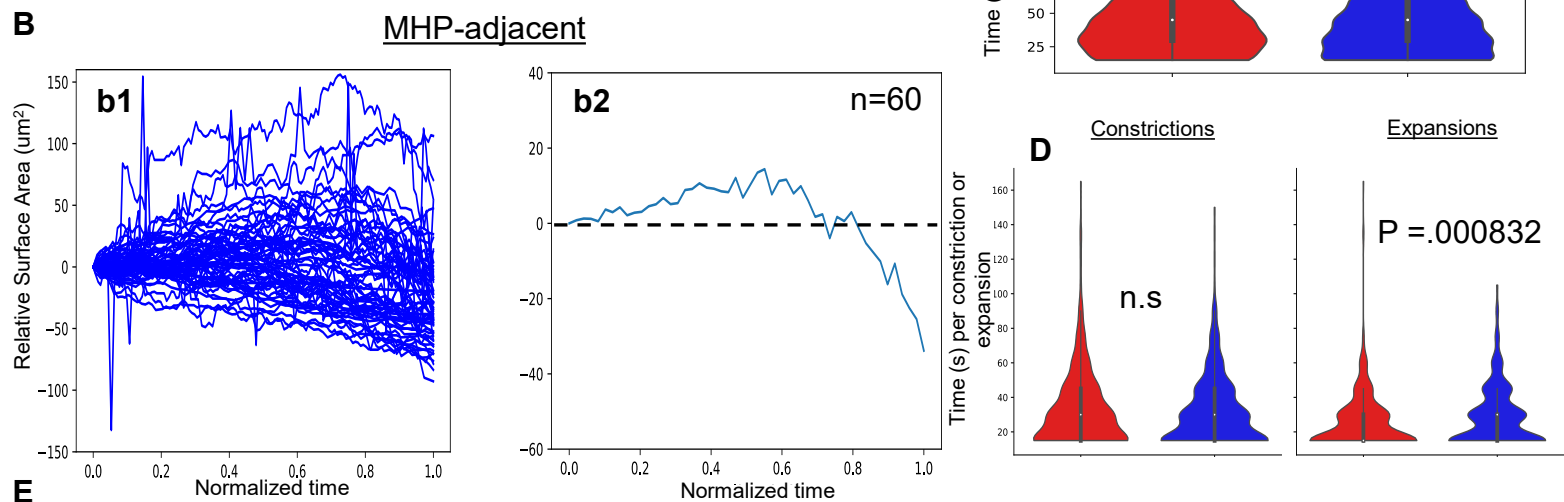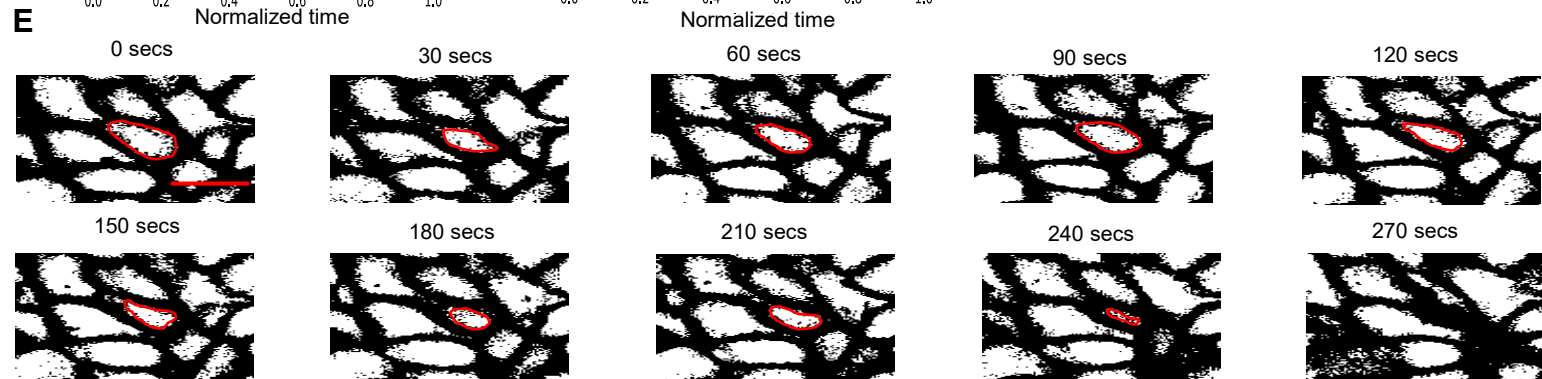



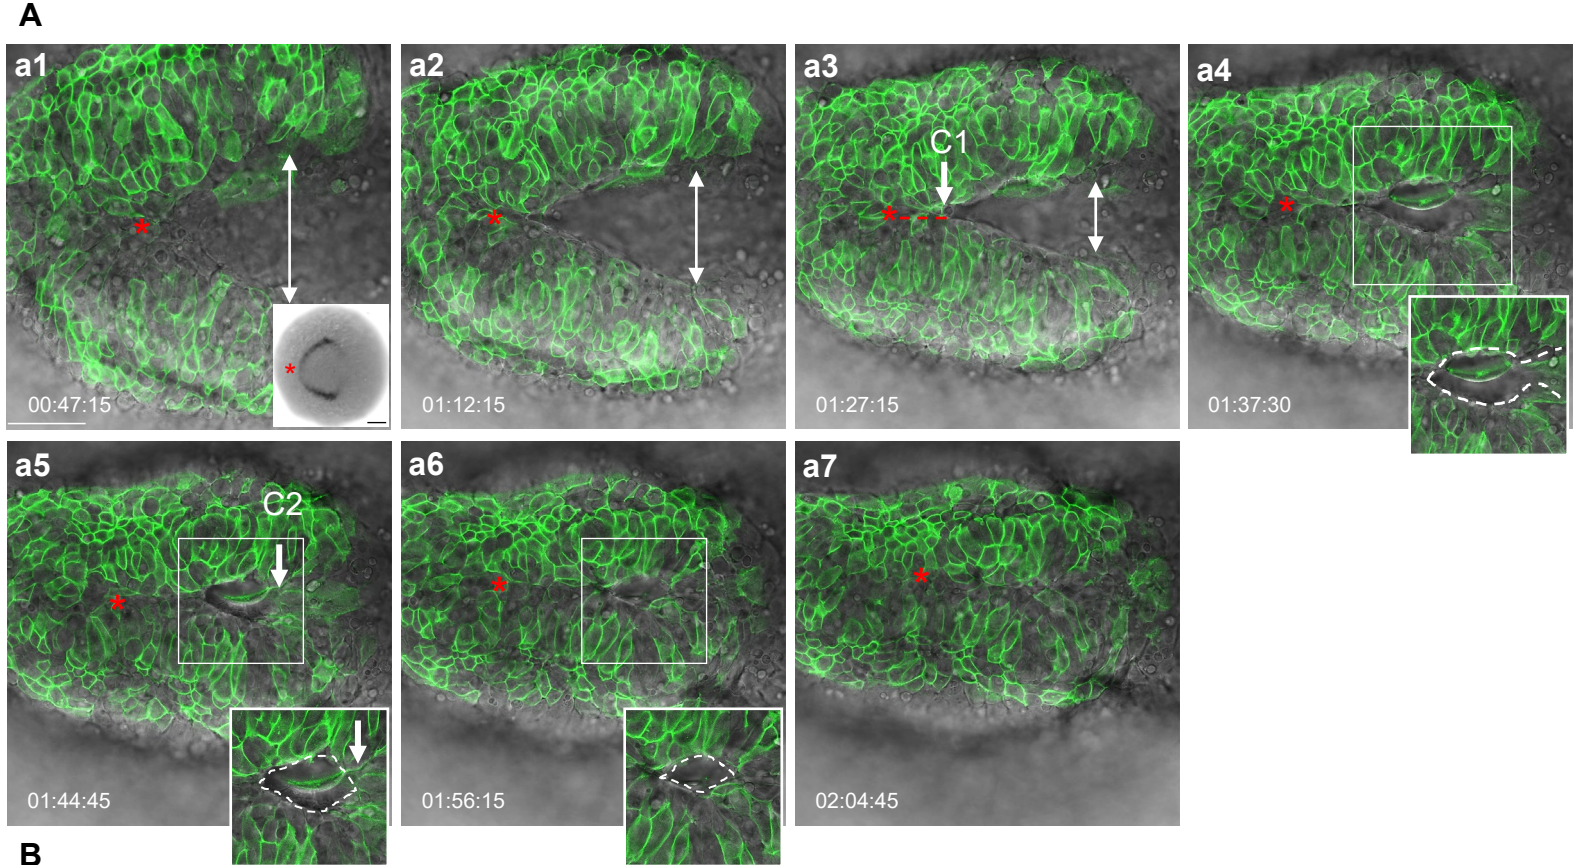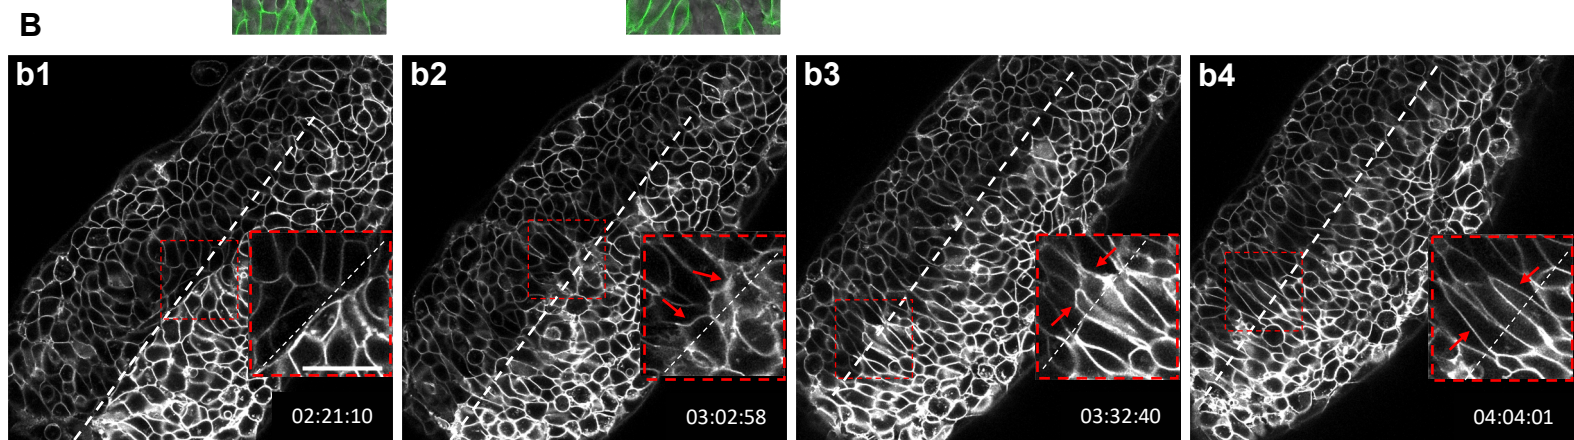

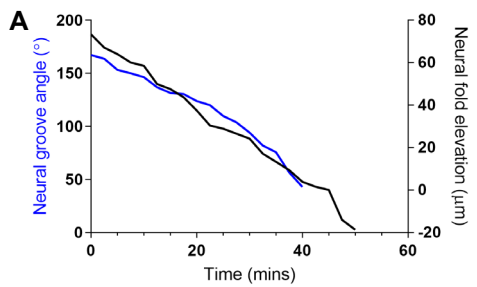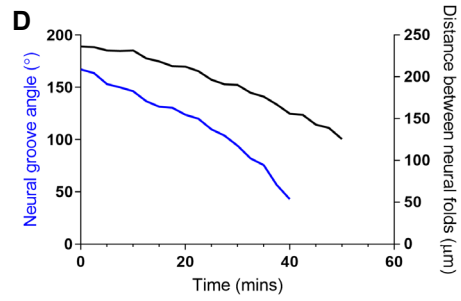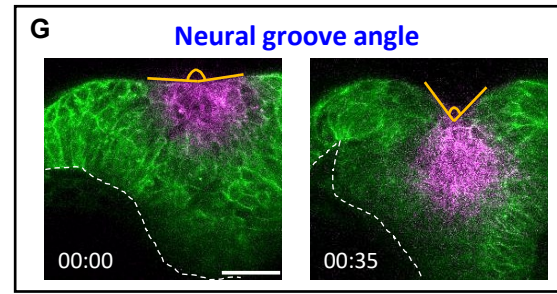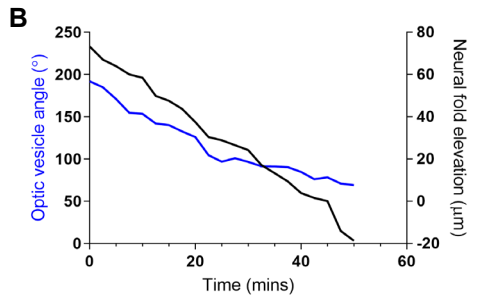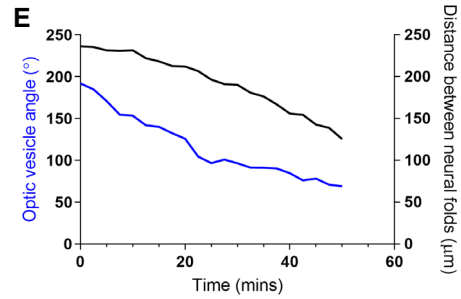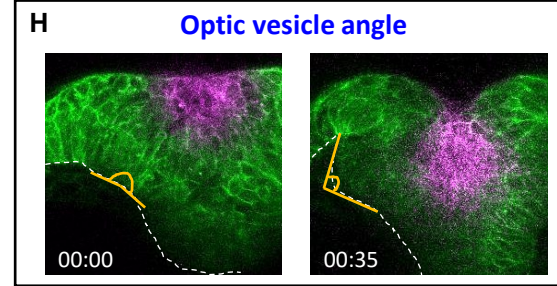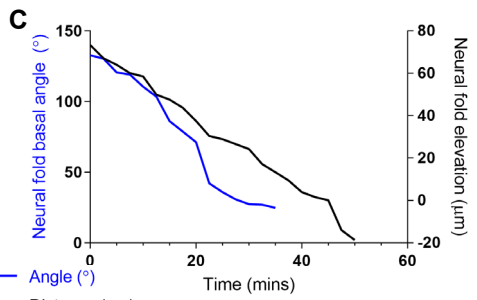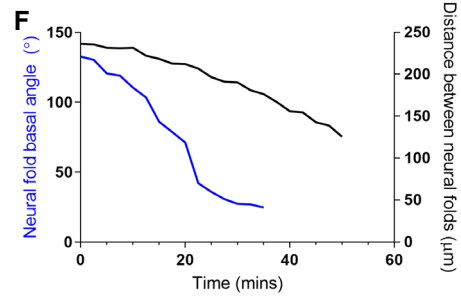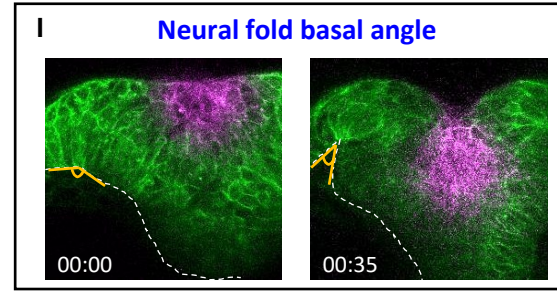

— Angle ( $^{\circ}$ )  
— Distance ( $\mu\text{m}$ )

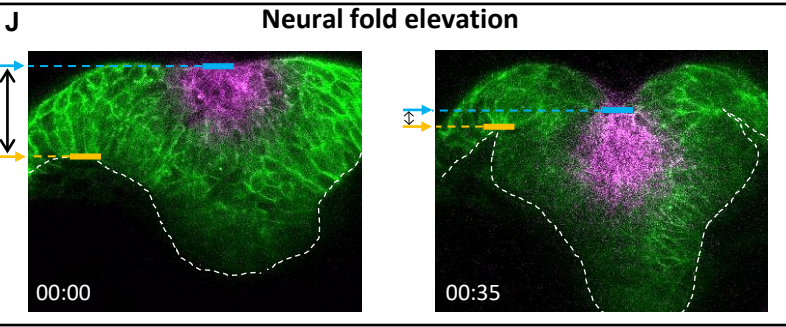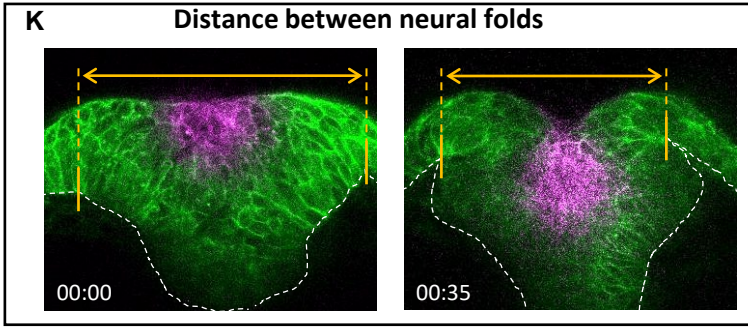



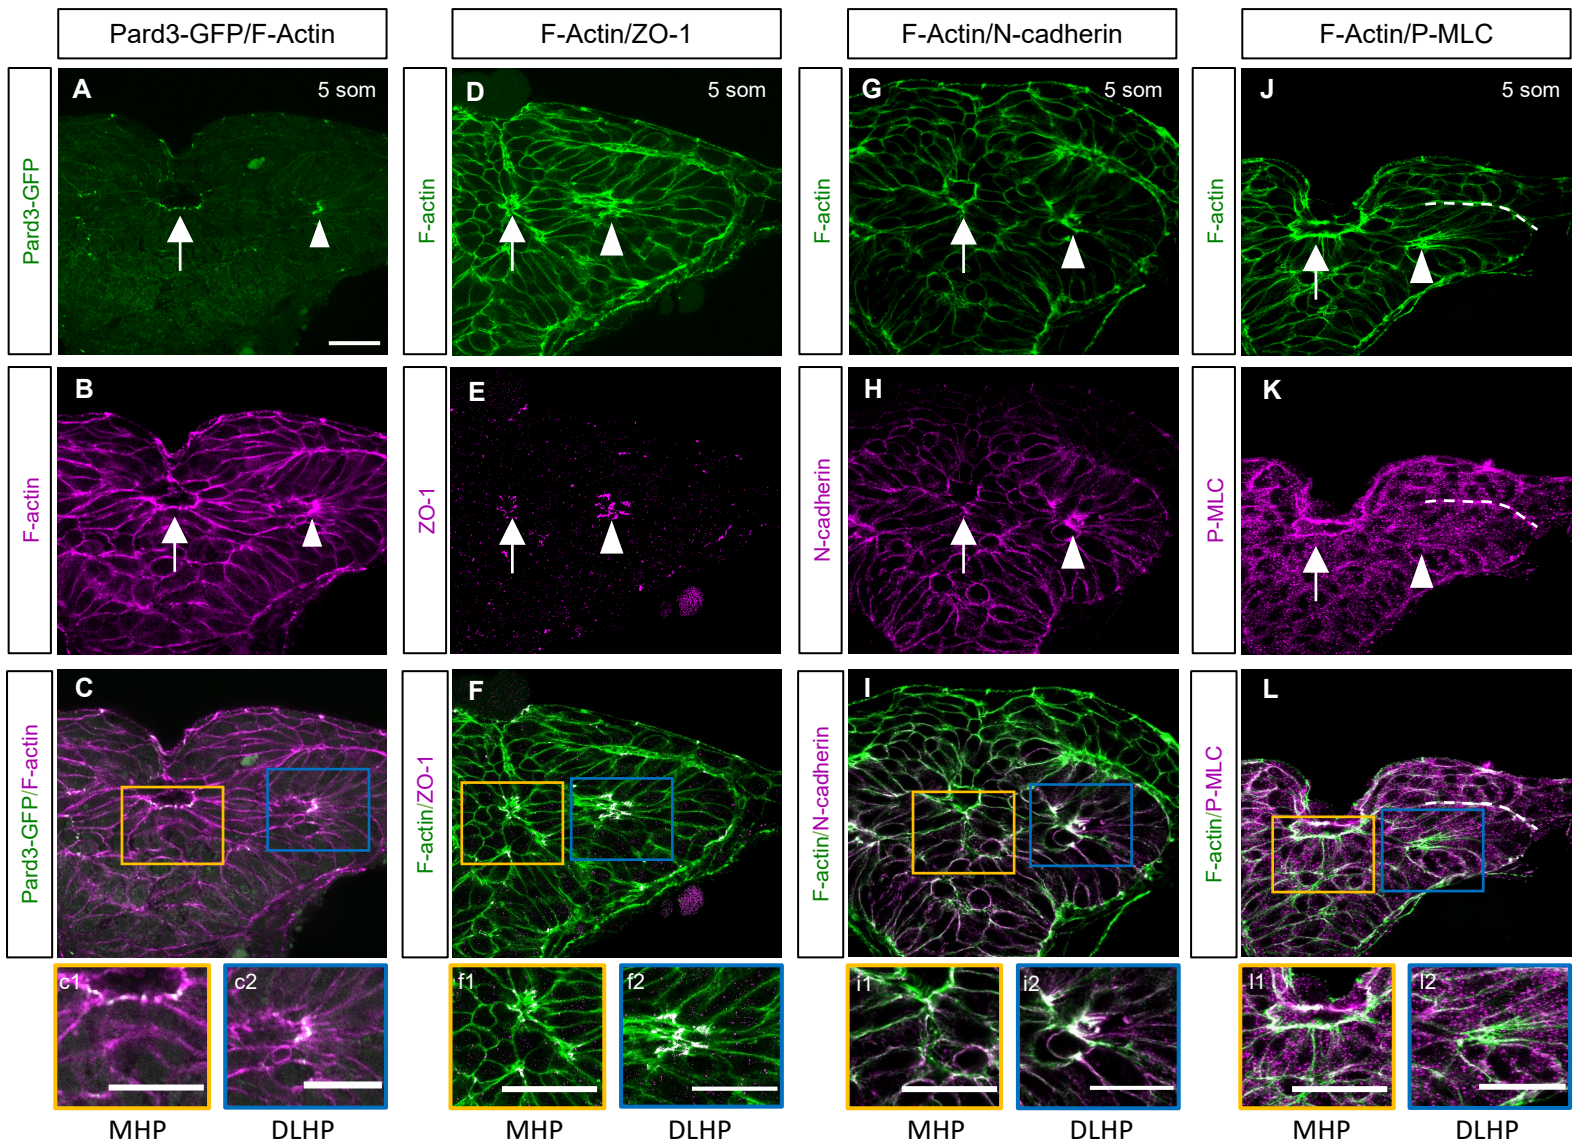

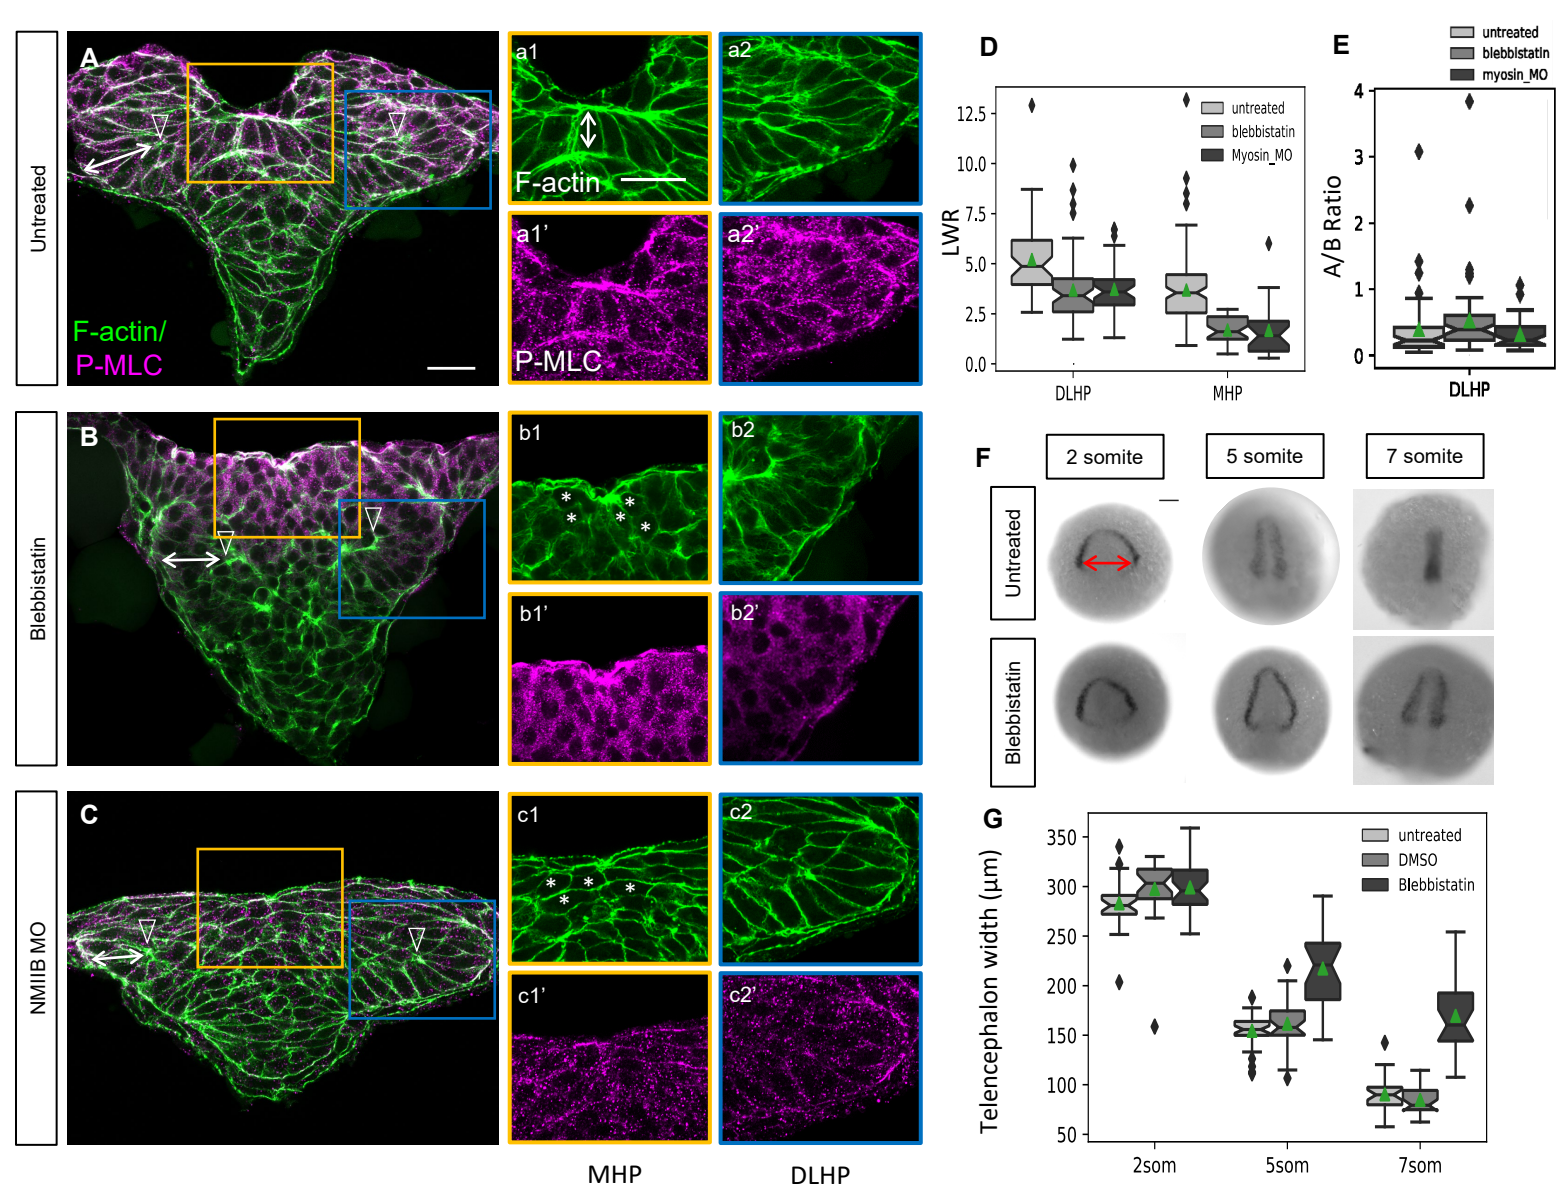

Source: https://www.biorxiv.org/content/10.1101/738161.full.pdf
