1  
2  
3  
4  
5  
6  
7  
8  
9  
10  
11

**Hingepoints and neural folds reveal conserved  
features of primary neurulation in the zebrafish forebrain**

Jonathan M. Werner<sup>1</sup>, Maraki Y. Negesse<sup>1</sup>, Dominique L. Brooks<sup>1</sup>, Allyson R. Caldwell<sup>1</sup>,  
Jafira M. Johnson<sup>1</sup> and Rachel Brewster<sup>1</sup>

1. Department of Biological Sciences, University of Maryland Baltimore County,  
Baltimore, MD 21250

12 **ABSTRACT**

13

14 Primary neurulation is the process by which the neural tube, the central nervous system  
15 precursor, is formed from the neural plate. Incomplete neural tube closure occurs frequently,  
16 yet underlying causes remain poorly understood. Developmental studies in amniotes and  
17 amphibians have identified hinge-point and neural fold formation as key morphogenetic events  
18 and hallmarks of primary neurulation, the disruption of which causes neural tube defects. In  
19 contrast, the mode of neurulation in teleosts like zebrafish has remained highly debated.  
20 Teleosts are thought to have evolved a unique pattern of neurulation, whereby the neural  
21 plate infolds in absence of hinge-points and neural folds, at least in the hindbrain/trunk where  
22 it has been studied. We report here on zebrafish forebrain morphogenesis where we identify  
23 these morphological landmarks. Our findings reveal a deeper level of conservation of  
24 neurulation than previously recognized and establish the zebrafish as a model to understand  
25 human neural tube development.

26

27

28

29

30

31

## 32 INTRODUCTION

33 Primary neurulation is the process by which the neural tube, the precursor of the brain and  
34 spinal cord, is shaped from an open single-cell layered epithelium, known as the neural plate.  
35 These morphogenetic events have mostly been studied in amniotes (mouse and chick) and  
36 amphibians (frogs), where conserved mechanisms were identified. Following neural  
37 induction, the neural plate (Figure 1A) narrows and elongates by convergent extension  
38 movements<sup>1,2</sup>. The morphology of the neural plate is further changed by bending in a  
39 biphasic manner, initiated at hinge points<sup>3</sup>. The first morphological event is the formation of  
40 the medial hinge point (MHP), which bends the flat neural plate into a V shape, forming the  
41 neural groove (Figure 1B). Neural folds at the edges of the neural plate are subsequently  
42 elevated by this neuroectoderm-intrinsic force and also by the expansion of the head  
43 mesoderm in the cranial region<sup>4</sup>. In the second phase, the neural plate bends and folds at  
44 paired dorso-lateral hinge points (DLHPs), which brings the neural folds closer together  
45 (Figure 1C). The neural folds eventually meet and fuse at the dorsal midline, completing  
46 neural tube formation. The dorsal midline is subsequently remodeled to separate the inner  
47 neuroectoderm from the outer non-neural ectoderm fated to become the epidermis (Figure  
48 1D). In the cranial region of amniotes, neural tube closure is initiated at several sites and  
49 extends via a zippering process either in a unidirectional or bidirectional manner from these  
50 closure points to seal the neural tube. Incomplete cranial neural tube closure occurs  
51 frequently, resulting in anencephaly and exencephaly<sup>3</sup>.

52 Several cellular mechanisms have been identified that contribute to the bending of the  
53 neural plate, among which apical constriction is the most studied<sup>5-8</sup>. A meshwork of F-actin  
54 accumulates at the apical cortex of neuroectodermal cells and contracts, thereby reducing

55 the cell apex during neural tube closure (Figure 1b1). The contraction is driven by the  
56 molecular motor myosin that co-localizes with F-actin at the apical cortex. Disruption of F-  
57 actin using drug inhibitors or in mice deficient for regulators of the cytoskeleton such as  
58 Shroom3, the actin-binding protein vinculin or a RhoA-specific GEF (GEF-H1) causes severe  
59 cranial neural tube defects<sup>5,9-14</sup>. Similarly, treatment with blebbistatin, an inhibitor of non-  
60 muscle myosin II activity, impairs apical constriction of hinge point cells in the superficial layer  
61 of the *Xenopus* neural plate<sup>15</sup>.

62 In contrast to hinge point formation, the cell intrinsic mechanisms that shape neural fold  
63 cells are less understood. The neural folds are bilaminar, consisting of a layer of  
64 neuroectoderm capped by a layer of non-neural ectoderm<sup>16</sup>. Neural fold fusion involves the  
65 formation of cellular protrusions (filopodia and lamellipodia) that span the midline gap and  
66 establish the first contact and attachment points with neural fold cells from the contralateral  
67 side<sup>17-19</sup> (Figure 1c1). There is little consensus on the cell type, neuroectoderm or non-neural  
68 ectoderm, that generates the cellular protrusions as it varies depending on the species and  
69 the axial level. In the mouse forebrain, the initial contact is made by neuroectodermal cells  
70<sup>17,20-23</sup>. Treatment with Cytochalasin D, an inhibitor of actin polymerization or genetic ablation  
71 of the cytoskeletal regulators Rac1 or Cdc42 blocks the formation of protrusions and prevents  
72 neural fold fusion<sup>19</sup>, revealing the central role of these cellular processes.

73 Though more anterior regions of the neural tube undergo primary neurulation as  
74 described above, most vertebrates also exhibit a distinct type of neural tube formation in  
75 more posterior regions, termed secondary neurulation. During this process, a mesenchymal  
76 cell population condenses into a solid neural rod that subsequently epithelializes and forms a  
77 central lumen<sup>24,25</sup>. The mechanisms of neural tube formation in zebrafish have been the

78 source of considerable debate, and it has been proposed that they are unique among  
79 vertebrates<sup>26 27</sup>. In zebrafish, the neural tube in the hindbrain and trunk region initially forms  
80 a solid rod (the neural keel) that later develops a lumen, a process seemingly analogous to  
81 secondary neurulation<sup>28</sup>. However, examination of the tissue architecture in zebrafish<sup>29-31</sup>  
82 and other teleosts<sup>32,33</sup> revealed that the neural rod is shaped by infolding of a neural plate  
83 (albeit incompletely epithelialized), which best fits the description of primary neurulation<sup>26</sup>.  
84 Despite this evidence, differences in tissue architecture, the mesenchymal-like character of  
85 the neural plate and the apparent lack of hinge points, neural groove and neural folds are  
86 difficult to reconcile with a mode of primary neurulation and have contributed to the persistent  
87 view that neural tube formation in teleosts is different than in other vertebrates<sup>34-36</sup>.

88 We show here that, in contrast to the zebrafish hindbrain and trunk region, the process  
89 of neural tube formation in the forebrain of this teleost exhibits the hallmarks of primary  
90 neurulation observed in other vertebrates. We observe the presence of hinge points and  
91 neural folds in the epithelialized anterior neural plate (ANP), demonstrate that formation of  
92 the MHP involves oscillatory apical contractions that progressively reduce the apical surface,  
93 and show that disruption of myosin function impairs apical constriction of these cells and  
94 neural fold convergence. We further show that neural tube closure is initiated at two separate  
95 sites in the forebrain and that fusion of the neural folds is mediated by filopodial-like  
96 extensions of neuroectodermal cells that bridge the midline. These findings identify  
97 conserved mechanisms of primary neurulation that were previously overlooked in teleosts  
98 and support the suitability of zebrafish for understanding the etiology of human neural tube  
99 defects.

## 100 **RESULTS**

### 101 **Epithelial character of the anterior neural plate is associated with bending and folding** 102 **movements**

103 The zebrafish ANP is quite distinct from the neural plate in more posterior regions, as it  
104 undergoes precocious epithelialization<sup>37</sup>. To assess whether the epithelialized nature of the  
105 ANP also correlates with a change in the mode of neurulation, we examined the morphology  
106 of the neuroectoderm in optical cross sections at developmental stages ranging from 2 to 7  
107 somites (som). We observed that at 2-5 som the ANP has a V shape marked by a medial  
108 neural groove (black arrowhead) flanked by the elevated lateral edges of the ANP (white  
109 arrowhead), which are reminiscent of neural folds (Figure 2A-C). By 6 som the groove is no  
110 longer visible and the elevated edges of the ANP have fused medially (Figure 2E, white  
111 arrowhead) and form a dorsal bulge by 7 som (Figure 2F, white arrowhead). These  
112 observations suggest that the ANP bends and folds around hinge points to facilitate the  
113 medial convergence and fusion of neural folds at the dorsal midline.

114

### 115 **The anterior neural plate is multi-layered and gives rise to the eyes and forebrain**

116 The central part of the ANP is fated to become the eyes, while its lateral edges produce the  
117 dorsally-located telencephalon and the ventral-most ANP region gives rise to the  
118 hypothalamus/ventral diencephalon<sup>37,38</sup>. To gain a better understanding of the  
119 morphogenetic events that shape the zebrafish ANP, we examined transverse views of  
120 transgenic Tg[*emx3:YFP*] embryos at developmental stages 2, 5, 7 and 10 som, in which  
121 telencephalon precursors are labeled with the yellow fluorescent protein (YFP)<sup>39</sup>. We  
122 observed, as previously described<sup>37</sup>, that the ANP is a multi-layered tissue, with a

123 mesenchymal superficial core and a marginal or deep layer. These layers will henceforth be  
124 referred to as the superficial and deep layers, respectively (s and d in Figure 3A,B). The YFP-  
125 positive lateral edges of the ANP elevate, migrate over the eye field and fuse medially at 7  
126 som to form the telencephalon (Figure 3C-D)<sup>37,38</sup>. By 7 som the multilayered ANP (Figure  
127 3A, B) resolves into a single-cell layered neuroectoderm and Ivanovitch et al. (2013)<sup>37</sup> have  
128 shown that this process involves radial intercalation of superficial cells between deep  
129 marginal cells, which also contributes to the expansion of the optic vesicles (Figure 3F, G).  
130 While the morphological changes and cellular dynamics that form the eyes are quite well  
131 understood<sup>37,38</sup>, the accompanying events that shape the forebrain are for the most part  
132 unknown and the focus of the current study.

133

### 134 **Structures analogous to hinge points and neural folds are present in the anterior neural** 135 **plate**

136 To investigate whether the ANP bends and folds around hinge points to bring neural folds in  
137 close apposition, we examined the cytoarchitecture of this tissue in embryos at stages 2-10  
138 som, labeled with phalloidin (filamentous (F) actin), anti-Sox3 (neural cells) and anti-p63  
139 (epidermal cells, nuclear label) (Figure 3E-H).

140 We found that at 2 som, neural cells appear mesenchymal with no visible polarized  
141 enrichment of F-actin (Figure 3E), consistent with previous observations<sup>37</sup>. The epidermis at  
142 this stage is in a far lateral position (white arrowhead in Figure 3E).

143 Between 2 and 5 som, cells undergo rapid epithelialization, as evidenced by foci of F-  
144 actin enrichment in the medial/superficial region (M in Figure 3F, I) and in two dorso-lateral  
145 clusters in the deep marginal layer (DL in Figure 3F, I). The apical surfaces of the

146 epithelialized superficial cells appear to constrict and orient towards the midline, resulting in  
147 the formation of a medial neural groove (asterisk in Figure 3I). Similarly, the paired dorso-  
148 lateral clusters of epithelialized cells in the deep layer are also apically constricted and the  
149 neuroectoderm bends and folds sharply at this level (red arrows in Figure 3I), elevating the  
150 lateral edges of the ANP above the superficial layer and bringing them closer to the midline.  
151 These data suggest that the medial and dorso-lateral cells enriched for apical F-actin may  
152 function as hinge points. Similarly to amphibians whose neural plate is bilayered<sup>40</sup>, the  
153 putative medial hinge point in the zebrafish ANP forms in the superficial layer and is therefore  
154 more dorsally positioned than its chick and mouse counterpart. However, the zebrafish dorso-  
155 lateral hinge points form in the deep layer.

156 The lateral edges of the ANP are bilaminar at 5 som, consisting of a layer of  
157 neuroectoderm cells capped by a layer of p63-positive non-neural ectoderm (and Sox3/p63-  
158 negative olfactory placodal cells bridging the two layers), indicative of a neural fold structure  
159 (Figure 3F, I). The YFP-positive ANP cells in Tg[emx3:YFP] embryos correspond to the  
160 neuroectoderm component of neural fold (Figure 3B), revealing that the tip of the neural fold  
161 gives rise to the telencephalon. At 4 som, the YFP-positive region of Tg[emx3:YFP] embryos  
162 extends the length of the forebrain (Figure 2C), delineating the anterior-posterior range of the  
163 neural folds.

164 The neural fold and putative hinge points are transient as they are no longer observed  
165 in 7 som embryos. By this stage, the tips of the neural folds have converged medially and  
166 fused, forming the telencephalon (Figure 3G). These cells are enriched for apical F-actin at  
167 10 som, indicating that they epithelialize (Figure 3D). The non-neural ectoderm still occupies  
168 a lateral position at 7 som (Figure 3C, arrowheads), however by 10 som these cells migrate



169 and fuse dorsally (single arrowhead in Figure 3D), indicating that, as observed in mice, the  
170 neuroectodermal component of the neural folds meet first (Figure 1)<sup>20,21</sup>. Measurements of  
171 the distance between the medial-most p63-positive domain and the dorsal midline at stages  
172 2-7 som indicate that the non-neural ectoderm portion of the neural folds converges steadily  
173 towards the midline and may provide a lateral force that contributes to the displacement of  
174 neural folds (Figure 3J).

175 These observations reveal that transient medial and dorso-lateral epithelialized cell  
176 clusters may be the functional equivalents of the MHP and paired DLHPs of amniotes (and  
177 will be referred to henceforth as such), as they form at the right time and place to contribute  
178 to the formation of the neural groove (MHP), bending of the neuroectoderm and medial  
179 convergence of the neural folds (DLHPs).

180

### 181 **Cell shape changes underlying DLHP and neural fold formation**

182 To capture the dynamics of neural fold formation and image neuroectodermal cells at higher  
183 resolution, we mosaically expressed membrane-targeted GFP (mGFP) and imaged embryos  
184 at the 2-10 som stages in transverse sections (Figure 4). 3D reconstructions of some of these  
185 images were generated to gain a better understanding of the spatial relation between labeled  
186 cells and image cellular protrusions in multiple planes (Supplemental Figures 1, 2).

187 At 2 som, cells in the deep layer have a columnar shape with one end in contact with  
188 the basal lamina and a future apical surface oriented towards the midline (Figure 4A). These  
189 cells extend membrane protrusions into the superficial layer, which may promote radial  
190 intercalation (inset in Figure 4A).

191           At 5 som, cells in the dorso-lateral deep layer have undergone apical constriction and  
192 basal expansion, forming DLHPs (yellow dotted circles and double arrowheads in Figure  
193 4B,b1; Supplemental Figure 1). These cell shape changes may initiate the outpocketing of  
194 the optic vesicles (ov in Figure 4B,b1). The bilaminar organization of the neural folds is  
195 clearly visible at this stage. Neuroectoderm cells within the neural folds (arrows in Figure 3b1  
196 and c1) are elongated and their basal poles are constricted, which gives them the  
197 appearance of fanning out from a focal point (red circles in Figure 4b1 and c1) that spatially  
198 coincides with a sharp bend in the neuroectoderm. The plasma membrane at the future  
199 apical surface of these cells is ruffled, indicative of dynamic protrusive activity (Supplemental  
200 Figure 2).

201           By 7 som (Figure 4D, Supplemental Figure 2), neuroectoderm cells of the neural folds  
202 have elongated and reached the dorsal midline. They maintain their earlier organization with  
203 basal poles constricted and clustered at a focal point on the basement membrane (red circle  
204 in Figure 4d1). 3D reconstructions reveal that these cells are finger-shaped as they extend  
205 across the dorsal midline. DLHP cells maintain their apical constriction/basal expansion and  
206 further elongate, contributing to the expansion of the optic vesicles (dotted double arrowhead  
207 in Figure 4d1).

208           At 10 som (Figure 4E, e1) deep cells in the eye field and neural folds have a columnar,  
209 epithelial organization. Consistent with previous findings, eye field cells shorten along their  
210 apico-basal axis by contracting their apical processes and coincidentally transition to a more  
211 dorso-ventral orientation <sup>37</sup> (dotted double arrow in Figure 4e1). Cuboidal non-neural  
212 ectoderm cells cover the dorsal surface of the newly formed telencephalon (arrowheads in  
213 Figure 4e1).

214 The dynamic cell shape changes in the deep layer of the neuroectoderm were  
215 quantified by measuring cell length and the apico:basal ratio of mGFP-labeled cells located at  
216 different positions along the medio-lateral axis of the ANP at 2, 5 and 7 som (Figure 5).  
217 These data reveal that the average length of DLHP cells increases while their apical:basal  
218 ratio decreases between 2 and 7 som, coincident with optic vesicle evagination. They also  
219 confirm that neuroectoderm cells of the neural folds elongate and adopt the reverse  
220 configuration, with basally constricted poles.

221 These findings indicate that zebrafish DLHP cells adopt a wedge shape similar to the  
222 cytoarchitecture of DLHPs in amphibians and amniotes, which enables epithelial bending.  
223 They further identify basal constriction of neuroectodermal cells in the neural folds as a cell  
224 shape change that contributes to neural fold formation.

225

### 226 **MHP cells constrict apically and elongate**

227 While mosaic expression of mGFP enabled high resolution imaging of DLHPs and neural  
228 folds, it resulted in few cells labeled in the medial superficial layer, where the MHP forms.  
229 Phalloidin labeling was therefore used to image these cells in 2 and 5 som embryos.

230 At the 2 som stage, some but not all medial/superficial cells immediately below the  
231 enveloping layer (EVL) are apically constricted, forming the MHP (Figure 6A-a2). By 5 som,  
232 MHP cells appear more densely packed, the majority of them are apically constricted and  
233 oriented towards the midline. Concomitant with these cell shape changes and the medial  
234 convergence of neural folds, MHP cells shift to a more ventral position (Figure 6B-b2. A small  
235 opening, the neural groove, is observed immediately above the MHP at this stage (NG in  
236 Figure 6b1).

237           Measurements of the apico:basal surface ratio of MHP cells in 5 som embryos  
238 confirmed that they are wedge-shaped (Figure 6c1). Similar to amphibians<sup>41</sup>, apical  
239 constriction appears tightly coupled to cell elongation, as the length-to-width ratio (LWR) of  
240 MHP cells increases significantly between 2 and 5 som (Figure 6c2). Thus, both apical  
241 constriction and cell elongation appear to shape the MHP and contribute to tissue-level  
242 morphogenesis.

243           Another contributing factor to hinge point formation in amniotes is the basal location of  
244 nuclei in both the medial and lateral hinge points<sup>42,43</sup>. To evaluate the relative apico-basal  
245 position of DAPI-labeled nuclei in MHP cells, we measured the distance between the dorsal  
246 nuclear surface and the basal pole of MHP cells as a fraction of the total cell length (Figure  
247 6c3). This analysis revealed that at 2 and 5 som stages the position of the nucleus does not  
248 change significantly and is therefore unlikely to contribute to wedging of this cell population.

249

### 250 **Oscillatory constrictions progressively reduce the apical surface of MHP cells**

251 To gain a better understanding of the dynamics of apical constriction and cell internalization,  
252 the ANP of embryos ubiquitously expressing mGFP was imaged from a dorsal view using  
253 time-lapse microscopy between 2 som to 4 som (n = 2 embryos, Figure 6D and Supplemental  
254 Figure 3). The focal plane was set immediately below the EVL, at the level of the MHP.  
255 These movies revealed clusters of medially-located cells that undergo progressive cell  
256 surface reduction (color-coded in Figure 6d1-d6), while the surface area of adjacent, more  
257 lateral cells remained unchanged for the duration of imaging (yellow asterisks in Figure 6d1-  
258 d6). EVL cells came into focus immediately posterior to the cells with reducing apices. Since  
259 the EVL is drawn inward as a result of its close contact with apically constricting MHP cells

260 (Figure 6B-b2), we surmise that apical constriction proceeds in a posterior-to-anterior  
261 direction. In later movie frames, EVL cells are no longer observed within the field of view,  
262 coinciding with the proximity of the neural folds to the midline (Supplemental Figure 3),  
263 indicating that the medial EVL cells eventually lose contact with the MHP and return to their  
264 original position, allowing the neural folds to fuse at the dorsal midline.

265 To further examine the dynamics of apical constriction, the surface area of superficial  
266 ANP cells was measured at regular intervals. Cells located at the midline (MHP cells, band  
267 width of 20  $\mu\text{m}$  from the midline, Figure 7A, C) or immediately adjacent to the midline (MHP-  
268 adjacent cells, greater than 20  $\mu\text{m}$  from the midline, Figure 7B) were scored. This analysis  
269 revealed that individual cells undergo pulsed contractions. Between pulses the surface area  
270 of cells expands slightly, but not back to original values (Figure 7A, C), resulting in a gradual  
271 decrease of pulsing amplitude over time, which is more pronounced for MHP cells than their  
272 immediate neighbors.

273 Together these data indicate that MHP cells undergo progressive narrowing of their  
274 apical pole via pulsed contractions and that these cellular dynamics proceed in a posterior-to-  
275 anterior direction.

276

### 277 **Neural fold fusion is initiated at closure points and mediated by dynamic protrusive** 278 **activity**

279 In mice, neurulation proceeds unevenly along the anterior-posterior axis with multiple closure  
280 initiation sites <sup>3</sup>, raising the question of whether neural fold fusion also occurs asynchronously  
281 in zebrafish. To address this, we performed time-lapse imaging of embryos mosaically  
282 expressing mGFP from a dorsal view around the time when opposing neural folds approach

283 the midline (n= 2 embryos, Figure 8A and Supplemental Figure 4). Neuroectoderm cells of  
284 the neural fold were identified based on their elongated shape and dorsal location (unlike  
285 MHP cells they do not become internalized).

286 These movies revealed that the neural folds have an arc shape with the apex  
287 positioned anteriorly (red asterisks in Figure 8A), which is strikingly similar to the expression  
288 domain of the telencephalon marker *emx3* at the onset of neural fold convergence (inset in  
289 Figure 8A). Neural fold fusion is initiated near the apex of the arch and proceeds in an  
290 anterior-to-posterior direction for a distance of approximately 35  $\mu\text{m}$  (red dotted line in Figure  
291 8a3). At this level, defined as closure point one (C1 in Figure 8a2), neural fold fusion  
292 proceeds asynchronously, as a second closure initiation site is formed more posteriorly (C2 in  
293 Figure 8A5), defining an eye-shaped opening (white dotted oval in Figure 6 a4, a5). A  
294 zipper process then begins at the anterior and posterior corners, progressing from both  
295 ends toward the middle (Figure a6,a7; Supplemental Figure 4).

296 The events that complete neural fold fusion in amniotes involve the extension of  
297 dynamic cellular projections towards the midline as opposing neural folds approach each  
298 other<sup>17-19</sup>. These cellular extensions are thought to function as transient bridges that promote  
299 the formation of stable intermediate closure points. Likewise, we observed that zebrafish  
300 neuroectodermal cells extend filopodia across the midline to establish contact with cells from  
301 the contralateral side. Furthermore, the cell bodies hyper-extend beyond the midline (Figure  
302 6b3, b4 and Supplemental Figure 5), indicating that they interdigitate between neuroectoderm  
303 cells of the opposing neural fold. These cellular extensions are eventually retracted, clearing  
304 the midline, which coincides with the timing of epithelialization and the establishment of apical  
305 junctions (Figure 3D).

306 The presence of closure points and the usage of filopodia to establish contact with  
307 neural fold cells across the midline reveal additional aspects of forebrain neurulation that are  
308 conserved in zebrafish.

309

### 310 **Molecular characteristics of medial and lateral hinge points**

311 Key features of cells that form hinge points include apico-basal polarization, accumulation of  
312 an apical contractile machinery composed of actin filaments (F-actin) and non-muscle myosin  
313 II<sup>44</sup>. To test whether the MHP and DLHPs in the zebrafish forebrain have some or all of these  
314 characteristics and to evaluate the timing of their maturation, the localization of Pard3-GFP (a  
315 marker for apical polarity, transiently expressed following mRNA injection), F-actin  
316 (phalloidin) and phospho-Myosin Light Chain II (anti-P-MLC) was examined in 3, 4 and 5 som  
317 embryos (Figure 9).

318 Apical co-localization of Pard3-GFP and F-actin was confirmed in both the MHP and  
319 DLHPs, beginning at the 3 som stage (data not shown) and became more prominent by 4  
320 and 5 som (Figure 9A-F). Thus, while the establishment of apico-basal polarity is generally  
321 delayed in the zebrafish neural plate relative to amniotes, the cell clusters that undergo apical  
322 constriction in the ANP are epithelialized earlier than other neural plate cells, consistent with  
323 previous observations<sup>37</sup>. P-MLC accumulation at the apical pole is slightly delayed relative to  
324 Pad3-GFP, as it is only apparent by the 5 som stage in MHP cells where it overlaps with F-  
325 actin (Figure 9J-L). In contrast, P-MLC enrichment is not observed in the DLHPs (open  
326 arrowhead in Figure 9K). P-MLC also accumulates in the cell cortex of all neuroectoderm  
327 cells where it overlaps with F-actin, in addition to the basal surface of EVL cells (arrow in  
328 Figure 9H, K) and at the interface between the neuroectoderm and non-neural ectoderm

329 (dotted line in Figure 9J-L).

330           These findings reveal that both the MHP and DLHP undergo early epithelialization and  
331 accumulate F-actin at the apical cortex. However, the MHP and DLHPs are molecularly  
332 distinct structures given that the latter is not enriched for P-MLC.

333

### 334 **Myosin contractility is required for MHP formation and neural fold convergence**

335 During neural tube closure, the actomyosin cytoskeleton is thought to be a driving force for  
336 apical constriction<sup>41</sup>. To address a putative function for this molecular motor in mediating  
337 apical constriction in zebrafish, non-muscle myosin II (NMII) was blocked using blebbistatin  
338 and a translation-blocking morpholino (MO) targeting NMIIb<sup>45</sup> and the effect was analyzed in  
339 5 som embryos. As expected, P-MLC levels were normal in blebbistatin-treated embryos  
340 (since this drug blocks NMII activity but not its phosphorylation) and reduced in NMIIB-MO  
341 injected embryos (Figure 10a1'', a2'', a3''). Both treatments severely disrupted apical  
342 constriction, resulting in absence of a clearly defined MHP and failure of these cells to  
343 elongate (Figure 10a1,a1' vs Figure 10a2, a2', a3, a3'). In contrast to superficial cells, cells in  
344 the deep layer retained their elongated shape (double arrowheads in Figure 10a1 versus  
345 a2,a3). Consistent with the earlier observation that the apices of DLHP cells do not  
346 accumulate P-MLC, these cells retained their wedge shape and apical F-actin accumulation  
347 in NMIIb MO-injected embryos (open arrowheads in Figure 10a3). These observations  
348 highlight the conserved function of actomyosin in driving apical constriction in hinge point  
349 cells. The failure of MHP cells to elongate is unlikely due to the loss of cortical tension  
350 proposed by Rolo et al. (2009)<sup>15</sup> as P-MLC is present in both the superficial and deep layers  
351 of the ANP and rounded cells are restricted to the superficial layer. Another explanation is



352 that, as previously reported, apical constriction and microtubule-based cell elongation are  
353 orchestrated by the same effector proteins<sup>41</sup>, and NMII may provide feedback information on  
354 the status of apical constriction in superficial cells.

355 At a morphological level, disruption of the actomyosin network causes neural tube  
356 defects that trace back to impaired apical constriction and convergent extension in *Xenopus*  
357 embryos<sup>15</sup>. To test whether myosin is similarly required for forebrain neural tube closure in  
358 zebrafish, control (untreated and DMSO-treated) and blebbistatin-treated embryos were  
359 labeled at the 2, 5 and 7 som stage via *in situ* hybridization using the telencephalon marker  
360 *emx3* (Figure 10B) and the width of the posterior-most *emx3* domain was measured (Figure  
361 10C). In contrast to control embryos, neural fold convergence was impaired in blebbistatin-  
362 treated embryos, beginning at the 5 som stage. It is possible that impaired convergent  
363 extension or expansion of the interface between the neuroectoderm and non-neural ectoderm  
364 layers of the neural folds contribute to this defect. However, failure of MHP cells to undergo  
365 apical constriction is likely to be a significant underlying cause given that disruption of several  
366 proteins implicated in this process, including Shroom3<sup>13</sup> and GEF-H1, a RhoA-specific GEF  
367<sup>14</sup> cause severe neural tube closure defects.

368

## 369 **DISCUSSION**

370 We report here on mechanisms of forebrain morphogenesis in the zebrafish embryo and  
371 reveal that this region of the brain is formed via a mode of primary neurulation, involving the  
372 use of hinge points and neural folds.

373 The zebrafish MHP and paired DLHPs form in the superficial and deep layers of the  
374 eye field, respectively. The zebrafish MHP is more transient than its mammalian counterpart

375 since these cells eventually intercalate radially between deep layer cells, contributing to the  
376 expansion of the eye vesicle<sup>37</sup>. Hingepoints are restricted to the ANP in zebrafish, however  
377 they are also present in more posterior regions of the neural plate in amniotes. Despite this  
378 difference, individual cells in the medial zone of the hindbrain neural plate were recently  
379 shown to internalize via a myosin-dependent mechanism<sup>46</sup>. Such variation from the  
380 organized cell clusters forming hingepoints in the forebrain region of the zebrafish could be  
381 explained by the precocious epithelialization of the ANP<sup>37</sup>. It thus appears that there is a  
382 transition from clustered internalization mediated by the MHP in the forebrain to individual cell  
383 internalization in the hindbrain region.

384 A key feature of hingepoint cells is their reduced apical surface, which is in part due to  
385 actomyosin contractility<sup>13,41,47,48</sup>. Apical constriction is thought to function as a purse string to  
386 generate the force required to bring the neural folds together during cranial neurulation<sup>49</sup>. We  
387 provide evidence that the zebrafish MHP also utilizes an actomyosin-based contractile  
388 system. Assembly of this actomyosin network occurs via pulsed contractions with gradually  
389 decreasing amplitude, akin to the ratchet model first proposed in *Drosophila* and *C. elegans*  
390<sup>50-52</sup> and later reported during neural tube closure in *Xenopus*<sup>53</sup>. We further show that  
391 disruption of myosin impairs neural fold convergence. These observations indicate that the  
392 actomyosin machinery is used across all vertebrate models of neurulation to drive cranial  
393 neural tube closure.

394 In contrast to the MHP, the paired DLHPs do not require myosin to apically constrict,  
395 suggesting that DLHP formation is regulated by a distinct mechanism. Consistent with this  
396 observation, McShane and colleagues report that cell packing at a dorso-ventral boundary in  
397 the mouse neural tube causes buckling of the neuroectoderm at the DLHPs<sup>54</sup>. It is possible

398 that such a mechanism also operates during zebrafish neurulation.

399 Neural folds in chick embryos form via a series of steps involving epithelial ridging,  
400 kinking, delamination and apposition<sup>16</sup>, although the cellular basis of these morphogenetic  
401 events is not well understood. Elevation of the neural folds in the mouse cranial neural plate  
402 is dependent on expansion of the head mesenchyme<sup>55</sup>. Neural folds in the zebrafish are  
403 restricted to the ANP. The head mesenchyme is unlikely to play a significant mechanical role  
404 in neural fold elevation in zebrafish as the mesoderm layer immediately underlying the ANP is  
405 thin. We identify instead a neural fold-autonomous cell behavior, basal constriction, that may  
406 contribute to the early stages of neural fold elevation in zebrafish and possibly also in  
407 amniotes. Given that the neural folds converge medially, increasing the surface of apposition  
408 between the neuroectoderm and non-neural ectoderm, it is possible that basal constriction is  
409 transient and involves successive rows of neuroectodermal cells, akin to the epithelial rolling  
410 model described by Keller and Shook<sup>56</sup>.

411 The final step of primary neurulation involves the convergence and fusion of the neural  
412 folds at the dorsal midline. Neural fold fusion is initiated at closure points in mammals and  
413 birds, however their timing and the order in which these points close varies across species<sup>57</sup>.  
414 We observe two closure points in the zebrafish forebrain that form an eye-shaped opening  
415 that narrows from the corners in a bidirectional manner. Fusion of the neural folds is  
416 mediated by the formation of dynamic, actin-rich cellular protrusions that span the midline  
417 and establish the first points of contact with neural fold cells from the contralateral side. Akin  
418 to mice<sup>20,21</sup>, the cells that initiate contact between apposing neural folds in zebrafish derive  
419 from the neuroectoderm portion of the neural folds. The protrusive ends of the  
420 neuroectoderm cells interdigitate between their contralateral counterparts, forming a rod like

421 structure, the precursor of the telencephalon, which subsequently epithelializes. Once the  
422 neuroectoderm cells have met and fused, non-neural ectoderm cells complete their migration  
423 and fuse at the dorsal midline.

424 Together these findings have significant implications for our understanding of the  
425 evolution of neurulation and the relevance of this model organism to understand human  
426 neural tube development.

427

## 428 **METHODS**

### 429 **Zebrafish strains/ husbandry**

430 Studies were performed using wildtype (AB) strains or *Tg(emx3:YFP)<sup>b1200</sup>*[39] and embryos  
431 were raised at 28.5°C. All experiments were approved by the University of Maryland,  
432 Baltimore County's Institutional Animal Care and Use Committee (IACUC) and were  
433 performed according to national regulatory standards.

434

### 435 **Nucleic acid and morpholino injections**

436 Plasmids encoding membrane-targeted Green Fluorescent Protein (mGFP) (Richard  
437 Harland, University of California, Berkeley, CA, USA) and *pard3:egfp*[58] were linearized with  
438 NotI and transcribed using the SP6 mMESSAGE mMACHINE kit (Ambion, AM1340). For  
439 ubiquitous expression of mGFP or Par3d:eGFP, 50 pg of RNA was injected into 1-cell stage  
440 embryos. For mosaic expression of mGFP, 50 pg of RNA was injected into 1 or 2 of the four  
441 central blastomeres at the 16-cell stage. These blastomeres have a high probability for neural  
442 fate[59] and are easy to identify for reproducible injections.

443 MOs were designed and synthesized by GeneTools (Philomath, Oregon, USA) and injected  
444 into 1-cell stage embryos. *mhy10*(Non-muscle Myosin IIB, EXON2-intron2) was delivered at  
445 3ng per injection.

446  
447 *mhy10*: 5'-CTTCACAAATGTGGTCTTACCTTGA-3' [45]  
448

449 Microinjections were performed using a PCI-100 microinjector (Harvard Apparatus, Holliston,  
450 MA, USA).

451  
452 **Blebbistatin treatment**

453 90% epiboly embryos were manually dechorionated in an agarose-covered petri dish with E3  
454 medium. Once embryos reached the tailbud stage, they were placed into 50µM blebbistatin  
455 (B0560 Sigma-Aldrich) diluted with E3 and then incubated at 28.5°C. Stock solution of  
456 blebbistatin was prepared with DMSO as per manufacturer's instructions. Accordingly, a  
457 control group of embryos were treated with 1% DMSO diluted with E3 alongside every  
458 blebbistatin trial. Once the desired developmental stage was reached (2-, 5-, or 7-som),  
459 embryos were immediately fixed with 4% paraformaldehyde (PFA). As blebbistatin is light  
460 sensitive, embryos were kept in the dark as much as possible until fixation.

461  
462 **Fixed tissue preparations and immunolabeling**

463 Embryos were fixed in 4% PFA for 16 hours at 4°C overnight. Immunolabeling was performed  
464 on whole mount embryos, which were then sectioned with a Vibratome (Vibratome 1500  
465 sectioning system). Primary antibody incubation was performed for 48 hours at 4°C and  
466 secondary antibody incubation for 2.5 hours at room temperature.

467 Antibodies used: Rabbit anti-GFP at 1:1000 (Invitrogen, A11122), Rabbit anti-Sox3c at  
468 1:2000 (Gift from Michael Klymkowsky), Rabbit anti-P-myosin light chain at 1:50 (Cell  
469 Signaling Technology, #3671S), and Mouse anti-p63 at 1:200 ( Santa Cruz BioTechnology,  
470 SC-8431 no longer in production). Alexa Fluorophore secondary antibodies were all used at a  
471 1:1000 concentration: Goat anti-Rabbit -488, -568, -594 and Goat anti-Mouse -488, -  
472 594. Alexa Fluor 488-conjugated or 594-conjugated Phalloidin (Invitrogen, A12379 and  
473 A12381 ) at 1:250 and DAPI (Invitrogen, D1306) were used according to manufacturer's  
474 instructions. Sections were mounted on glass slides using ProLong Diamond Antifade  
475 Mountant (Invitrogen, P36961). *Tg(emx3:YFP)<sup>b1200</sup>* embryos were immunolabeled with anti-  
476 GFP to amplify the signal. mGFP and *pard3:eGFP*-injected embryos were not immunolabeled  
477 with anti-GFP.

478

#### 479 **Whole-mount *in situ* hybridization**

480 *In situ* hybridization was performed as described [60]. *emx3* riboprobe template was  
481 generated by PCR amplification using cDNA from 24hpf embryos.

482

483 T7 promoter: **TAATACGACTCACTATAGGG**

484 *emx3* antisense:

485 FWD: TCCATCCATCCTTCCCCCTT

486 RVS: **TAATACGACTCACTATAGGG**GTGCTGACTGCCTTTCCTCT

487

488 DIG-labeled riboprobes were generated using 2ul of PCR template with the Roche DIG RNA

489 Labeling Kit (T7) (Sigma aldrich, SKU 11277073910)

490

#### 491 **Whole-mount imaging**

492 Whole-mount imaging was carried out using a Zeiss Axioscope2 microscope. Embryos were  
493 imaged in a 2.5% glycerol solution.

494

#### 495 **Confocal microscopy**

496 Time-lapse microscopy was performed as previously described [61]. Embryos were imaged  
497 using a Leica confocal microscope (Leica SP5 TCS 4D) at 15 sec/frame capturing  $<.5\mu\text{m}$  of  
498 tissue. All fluorescently labeled sections were imaged using a Leica confocal microscope  
499 (Leica SP5 TCS 4D).

500

#### 501 **Data Quantification**

502 Medial-most-p63-positive-domain migration, Figure 3J: For each hemisphere of a tissue  
503 section, the distance between the medial-most p63 positive nucleus and the midline was  
504 manually scored. For each embryo, measurements were taken from tissue sections ranging  
505 along the anterior-posterior axis of the forebrain.

506

507 Deep layer cell morphology measurements, Figure 5: Cells were manually scored from non-  
508 projected z-stack images, where cellular outlines were visually determined from the mGFP  
509 signal. Cells were labeled as neuroectoderm neural fold cells based on the fan-like pattern of  
510 their basal projections in contact with the non-neural ectoderm. All other cells scored were  
511 within the morphologically distinct eye vesicle and were labeled as eye field cells. Neural  
512 ectoderm neural fold cells and eye field cells are not morphologically distinguishable at the 2  
513 somitic stage and thus were not given cell type identities at that developmental stage.

514

515 Medial hinge cell morphology measurements, Figure 6C: Cells were manually scored from  
516 non-projected z-stack images of the overlay between the labeled actin cytoskeleton  
517 (phalloidin) and nucleus (DAPI, not shown in Figure 6) channels. Cellular outlines were  
518 visually determined from the phalloidin signal. For the nuclear position measurement (Fig  
519 6c3), the distance from the dorsal edge of the nucleus to the basal membrane of the cell was  
520 scored and divided by the total cell length.

521

522 Cell ratcheting, Figure 7: Live movie z-stacks for the first 35 minutes (~2-4 somites, n=2) of  
523 each movie were max projected and cropped so the midline of the tissue horizontally  
524 bisected the image frame. The mGFP signal was then inverted and thresholded to produce a  
525 binary image. Measurements for individual cell surface areas were captured using the magic  
526 wand tool in ImageJ for every frame (15 seconds) until the cell left the field of view. Plotted on  
527 the x-axis is the order of frame measurements (frame 0, frame 1, frame 2,...) divided by the  
528 total number of frames for which that cell was scored to standardize between 0 and 1. Plotted  
529 on the y-axis, the initial value of each cell's surface area was subtracted from all  
530 measurements for that cell to initialize surface area's to zero. The data was binned (n=50) to  
531 obtain mean measurements and confidence intervals. Cells that underwent mitosis anytime  
532 during the movie were excluded. Cells were labeled as MHP if their surface area centroid  
533 from the first frame (t=0) was +/- 20  $\mu\text{m}$  from the midline with MHP-adjacent cells being  
534 labeled as such if their centroid was > +/-20  $\mu\text{m}$  from the midline.

535



536 *emx3 in situ* hybridization measurements, Figure 10C: The distance between the lateral  
537 edges of the posterior-most extent of the *emx3* domain was manually scored for each  
538 embryo.

539

#### 540 **Statistical Analysis**

541 The Mann-Whitney U test was used for all significance testing. The python function  
542 `scipy.stats.mannwhitneyu(alternative='two-sided')` was used to calculate the test statistic and  
543 P-value for each significance test. Graphs were generated using the python Seaborn  
544 package with the following functions: `seaborn.boxplot()`, `seaborn.lmplot()`, `seaborn.violinplot()`,  
545 `seaborn.lineplot()`.

546

#### 547 **Data availability**

548 The authors declare that all data supporting the findings of this study are available within the  
549 article and its supplementary information files or from the corresponding author upon  
550 reasonable request.

551

552

553

554

555

556

557

558

559 **REFERENCES**

- 560  
561 1 Copp, A. J., Greene, N. D. & Murdoch, J. N. Dishevelled: linking convergent  
562 extension with neural tube closure. *Trends Neurosci* **26**, 453-455,  
563 doi:10.1016/S0166-2236(03)00212-1 (2003).
- 564 2 Keller, R. Shaping the vertebrate body plan by polarized embryonic cell  
565 movements. *Science* **298**, 1950-1954, doi:10.1126/science.1079478 (2002).
- 566 3 Copp, A. J., Greene, N. D. & Murdoch, J. N. The genetic basis of mammalian  
567 neurulation. *Nat Rev Genet* **4**, 784-793, doi:10.1038/nrg1181 (2003).
- 568 4 Morriss-Kay, G. M. Growth and development of pattern in the cranial neural  
569 epithelium of rat embryos during neurulation. *J Embryol Exp Morphol* **65 Suppl**,  
570 225-241 (1981).
- 571 5 Baker, P. C. & Schroeder, T. E. Cytoplasmic filaments and morphogenetic  
572 movement in the amphibian neural tube. *Dev Biol* **15**, 432-450 (1967).
- 573 6 Sadler, T. W., Greenberg, D., Coughlin, P. & Lessard, J. L. Actin distribution  
574 patterns in the mouse neural tube during neurulation. *Science* **215**, 172-174,  
575 doi:10.1126/science.7031898 (1982).
- 576 7 Morriss-Kay, G. & Tuckett, F. The role of microfilaments in cranial neurulation in  
577 rat embryos: effects of short-term exposure to cytochalasin D. *J Embryol Exp*  
578 *Morphol* **88**, 333-348 (1985).
- 579 8 Schoenwolf, G. C., Folsom, D. & Moe, A. A reexamination of the role of  
580 microfilaments in neurulation in the chick embryo. *Anat Rec* **220**, 87-102,  
581 doi:10.1002/ar.1092200111 (1988).
- 582 9 Ybot-Gonzalez, P. & Copp, A. J. Bending of the neural plate during mouse  
583 spinal neurulation is independent of actin microfilaments. *Dev Dyn* **215**, 273-  
584 283, doi:10.1002/(SICI)1097-0177(199907)215:3<273::AID-AJA9>3.0.CO;2-H  
585 (1999).
- 586 10 Kinoshita, N., Sasai, N., Misaki, K. & Yonemura, S. Apical accumulation of Rho  
587 in the neural plate is important for neural plate cell shape change and neural  
588 tube formation. *Mol Biol Cell* **19**, 2289-2299, doi:10.1091/mbc.E07-12-1286  
589 (2008).
- 590 11 Hildebrand, J. D. & Soriano, P. Shroom, a PDZ domain-containing actin-binding  
591 protein, is required for neural tube morphogenesis in mice. *Cell* **99**, 485-497  
592 (1999).
- 593 12 Xu, W., Baribault, H. & Adamson, E. D. Vinculin knockout results in heart and  
594 brain defects during embryonic development. *Development* **125**, 327-337  
595 (1998).
- 596 13 Haigo, S. L., Hildebrand, J. D., Harland, R. M. & Wallingford, J. B. Shroom  
597 induces apical constriction and is required for hingepoint formation during  
598 neural tube closure. *Curr Biol* **13**, 2125-2137 (2003).
- 599 14 Itoh, K., Ossipova, O. & Sokol, S. Y. GEF-H1 functions in apical constriction  
600 and cell intercalations and is essential for vertebrate neural tube closure. *J Cell*  
601 *Sci* **127**, 2542-2553, doi:10.1242/jcs.146811 (2014).

- 602 15 Rolo, A., Skoglund, P. & Keller, R. Morphogenetic movements driving neural  
603 tube closure in *Xenopus* require myosin IIB. *Dev Biol* **327**, 327-338,  
604 doi:10.1016/j.ydbio.2008.12.009 (2009).
- 605 16 Lawson, A., Anderson, H. & Schoenwolf, G. C. Cellular mechanisms of neural  
606 fold formation and morphogenesis in the chick embryo. *Anat Rec* **262**, 153-168,  
607 doi:10.1002/1097-0185(20010201)262:2<153::AID-AR1021>3.0.CO;2-W  
608 (2001).
- 609 17 Pyrgaki, C., Trainor, P., Hadjantonakis, A. K. & Niswander, L. Dynamic imaging  
610 of mammalian neural tube closure. *Dev Biol* **344**, 941-947,  
611 doi:10.1016/j.ydbio.2010.06.010 (2010).
- 612 18 Ray, H. J. & Niswander, L. A. Dynamic behaviors of the non-neural ectoderm  
613 during mammalian cranial neural tube closure. *Dev Biol* **416**, 279-285,  
614 doi:10.1016/j.ydbio.2016.06.030 (2016).
- 615 19 Rolo, A. *et al.* Regulation of cell protrusions by small GTPases during fusion of  
616 the neural folds. *Elife* **5**, e13273, doi:10.7554/eLife.13273 (2016).
- 617 20 Geelen, J. A. & Langman, J. Closure of the neural tube in the cephalic region of  
618 the mouse embryo. *Anat Rec* **189**, 625-640, doi:10.1002/ar.1091890407 (1977).
- 619 21 Geelen, J. A. & Langman, J. Ultrastructural observations on closure of the  
620 neural tube in the mouse. *Anat Embryol (Berl)* **156**, 73-88 (1979).
- 621 22 Massarwa, R., Ray, H. J. & Niswander, L. Morphogenetic movements in the  
622 neural plate and neural tube: mouse. *Wiley Interdiscip Rev Dev Biol* **3**, 59-68,  
623 doi:10.1002/wdev.120 (2014).
- 624 23 Waterman, R. E. Topographical changes along the neural fold associated with  
625 neurulation in the hamster and mouse. *Am J Anat* **146**, 151-171,  
626 doi:10.1002/aja.1001460204 (1976).
- 627 24 Criley, B. B. Analysis of embryonic sources and mechanisms of development of  
628 posterior levels of chick neural tubes. *J Morphol* **128**, 465-501,  
629 doi:10.1002/jmor.1051280406 (1969).
- 630 25 Griffith, C. M., Wiley, M. J. & Sanders, E. J. The vertebrate tail bud: three germ  
631 layers from one tissue. *Anat Embryol (Berl)* **185**, 101-113 (1992).
- 632 26 Lowery, L. A. & Sive, H. Strategies of vertebrate neurulation and a re-evaluation  
633 of teleost neural tube formation. *Mech Dev* **121**, 1189-1197,  
634 doi:10.1016/j.mod.2004.04.022 (2004).
- 635 27 Andres Collazo, J. A. B., and Ray Keller. A Phylogenetic Perspective on Teleost  
636 Gastrulation. *The American Naturalist* **144**, 133-152 (1994).
- 637 28 Kimmel, C. B., Ballard, W. W., Kimmel, S. R., Ullmann, B. & Schilling, T. F.  
638 Stages of embryonic development of the zebrafish. *Dev Dyn* **203**, 253-310,  
639 doi:10.1002/aja.1002030302 (1995).
- 640 29 Papan, C. & Campos-Ortega, J. A. On the formation of the neural keel and  
641 neural tube in the zebrafish *Danio (Brachydanio) rerio*. *Roux Arch Dev Biol* **203**,  
642 178-186, doi:10.1007/BF00636333 (1994).
- 643 30 Hong, E. & Brewster, R. N-cadherin is required for the polarized cell behaviors  
644 that drive neurulation in the zebrafish. *Development* **133**, 3895-3905,  
645 doi:10.1242/dev.02560 (2006).
- 646 31 Strahle, U. & Blader, P. Early neurogenesis in the zebrafish embryo. *FASEB J*  
647 **8**, 692-698, doi:10.1096/fasebj.8.10.8050667 (1994).

- 648 32 Reichenbach, A., Schaaf, P. & Schneider, H. Primary neurulation in teleosts--  
649 evidence for epithelial genesis of central nervous tissue as in other vertebrates.  
650 *J Hirnforsch* **31**, 153-158 (1990).
- 651 33 Miyayama, Y. & Fujimoto, T. Fine morphological study of neural tube formation  
652 in the teleost, *Oryzias latipes*. *Okajimas Folia Anat Jpn* **54**, 97-120 (1977).
- 653 34 Schmidt, R., Strahle, U. & Scholpp, S. Neurogenesis in zebrafish - from embryo  
654 to adult. *Neural Dev* **8**, 3, doi:10.1186/1749-8104-8-3 (2013).
- 655 35 Cearns, M. D., Escuin, S., Alexandre, P., Greene, N. D. & Copp, A. J.  
656 Microtubules, polarity and vertebrate neural tube morphogenesis. *J Anat* **229**,  
657 63-74, doi:10.1111/joa.12468 (2016).
- 658 36 Yamaguchi, Y. & Miura, M. How to form and close the brain: insight into the  
659 mechanism of cranial neural tube closure in mammals. *Cell Mol Life Sci* **70**,  
660 3171-3186, doi:10.1007/s00018-012-1227-7 (2013).
- 661 37 Ivanovitch, K., Cavodeassi, F. & Wilson, S. W. Precocious acquisition of  
662 neuroepithelial character in the eye field underlies the onset of eye  
663 morphogenesis. *Dev Cell* **27**, 293-305, doi:10.1016/j.devcel.2013.09.023  
664 (2013).
- 665 38 England, S. J., Blanchard, G. B., Mahadevan, L. & Adams, R. J. A dynamic fate  
666 map of the forebrain shows how vertebrate eyes form and explains two causes  
667 of cyclopia. *Development* **133**, 4613-4617, doi:10.1242/dev.02678 (2006).
- 668 39 Viktorin, G., Chiuchitu, C., Rissler, M., Varga, Z. M. & Westerfield, M. Emx3 is  
669 required for the differentiation of dorsal telencephalic neurons. *Dev Dyn* **238**,  
670 1984-1998, doi:10.1002/dvdy.22031 (2009).
- 671 40 Schroeder, T. E. Neurulation in *Xenopus laevis*. An analysis and model based  
672 upon light and electron microscopy. *J Embryol Exp Morphol* **23**, 427-462  
673 (1970).
- 674 41 Suzuki, M., Morita, H. & Ueno, N. Molecular mechanisms of cell shape changes  
675 that contribute to vertebrate neural tube closure. *Dev Growth Differ* **54**, 266-  
676 276, doi:10.1111/j.1440-169X.2012.01346.x (2012).
- 677 42 Smith, J. L. & Schoenwolf, G. C. Cell cycle and neuroepithelial cell shape  
678 during bending of the chick neural plate. *Anat Rec* **218**, 196-206,  
679 doi:10.1002/ar.1092180215 (1987).
- 680 43 Smith, J. L. & Schoenwolf, G. C. Role of cell-cycle in regulating neuroepithelial  
681 cell shape during bending of the chick neural plate. *Cell Tissue Res* **252**, 491-  
682 500 (1988).
- 683 44 Lee, J. Y. & Harland, R. M. Endocytosis is required for efficient apical  
684 constriction during *Xenopus* gastrulation. *Curr Biol* **20**, 253-258,  
685 doi:10.1016/j.cub.2009.12.021 (2010).
- 686 45 Gutzman, J. H., Sahu, S. U. & Kwas, C. Non-muscle myosin IIA and IIB  
687 differentially regulate cell shape changes during zebrafish brain morphogenesis.  
688 *Dev Biol* **397**, 103-115, doi:10.1016/j.ydbio.2014.10.017 (2015).
- 689 46 Araya, C. *et al.* Cdh2 coordinates Myosin-II dependent internalisation of the  
690 zebrafish neural plate. *Sci Rep* **9**, 1835, doi:10.1038/s41598-018-38455-w  
691 (2019).
- 692 47 Karfunkel, P. The activity of microtubules and microfilaments in neurulation in  
693 the chick. *J Exp Zool* **181**, 289-301, doi:10.1002/jez.1401810302 (1972).

- 694 48 Lee, C., Scherr, H. M. & Wallingford, J. B. Shroom family proteins regulate  
695 gamma-tubulin distribution and microtubule architecture during epithelial cell  
696 shape change. *Development* **134**, 1431-1441, doi:10.1242/dev.02828 (2007).
- 697 49 Sawyer, J. M. *et al.* Apical constriction: a cell shape change that can drive  
698 morphogenesis. *Dev Biol* **341**, 5-19, doi:10.1016/j.ydbio.2009.09.009 (2010).
- 699 50 Martin, A. C., Kaschube, M. & Wieschaus, E. F. Pulsed contractions of an actin-  
700 myosin network drive apical constriction. *Nature* **457**, 495-499,  
701 doi:10.1038/nature07522 (2009).
- 702 51 Martin, A. C. & Goldstein, B. Apical constriction: themes and variations on a  
703 cellular mechanism driving morphogenesis. *Development* **141**, 1987-1998,  
704 doi:10.1242/dev.102228 (2014).
- 705 52 Solon, J., Kaya-Copur, A., Colombelli, J. & Brunner, D. Pulsed forces timed by  
706 a ratchet-like mechanism drive directed tissue movement during dorsal closure.  
707 *Cell* **137**, 1331-1342, doi:10.1016/j.cell.2009.03.050 (2009).
- 708 53 Suzuki, M. *et al.* Distinct intracellular Ca(2+) dynamics regulate apical  
709 constriction and differentially contribute to neural tube closure. *Development*  
710 **144**, 1307-1316, doi:10.1242/dev.141952 (2017).
- 711 54 McShane, S. G. *et al.* Cellular basis of neuroepithelial bending during mouse  
712 spinal neural tube closure. *Dev Biol* **404**, 113-124,  
713 doi:10.1016/j.ydbio.2015.06.003 (2015).
- 714 55 Zohn, I. E., Anderson, K. V. & Niswander, L. The Hectd1 ubiquitin ligase is  
715 required for development of the head mesenchyme and neural tube closure.  
716 *Dev Biol* **306**, 208-221, doi:10.1016/j.ydbio.2007.03.018 (2007).
- 717 56 Keller, R. & Shook, D. The bending of cell sheets--from folding to rolling. *BMC*  
718 *Biol* **9**, 90, doi:10.1186/1741-7007-9-90 (2011).
- 719 57 Nikolopoulou, E., Galea, G. L., Rolo, A., Greene, N. D. & Copp, A. J. Neural  
720 tube closure: cellular, molecular and biomechanical mechanisms. *Development*  
721 **144**, 552-566, doi:10.1242/dev.145904 (2017).
- 722 58 von Trotha, J.W., Campos-Ortega, J.A., Reugels, A.M. Apical localization of  
723 ASIP/PAR-3:EGFP in zebrafish neuroepithelial cells involves the  
724 oligomerization domain CR1, the PDZ domains, and the C-terminal portion of  
725 the protein. *Dev Dyn* **235**, 967-77 (2006).
- 726 59 Strehlow, D., Heinrich, G. & Gilbert, W. The fates of the blastomeres of the 16-  
727 cell zebrafish embryo. *Development* **120**, 1791-1798 (1994).
- 728 60 Thisse, C., Thisse, B., Schilling, T. F. & Postlethwait, J. H. Structure of the  
729 zebrafish *snail1* gene and its expression in wild-type, *spadetail* and *no tail*  
730 mutant embryos. *Development* **119**, 1203-1215 (1993).
- 731 61 Jayachandran, P., Hong, E. & Brewster, R. Labeling and imaging cells in the  
732 zebrafish hindbrain. *J Vis Exp*, doi:10.3791/1976 (2010).
- 733  
734  
735  
736  
737  
738  
739

740  
741  
742  
743  
744  
745  
746

## 747 **ACKNOWLEDGEMENTS**

748 Funds from Howard Hughes Medical Institute through the UMBC Precollege and  
749 Undergraduate Science Education Program supported J. Werner and D. Brooks. Funds from  
750 NIH/NIGMS grants # T32-GM055036 and # R25-GM066706 and NSF LSAMP BD grant #  
751 1500511 to UMBC supported M. Negesse. Funds from NSF LSAMP grant # 1619676 to  
752 UMBC supported J. Johnson. Funds from NIH/NIGMS MARCU\*STAR T34 grant # HHS  
753 00026 to UMBC supported D. Brooks and A. Caldwell. We thank the following people for their  
754 contributions: Tagide deCarvalho for her help with confocal imaging and image processing;  
755 Corinne Houart for the *Tg(emx3:YFP)<sup>b1200</sup>* transgenic line; Jennifer Gutzman for the gift of  
756 *myh10* morpholino and Mark Van Doren for his comments on the manuscript.

757

## 758 **AUTHOR CONTRIBUTIONS**

759 J.W. designed and performed all experiments and carried out data analysis. M.N. identified  
760 neural fold closure points, annotated movie files and generated illustrations. D.B. and A.C.  
761 contributed to the experiments and analysis of cell polarity and myosin function. J.J.  
762 contributed to the analysis of myosin function. R.B. oversaw experimental design and  
763 analysis and wrote the manuscript.

764

## 765 **COMPETING INTERESTS**

766 The authors declare no competing interests

767

768 **MATERIALS AND CORRESPONDENCE**

769 Rachel Brewster

770

771 **FIGURES**

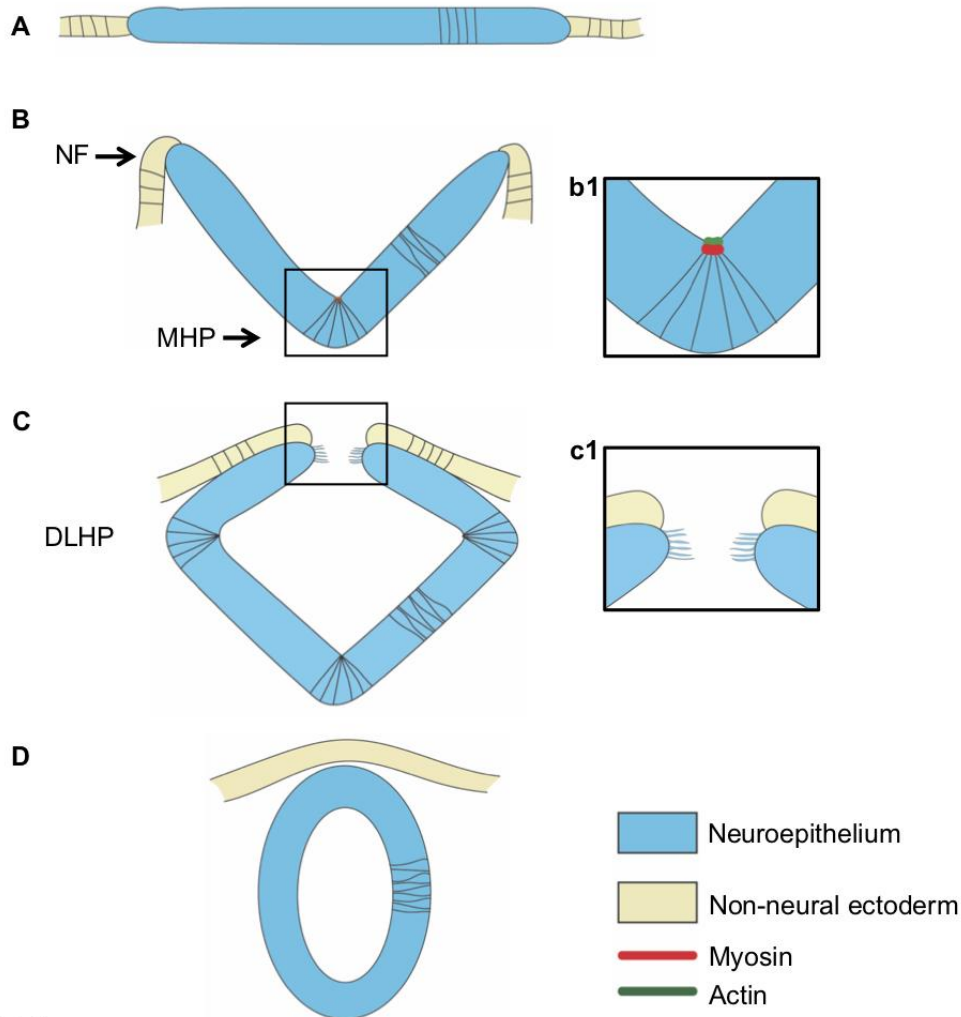

**FIGURE 1**

772

773

774

775

776

777

778

779

780

781

782

783

784

785

786

787

788

789

**Figure 1. Neurulation in amniotes. Cross sectional illustration of stages of neurulation in amniotes.** (A) The neural plate and adjacent non neural ectoderm. (B) Medial hinge point formation shapes the neural groove and elevates the neural folds. (b1) Illustration of medial hinge point cells that are apically-constricted and enriched for actomyosin at their apex. (C) Dorso-lateral hinge point formation brings the neural folds in close apposition. (c1) Filopodial extensions establish contact between neural fold cells across the midline. In the mouse forebrain the first contact is established between neuroectodermal cells. (D) The neural folds fuse medially, separating the epidermis from the neural tube. Abbreviations: DLHP = dorso-lateral hinge point; MHP = medial hinge point; NF = neural fold.



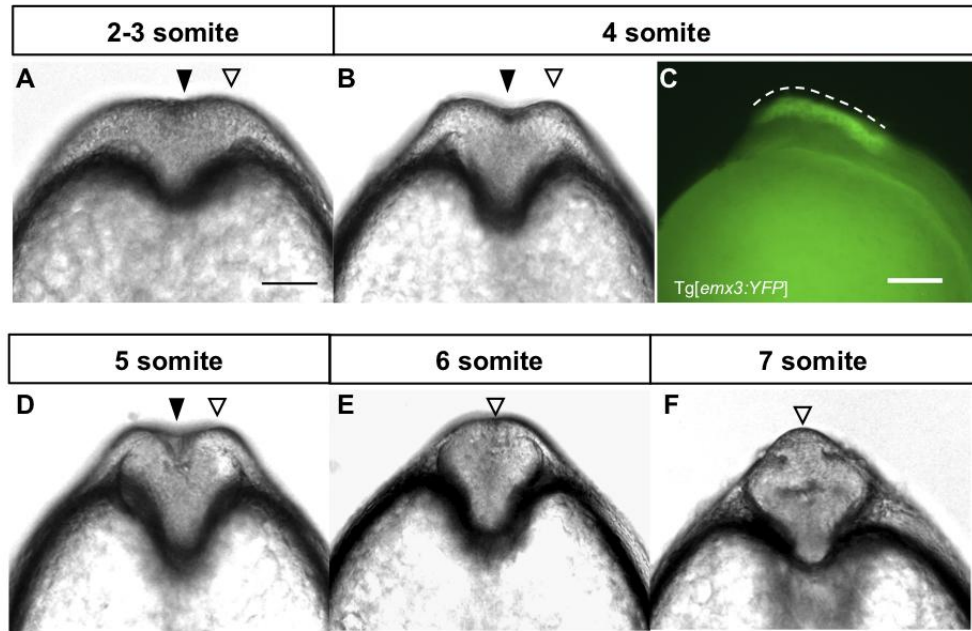

790  
791  
792  
793  
794  
795  
796  
797  
798  
799  
800  
801  
802  
803  
804  
805  
806  
807

**Figure 2. Presence of a neural groove and neural fold-like structures in the zebrafish forebrain.** (A, B, D-F) Optical sections at the level of the forebrain of WT embryos at the 2-3 som (A), 4 som (B), 5 som (D), 6 som (E) and 7 som (F) stages. (C) Side view of a 4 som Tg[emx3:YFP] embryo. Annotations: black arrowhead = median groove, white open arrowhead = elevated neural-fold-like structure, dotted line = A-P range of the neural folds. Scale bars in A and C: 100 μm.

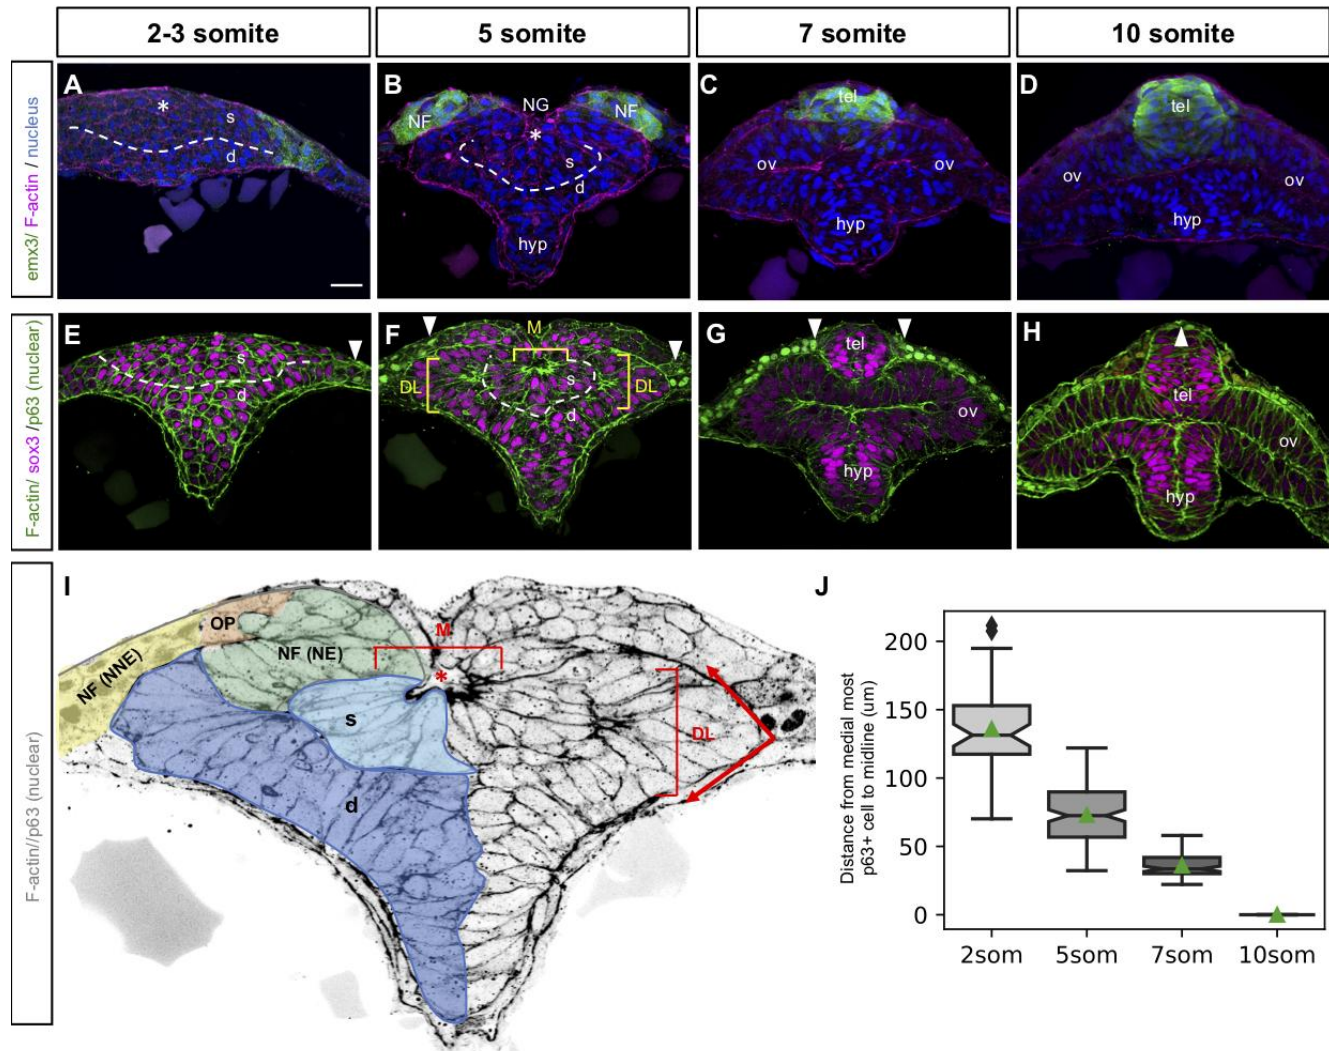

808  
809  
810  
811  
812  
813  
814  
815  
816  
817  
818  
819  
820  
821  
822  
823  
824  
825  
826

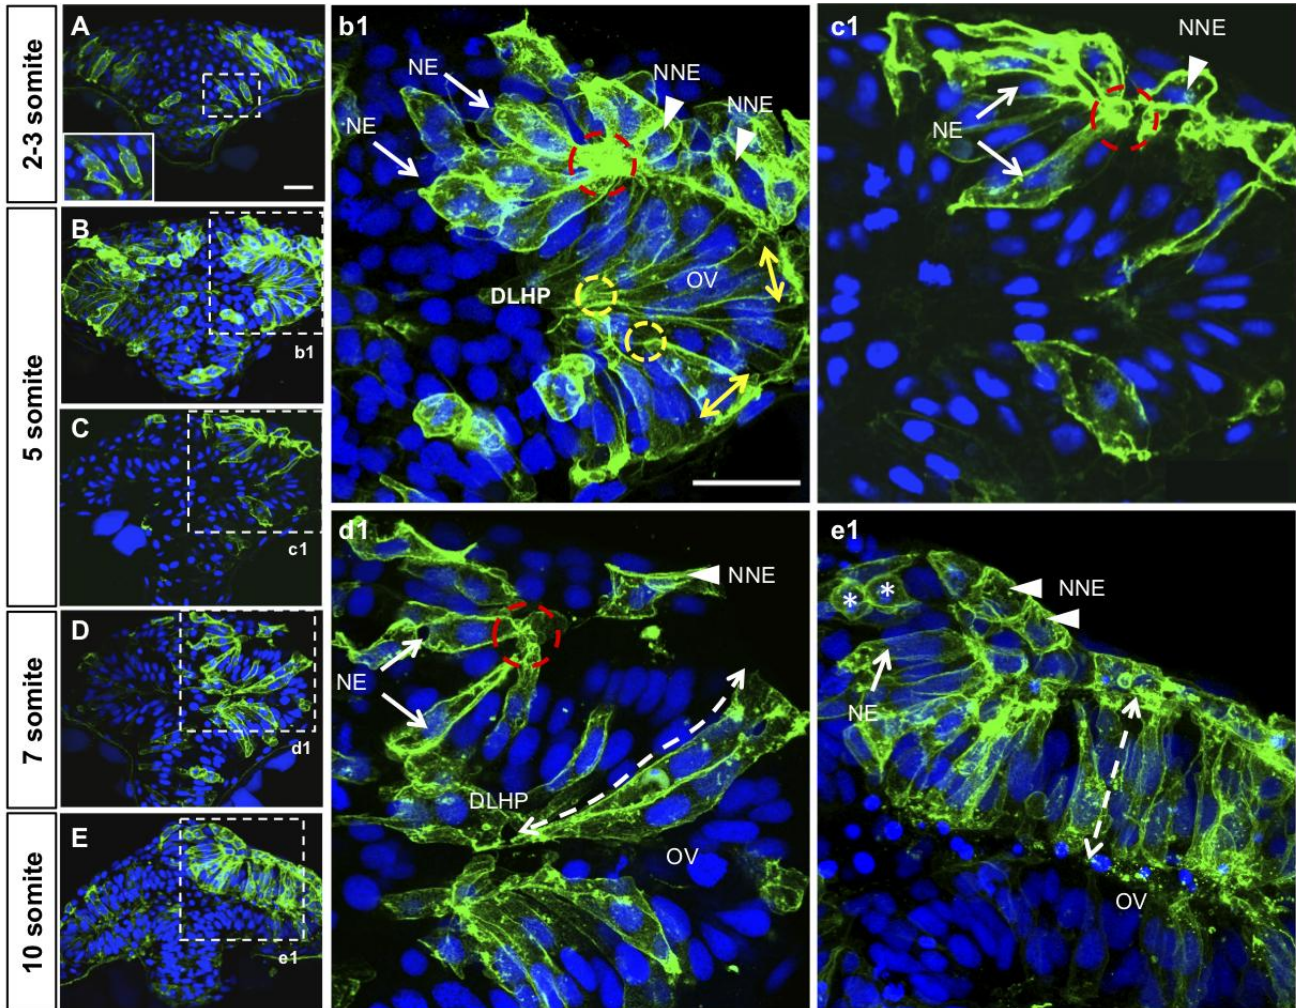

827  
 828 **Figure 4. Cell shape changes in the deep layer of the ANP that contribute to DLHP and neural fold**  
 829 **formation.** (A-E) Transverse section, at the level of the forebrain, of embryos at the 2-3 (A), 5 (B, b1, C, c1), 7  
 830 (D, d1) and 10 (E, e1) somite stages mosaically-expressing mGFP (green) and labeled with the nuclear marker  
 831 DAPI (blue). The inset in A is a higher magnification of dashed area in A. (b1-e1) Higher magnifications of  
 832 regions delineated by dotted lines in (A-E). Annotations: red dashed circle = basal constriction of NE component  
 833 of neural fold; yellow circle = apical constriction of DLHP cells; arrows = NE component of neural fold;  
 834 arrowheads = NNE component of neural folds; double dashed arrow = elongated deep cells of the optic vesicle,  
 835 asterisks = dividing cells in the prospective telencephalon. Scale bars: 25  $\mu$ m in A and b1.

836  
 837  
 838  
 839

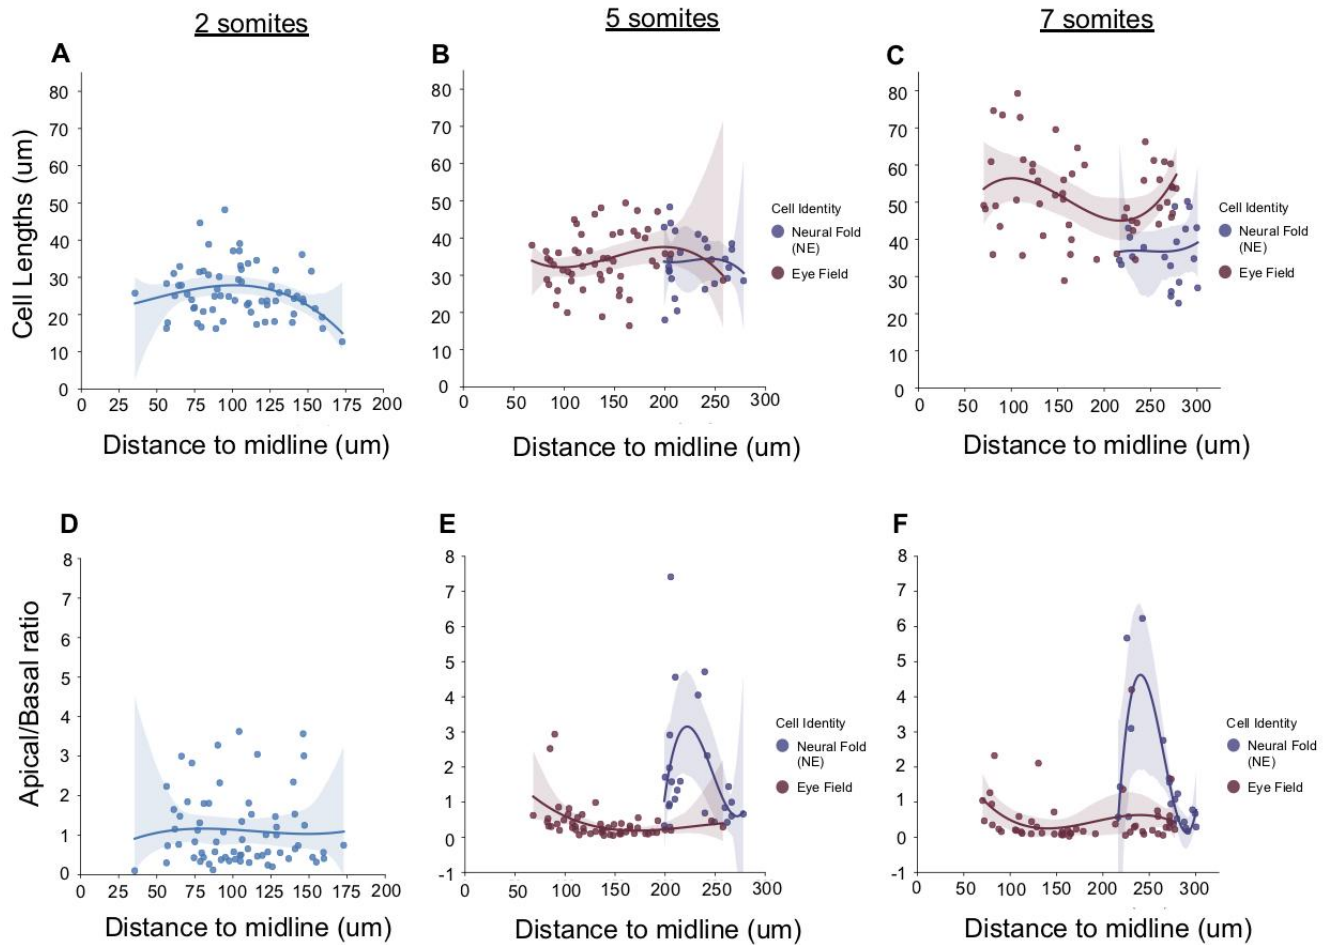

840  
841  
842  
843  
844  
845  
846  
847  
848  
849  
850  
851  
852  
853  
854  
855  
856

**Figure 5. Measurements of cell shape changes in the deep neuroectodermal layer and neural folds.** (A-C) Measurements of cell lengths ( $\mu\text{M}$ , Y axis) of m-GFP-labeled cells at different positions relative to the ANP midline ( $\mu\text{M}$ , X axis). Measurements begin in the region fated to become the optic vesicles. (D-F) Measurements of the apico:basal surface ratio of m-GFP-labeled cells at different positions relative to the ANP midline ( $\mu\text{M}$ , X axis). Measurements begin in the region fated to form the optic vesicles. The original scatter plot was fitted to a 3<sup>rd</sup> degree polynomial. Confidence intervals for the polynomial are 95% and were calculated with 1000 bootstraps. Color code: blue = neuroectodermal cells of the deep layer of 2 som stage embryos that are not yet identifiable based on cellular morphology; red = cells that form the optic vesicles; blue = cells that form the neuroectodermal component of the neural folds.

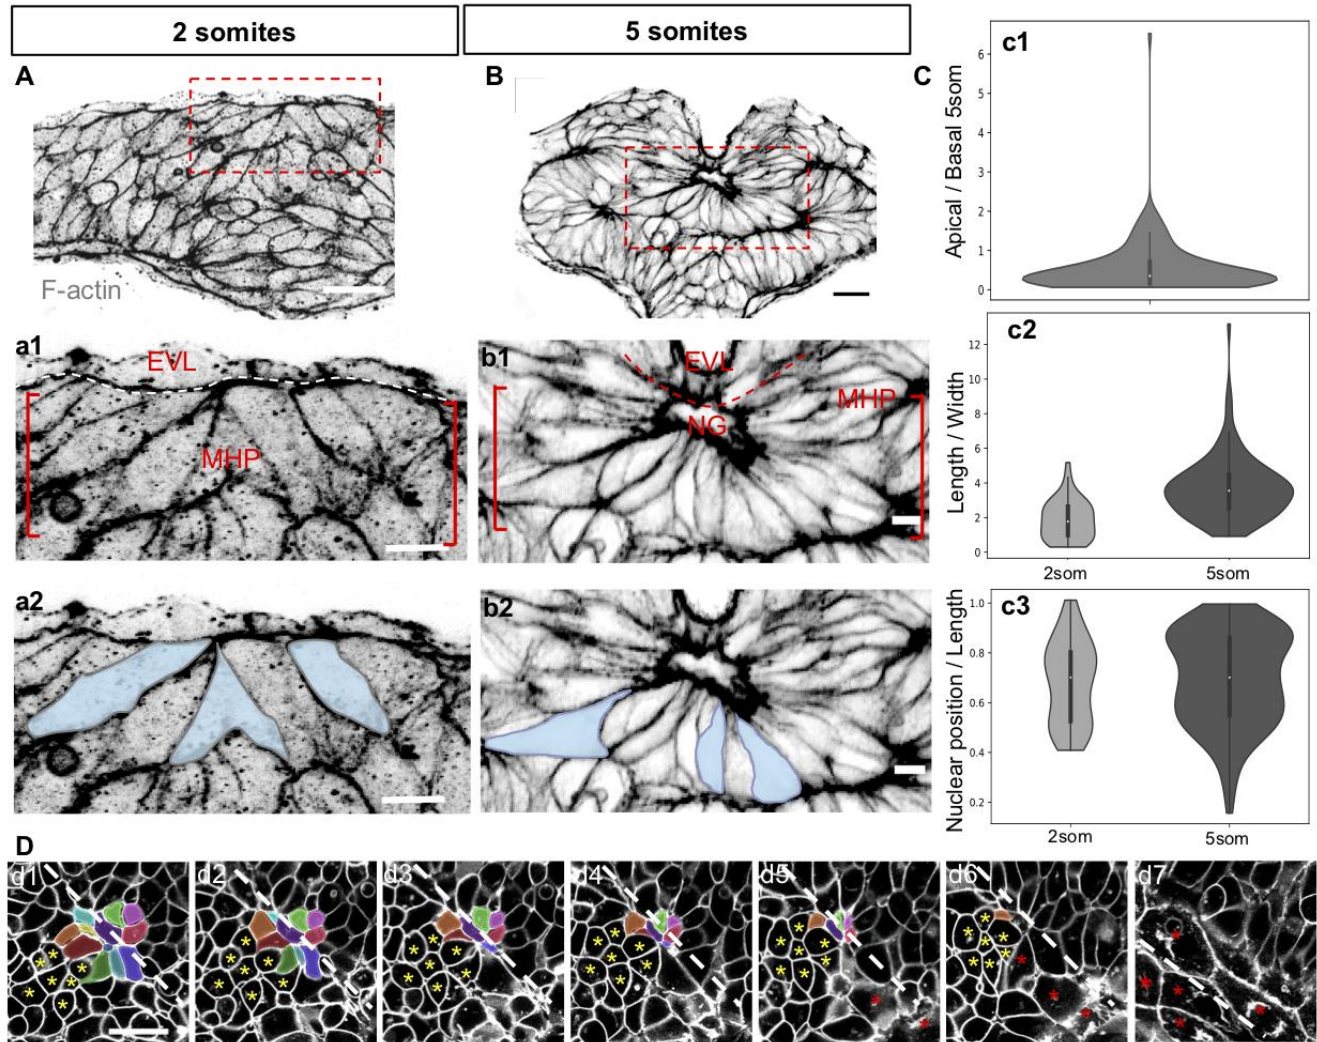

857  
858  
859  
860  
861  
862  
863  
864  
865  
866  
867  
868  
869  
870  
871  
872  
873  
874

**Figure 6. Apical constriction of MHP cells.** (A-b2) Transverse sections through the ANP at the 2 (A, a1, a2) and 5 (B, b1, b2) som stages labeled with phalloidin (shown in greyscale). (a1-b2) are higher magnifications of the boxed areas in A and B, revealing the organization of the medial ANP (a1, b1) and the shape of individual MHP cells pseudo-colored in blue (a2, b2). (C) Quantitation of cell shape changes. (c1) Measurements of apical:basal surface ratio. (c2) Measurement of length-to-width (LWR) ratio at 2 som (n= 47 cells from 5 embryos) and 5 som (n= 115 cells from 4 embryos). A Mann-Whitney two-sided U Test revealed that the LWR increase between 2 som and 5 som is statistically significant ( $P = 7.80e^{-11}$ ). (c3) Relative position of nucleus at 2 and 5 som measured in the same cell population (c3). Mean nuclear position/cell length of  $.682 \pm .0240$  at 2 som vs  $.696 \pm .0174$  at 5 som is not statistically significant using a Mann Whitney U test ( $P = .419$ ). (E) Still frames of time lapse movie of m-GFP labeled embryo imaged from a dorsal view. Individual MHP cells are pseudo-colored, A cluster of cells adjacent to the MHP is indicated with yellow asterisks and EVL cells are labeled with red asterisks. Abbreviations: EVL = enveloping layer; MHP = medial hinge point; NG = neural groove. Annotations: asterisk = medial groove; brackets = MHP region. Scale bars: 25  $\mu\text{m}$  in A and B, 10  $\mu\text{m}$  in a1, a2, b1, b2, d1.

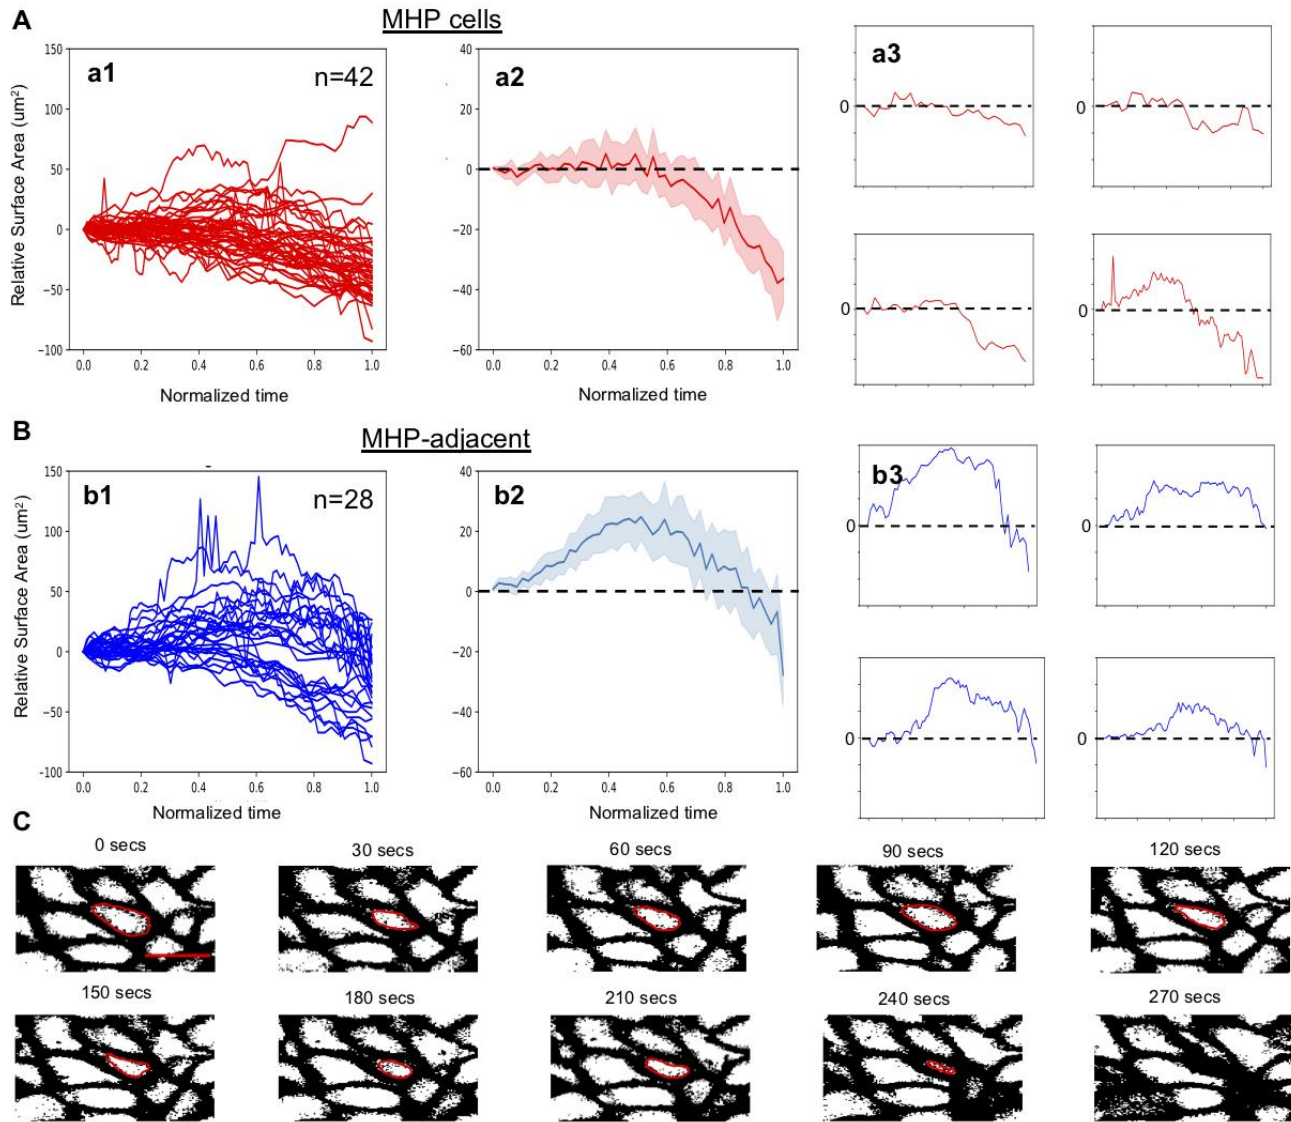

875  
876  
877  
878  
879  
880  
881  
882  
883  
884  
885  
886  
887  
888  
889  
890  
891  
892  
893

**Figure 7. Oscillatory constriction with decreasing amplitude reduces the apical surface of MHP cells.** (A) Measurements of medial, MHP cells. (a1) Relative apical surface areas over time for individual MHP cells. (a2) Mean values of MHP relative apical surface areas over time, 95% confidence interval. (a3) Representative traces of relative apical surface areas over time for individual MHP cells. (B) Measurements of MHP-adjacent cells. (b1) Relative apical surface areas over time for individual MHP-adjacent cells. (b2) Mean values of MHP-adjacent relative apical surface areas over time, 95% confidence interval. (a3) Representative traces of relative apical surface areas over time for individual MHP-adjacent cells. (C) Still frames of time-lapse movie of m-GFP labeled cells shown in grey-scale. The oscillatory behavior of one cell, outlined in red, is shown over time. Scale bar: 10  $\mu\text{m}$  in c1.

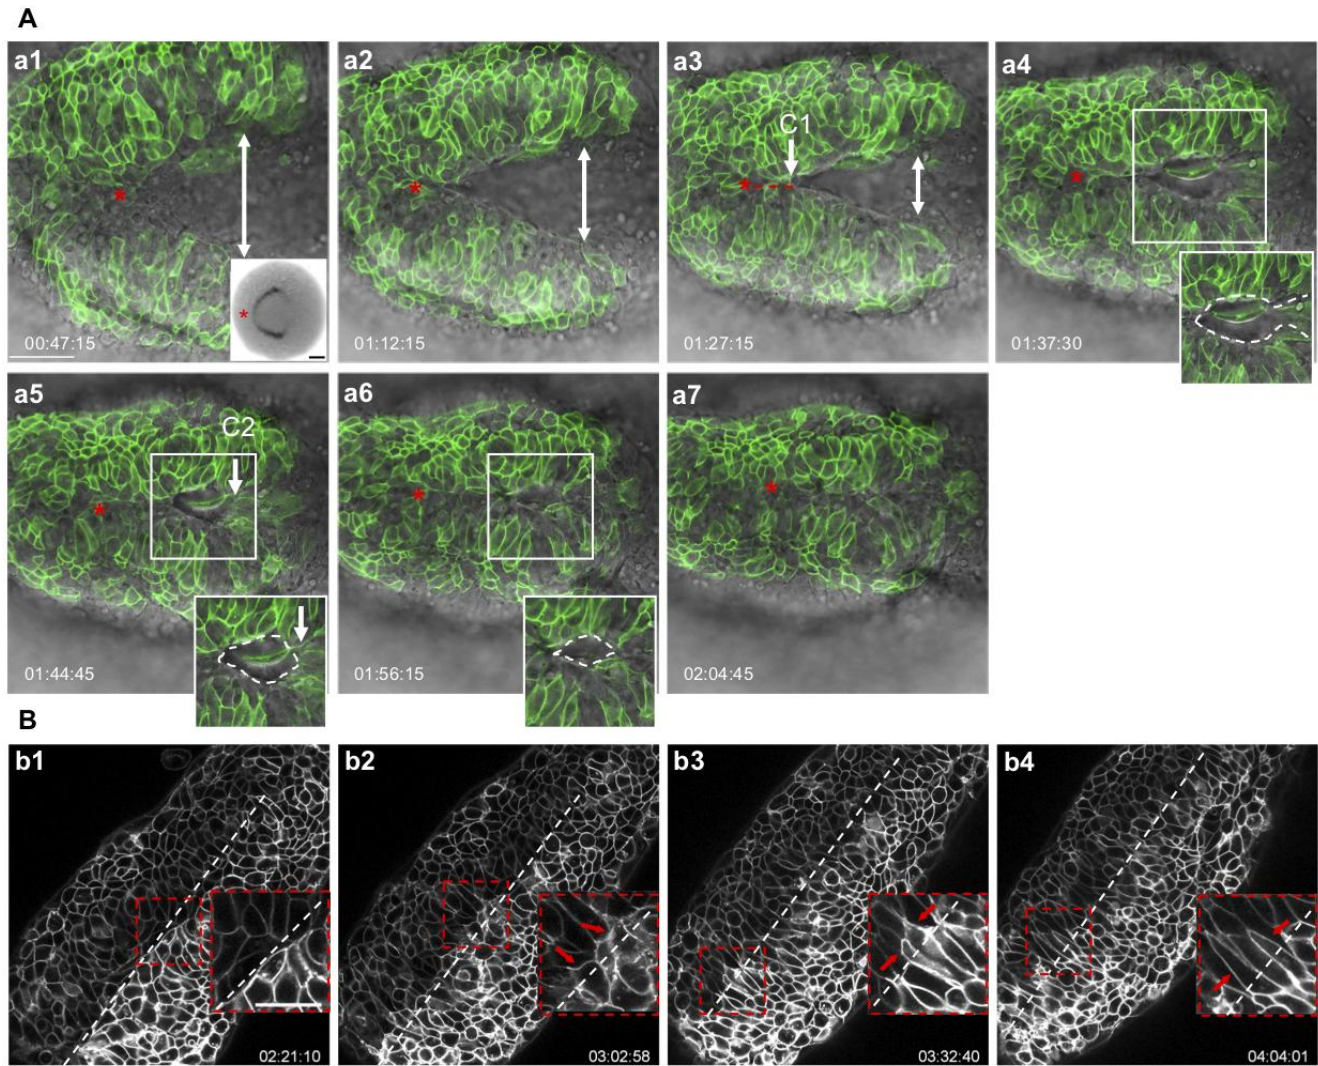

894  
895  
896  
897  
898  
899  
900  
901  
902  
903  
904  
905  
906  
907  
908  
909  
910  
911  
912

**Figure 8. Dynamics of neural fold fusion.** (A, a1-a7) Time lapse movie frames of an embryo expressing mosaic GFP, imaged from a dorsal view, showing the initiation of neural tube closure. Images are overlays of the green and brightfield channels. Inset in a1 shows a dorsal view of an *emx3*-labeled embryo. Insets in a4-a6 outline the eye-shaped opening that forms between closure sites one (CP1) and two (CP2) (B) Grey-scale time-lapse movie frames of an mGFP-labeled embryo imaged from a dorsal view, revealing the final stages of neural fold fusion. Insets in the lower right corner of panels b1-b4 are higher magnification views of boxed areas. Abbreviations: C1, C2: closure sites one and two. Annotations: red asterisk: apex of the neural fold arc; red dotted line: synchronous and posteriorly-directed neural fold fusion anterior to closure point one; white double arrows: distance between the neural folds; white dotted oval: eye shaped opening, the corners of which are defined by closure points one and two; white dotted line: embryonic midline; red arrows: filopodia extending across the midline; time-elapse is shown at the bottom of each panel. Scale bars: 50  $\mu$ m in a1, 100  $\mu$ m in a1 inset, and 25  $\mu$ m in b1.

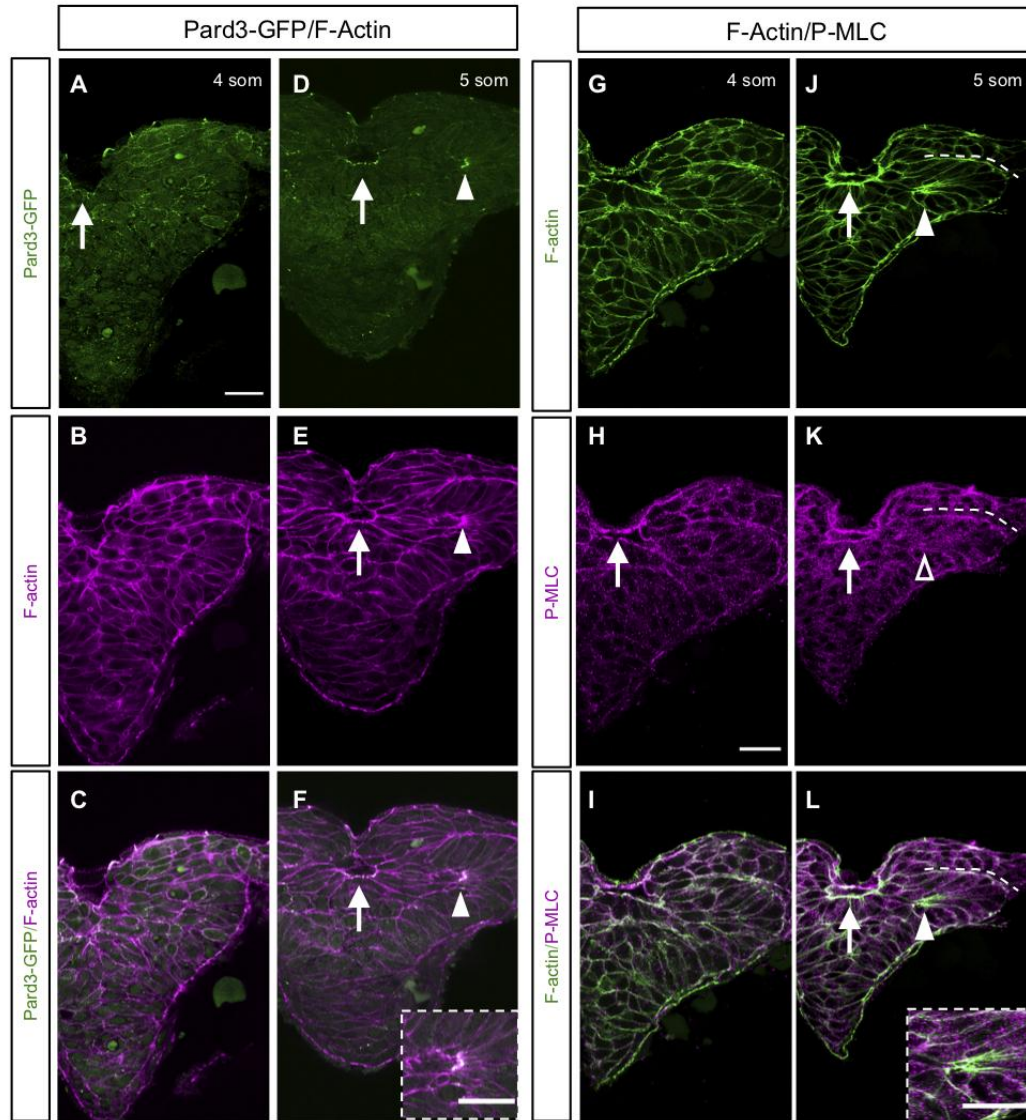

913  
914  
915  
916  
917  
918  
919  
920  
921  
922  
923  
924  
925  
926  
927  
928  
929  
930

**Figure 9. Molecular characterization of the MHP.** (A-L). Transverse sections through the ANP at the 4 (A-C, G-I) and 5 (D-F, J-L) som stages. (A-F) Embryos double-labeled with Pard3-GFP (green) and phalloidin (F-actin, red) (G-L) Embryos double-labeled with anti-P-MLC (red) and phalloidin (F-actin, green). (C, F, I, L) Magenta and green channel overlay. Insets in F and L show higher magnification images of the DLHP. Annotations: arrow = MHP; arrowhead = DLHP; dotted line (in J-L) = interface between the NE and NNE layers of the neural folds. Scale bars 25  $\mu$ m.



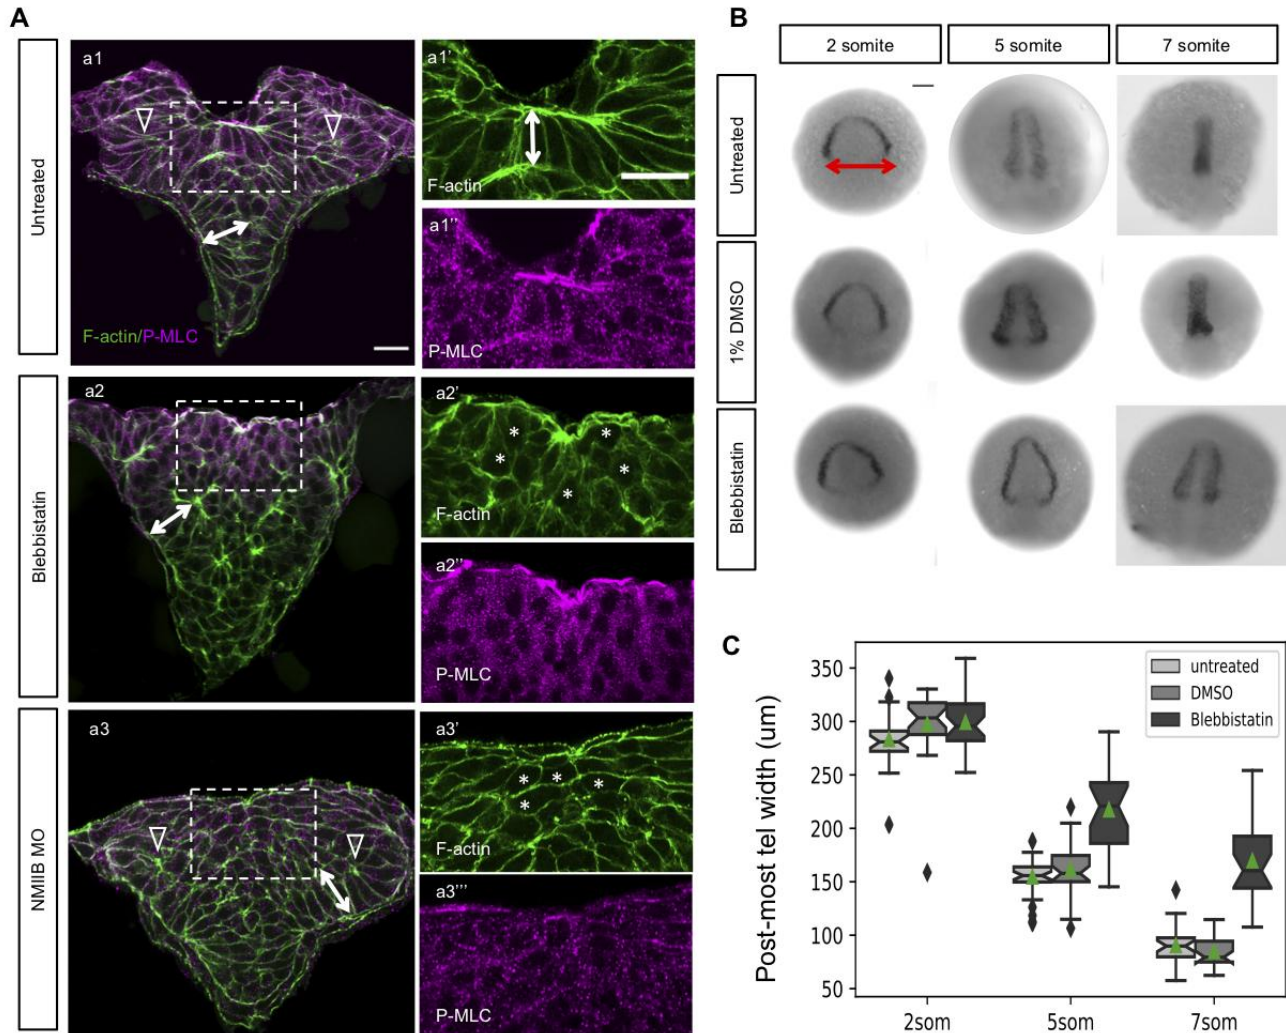

931  
932  
933  
934  
935  
936  
937  
938  
939  
940  
941  
942  
943  
944  
945  
946  
947  
948  
949  
950

**Figure 10. Role of non-muscle myosin II in apical constriction and neural fold convergence. (A).**

Transverse sections through the ANP of 5 somite control, untreated (a1-a1''), blebbistatin-treated (a2-a2'') and *NMIIB* MO-injected (a3, a3', a3''). Embryos were double-labeled with phalloidin (F-actin, green) (A-F) and anti-P-MLC (red). (B) Dorsal views of 2, 5 and 7 somite embryos untreated (top panels), DMSO-treated (middle row) and blebbistatin-treated (bottom row) labeled via *in situ* hybridization using an *emx3* riboprobe. (C) Boxplots showing distribution of posterior-most telencephalon widths (double red arrow in B) according to treatment group. Line in the middle of each boxplot is the median, notches around the median are 95% confidence intervals. Green triangles show the means. At least two independent experimental trials were performed for each developmental stage and treatment group. 2 som: Untreated: n=26, mean=283.224 ± 5.18; DMSO-treated: n= 26, mean=297.727 ± 6.41; blebbistatin-treated: n = 34, mean=299.412 ± 4.40. 5 som: Untreated: n=33, mean=154.688 ± 3.174; DMSO: n=30, mean=161.747 ± 4.73; blebbistatin-treated: n=23, mean=217.472 ± 8.43. Two-sided Mann Whitney U test: 5 som untreated vs DMSO: P=0.332; 5 som untreated vs blebbistatin-treated: P=1.30e<sup>-7</sup>; 5 som DMSO-treated vs blebbistatin-treated: P = 3.50e<sup>-6</sup>. 7 som: untreated: n=28, mean=90.444 ± 3.31; DMSO-treated: n=27, mean 84.855 ± 2.88; blebbistatin-treated: n=24, mean= 169.779 ± 7.52. Two-sided Mann Whitney U test: 7 som untreated vs DMSO: P=.170; 7 som untreated vs blebbistatin-treated: P=2.06e<sup>-9</sup>; 7 som DMSO-treated vs blebbistatin-treated: P = 1.46e<sup>-9</sup>. Annotations: double white arrows = cell length in deep layer; open arrowhead = DLHP; asterisks = rounded neuroectodermal cells; red double arrow = posterior-most telencephalon width. (a1'-a3'') Higher magnifications of boxed in areas in a1-a3. Scale bars: 25 µm in a1; 25 µm in a1' and 100 µm in B.

951 **SUPPLEMENTARY FIGURE LEGENDS**

952 **Supplemental Figure 1. 3-Dimensional rotation revealing organization of neural fold**  
953 **cells in a 5 som embryo.** Transverse section, at the level of the forebrain of a 5 somite  
954 embryo mosaically-expressing mGFP.

955  
956 **Supplemental Figure 2. 3-Dimensional rotation revealing organization of neural fold**  
957 **cells in a 7 som embryo.** Transverse section, at the level of the forebrain of a 7 somite  
958 embryo mosaically-expressing mGFP.

959  
960 **Supplemental Figure 3. MHP cells undergo oscillatory constriction with decreasing**  
961 **amplitude.** Time lapse imaging of embryo ubiquitously expressing mGFP. Clusters of medial  
962 (MHP) constrict apically in an oscillatory manner, in contrast to their lateral neighbors that do  
963 not. Annotations: cyan dots = MHP cells; yellow asterisks = MHP-adjacent cells that do not  
964 undergo apical constriction, yellow dashed line: midline, red asterisks = EVL cells.

965  
966 **Supplemental Figure 4. Neural tube closure is initiated at two closure points in the**  
967 **forebrain.** Time lapse imaging of embryo mosaically-expressing mGFP. The Green and  
968 brightfield channels are overlaid to reveal the shape of the neural folds and neural groove.  
969 Annotations: red asterisk: apex of the arch shaped neural folds; white dotted line: contour of  
970 the eye-shaped opening whose corners are defined by closure points 1 and 2, double headed  
971 arrow: width of the neural plate, which decreases over time, white arrows: closure points 1  
972 and 2, respectively.

973  
974 **Supplemental Figure 5. Neural fold cells extend filopodial protrusions across the**  
975 **midline.** Time lapse imaging of embryo ubiquitously expressing mGFP. Cells (cyan and  
976 magenta) originating from contralateral sides of the ANP extend medially-oriented filopodia  
977 and transiently interdigitate across the midline (yellow dashed line).

978  
979  
980
